# Supplementary material for: Tumor Cell–Derived MMP3 Orchestrates Rac1b and Tissue Alterations That Promote Pancreatic Adenocarcinoma
Source: Oxford University Press journal article supplement (doi:10.1158/1541-7786.mcr-13-0557-t), 2014-05-21
Supplement: 15417786mcr130557t-sup-tab6.xlsx [file 15417786mcr130557t-sup-tab6.xlsx]

## Sheet: Genes coregulated between Panc2
Biosets vs Genes record downloaded from NextBio(2013/05/29 12:47:21)
Bioset 1: Panc+MMP3 nextbio (Study: Panc+MMP3)
Bioset 2: Pancreatic cancer cell lines - metastatic AsPC-1 _vs_ primary BxPC-3 (Study: Gene expression pancreatic cancer cell lines: primary vs metastatic)
Bioset 3: Pancreatic cancer cell lines from same patient - oncolytic adenovirus insensitive _vs_ sensitive (Study: Pancreatic cancer cell lines PaTu8988s and PaTu8988t and susceptibility to oncolytic adenovirus)
https://mayo.nextbio.com/c/search/adv.nb?ids=708323,249280,182701
Gene	EntrezGene ID	Gene Description	Specificity	Overall Gene score	Score Bioset 1	p-value Bioset 1	activity type Bioset 1	activity value Bioset 1	Score Bioset 2	p-value Bioset 2	activity type Bioset 2	activity value Bioset 2	Score Bioset 3	p-value Bioset 3	activity type Bioset 3	activity value Bioset 3
TUBA1A	7846	tubulin, alpha 1a	3 out of 3	258.991	94.3931	0.007	fold change	-1.53369	68.4332	0.0012	fold change	13.4	96.1649	8.2e-05	fold change	-41.2
TGFB2	7042	transforming growth factor, beta 2	3 out of 3	244.69	99.8363	0.0296	fold change	-4.37276	57.3796	0.001	fold change	-7.86	87.4738	4.1e-05	fold change	-15.1
CD24	100133941	CD24 molecule	3 out of 3	239.556	98.5552	0.0281	fold change	-1.99695	98.7928	1.4e-07	fold change	-355	42.2083	0.001	fold change	2.92
FN1	2335	fibronectin 1	3 out of 3	239.137	99.9181	0.0044	fold change	-5.23366	59.2038	0.0066	fold change	-8.61	80.0154	0.0002	fold change	-9.61
ABCG1	9619	ATP-binding cassette, sub-family G (WHITE), member 1	3 out of 3	236.965	97.6944	0.0346	fold change	1.72157	86.4289	0.0018	fold change	43.8	52.8413	0.0026	fold change	3.79
CHST11	50515	carbohydrate (chondroitin 4) sulfotransferase 11	3 out of 3	236.963	93.9602	0.0234	fold change	1.51971	80.6452	0.0027	fold change	27.4	62.3574	0.0005	fold change	-5.03
ZNF114	163071	zinc finger protein 114	3 out of 3	223.633	95.6425	0.0121	fold change	-1.57722	39.636	0.0048	fold change	-4.04	88.3548	2.9e-05	fold change	-15.8
COL7A1	1294	collagen, type VII, alpha 1	3 out of 3	221.108	96.695	0.007	fold change	1.65066	74.3075	0.0006	fold change	-18	50.1057	0.0181	fold change	-3.54
SLC4A7	9497	solute carrier family 4, sodium bicarbonate cotransporter, member 7	3 out of 3	203.827	92.8954	0.0321	fold change	-1.48337	53.7658	0.001	fold change	-6.66	57.1664	0.0404	fold change	-4.26
EDN1	1906	endothelin 1	3 out of 3	203.574	96.091	0.0049	fold change	1.61084	63.6489	0.0061	fold change	10.6	43.8339	0.0133	fold change	3.04
PEG10	23089	paternally expressed 10	3 out of 3	196.521	90.1031	0.032	fold change	-1.41657	59.896	0.0064	fold change	-8.8	46.5216	0.0004	fold change	3.27
PRR5L	79899	proline rich 5 like	3 out of 3	191.769	97.3843	0.0111	fold change	-1.70622	35.3804	0.0018	fold change	3.53	59.0047	0.0004	fold change	4.5
JAG1	182	jagged 1	3 out of 3	190.478	94.4662	0.0481	fold change	1.53553	23.2881	0.0083	fold change	-2.42	72.7241	0.0008	fold change	7.26
TFPI	7035	tissue factor pathway inhibitor (lipoprotein-associated coagulation inhibitor)	3 out of 3	188.526	99.112	0.0096	fold change	-2.39633	33.9254	0.0038	fold change	3.38	55.489	0.0146	fold change	-4.07
FUT8	2530	fucosyltransferase 8 (alpha (1,6) fucosyltransferase)	3 out of 3	175.219	98.2415	0.0216	fold change	-1.79459	41.9203	0.0037	fold change	-4.39	35.0577	0.0003	fold change	-2.49
KLF12	11278	Kruppel-like factor 12	3 out of 3	172.883	90.3685	0.0417	fold change	-1.42144	67.605	0.0032	fold change	-12.9	14.9098	0.0269	fold change	1.52
SGK1	6446	serum/glucocorticoid regulated kinase 1	3 out of 3	168.674	92.6149	0.0259	fold change	-1.47574	30.7052	0.0078	fold change	-3.07	45.3544	0.0083	fold change	-3.17
OVOL2	58495	ovo-like 2 (Drosophila)	3 out of 3	167.804	95.5676	0.0274	fold change	-1.57355	23.2881	0.0044	fold change	-2.42	48.9481	1.8e-05	fold change	3.46
DKK1	22943	dickkopf 1 homolog (Xenopus laevis)	3 out of 3	164.048	99.3522	0.0008	fold change	-2.72	28.4918	0.0147	fold change	2.84	36.2038	0.018	fold change	2.56
IL27RA	9466	interleukin 27 receptor, alpha	3 out of 3	161.856	96.1649	0.0334	fold change	1.61285	12.8493	0.0002	fold change	1.62	52.8413	0.0038	fold change	-3.79
DUSP4	1846	dual specificity phosphatase 4	3 out of 3	156.842	96.6184	0.0347	fold change	1.64517	13.0957	0.0157	fold change	1.64	47.128	0.0119	fold change	-3.31
CCDC69	26112	coiled-coil domain containing 69	3 out of 3	156.231	98.3187	0.0283	fold change	1.85446	27.6086	0.0288	fold change	-2.77	30.3039	0.002	fold change	-2.22
NAP1L1	4673	nucleosome assembly protein 1-like 1	3 out of 3	152.791	92.4061	0.0326	fold change	-1.4735	13.491	0.0231	fold change	1.67	46.8942	0.0176	fold change	-3.3
DST	667	dystonin	3 out of 3	151.811	90.6355	0.031	fold change	-1.42616	32.0002	0.0007	fold change	3.19	11.9709	0.0324	fold change	-1.36
TPK1	27010	thiamin pyrophosphokinase 1	3 out of 3	150.582	91.9912	0.0257	fold change	1.4643	36.0129	0.0036	fold change	3.6	22.578	0.0198	fold change	1.87
SLC30A1	7779	solute carrier family 30 (zinc transporter), member 1	3 out of 3	149.324	98.6349	0.0386	fold change	2.08159	18.1211	0.0033	fold change	2.02	32.5682	0.0331	fold change	2.34
PELI1	57162	pellino E3 ubiquitin protein ligase 1	3 out of 3	146.794	97.7727	0.0493	fold change	-1.75116	18.7171	0.0005	fold change	2.07	30.3039	0.0089	fold change	2.22
BST1	683	bone marrow stromal cell antigen 1	3 out of 3	145.966	90.2348	0.0488	fold change	-1.42037	30.6211	0.0008	fold change	3.06	25.1101	0.0025	fold change	-1.98
NRP1	8829	neuropilin 1	3 out of 3	145.553	97.3066	0.0242	fold change	1.70493	20.094	0.0484	fold change	2.18	28.1524	0.0052	fold change	-2.13
NFKB2	4791	nuclear factor of kappa light polypeptide gene enhancer in B-cells 2 (p49/p100)	3 out of 3	145.04	93.8879	0.0335	fold change	1.51729	14.1756	0.0211	fold change	1.72	36.9771	0.0105	fold change	-2.6
TOR1AIP1	26092	torsin A interacting protein 1	3 out of 3	143.961	92.0607	0.044	fold change	-1.46499	14.3009	0.0055	fold change	1.73	37.5991	0.0089	fold change	-2.63
TMEM132A	54972	transmembrane protein 132A	3 out of 3	143.466	94.9758	0.04	fold change	1.54205	17.747	0.0248	fold change	-1.99	30.7437	0.0022	fold change	-2.24
NFKBIZ	64332	nuclear factor of kappa light polypeptide gene enhancer in B-cells inhibitor, zeta	3 out of 3	143.067	95.2708	0.0039	fold change	1.5476	30.1183	0.0105	fold change	-3	17.6781	0.0366	fold change	-1.65
TRIQK	286144	triple QxxK/R motif containing	3 out of 3	142.602	93.6032	0.0309	fold change	-1.50272	24.1576	0.0007	fold change	2.48	24.8411	0.014	fold change	1.97
APOL6	80830	apolipoprotein L, 6	3 out of 3	140.87	97.0007	0.0325	fold change	1.66825	18.5785	0.0098	fold change	-2.06	25.291	0.0166	fold change	-1.99
PDE7A	5150	phosphodiesterase 7A	3 out of 3	140.409	95.1239	0.008	fold change	-1.54635	25.0386	0.0013	fold change	-2.55	20.2463	0.0452	fold change	1.77
PGRMC2	10424	progesterone receptor membrane component 2	3 out of 3	138.745	92.6853	0.0203	fold change	-1.47738	11.9175	0.0277	fold change	-1.55	34.1423	0.0012	fold change	-2.43
TRIO	7204	trio Rho guanine nucleotide exchange factor	3 out of 3	137.955	90.3016	0.0022	fold change	-1.42078	12.3138	0.0175	fold change	-1.58	35.3399	3.1e-05	fold change	-2.51
DUSP1	1843	dual specificity phosphatase 1	3 out of 3	137.188	98.4775	0.0401	fold change	-1.94789	17.482	0.045	fold change	1.97	21.2288	0.0071	fold change	-1.81
PFKFB2	5208	6-phosphofructo-2-kinase/fructose-2,6-biphosphatase 2	3 out of 3	137.118	91.5801	0.0481	fold change	-1.45812	12.97	0.0046	fold change	1.63	32.5682	0.0201	fold change	2.34
DNAH5	1767	dynein, axonemal, heavy chain 5	3 out of 3	136.91	92.9662	0.0401	fold change	-1.4875	33.2734	0.0462	fold change	-3.32	10.6708	0.0161	fold change	-1.27
ZNF124	7678	zinc finger protein 124	3 out of 3	136.39	90.501	0.0424	fold change	-1.42458	32.1341	0.0005	fold change	-3.2	13.7552	0.0238	fold change	1.46
SNX16	64089	sorting nexin 16	3 out of 3	135.937	90.8364	0.0487	fold change	-1.43657	11.1187	0.0287	fold change	-1.49	33.9819	0.0082	fold change	-2.42
ERBB2IP	55914	erbb2 interacting protein	3 out of 3	129.754	97.0761	0.0397	fold change	-1.6725	15.7222	0.0036	fold change	1.84	16.9562	0.0149	fold change	-1.62
RANBP9	10048	RAN binding protein 9	3 out of 3	125.93	93.7453	0.0252	fold change	-1.50823	9.17568	0.0427	fold change	-1.33	23.009	0.0259	fold change	-1.89
MOCOS	55034	molybdenum cofactor sulfurase	3 out of 3	119.96	93.8174	0.0141	fold change	1.51728	12.97	0.0018	fold change	-1.63	13.1729	0.0454	fold change	1.43
IKBKE	9641	inhibitor of kappa light polypeptide gene enhancer in B-cells, kinase epsilon	3 out of 3	119.013	94.5376	0.0233	fold change	1.53698	11.6664	0.0195	fold change	1.53	12.8091	0.008	fold change	-1.41
VPS53	55275	vacuolar protein sorting 53 homolog (S. cerevisiae)	3 out of 3	117.841	94.8299	0.0063	fold change	1.54078	10.3789	0.0195	fold change	1.43	12.6327	0.0026	fold change	-1.4
TBL1XR1	79718	transducin (beta)-like 1 X-linked receptor 1	3 out of 3	117.202	90.7013	0.036	fold change	-1.42785	10.3789	0.0233	fold change	-1.43	16.1222	0.0036	fold change	1.58
ATP6V1A	523	ATPase, H+ transporting, lysosomal 70kDa, V1 subunit A	3 out of 3	116.843	96.8467	0.0062	fold change	-1.66503	10.0038	0.0062	fold change	-1.4	9.99245	0.0332	fold change	1.21
GDF11	10220	growth differentiation factor 11	3 out of 3	114.566	94.611	0.0471	fold change	-1.53781	9.51667	0.0452	fold change	1.36	10.4379	0.0237	fold change	-1.25
CDH17	1015	cadherin 17, LI cadherin (liver-intestine)	2 out of 3	198.145					99.3522	1.4e-05	fold change	492	98.7928	2.3e-06	fold change	87.6
CALD1	800	caldesmon 1	2 out of 3	198.065					99.1926	6.6e-06	fold change	-432	98.8728	0.0007	fold change	-94.8
MAL2	114569	mal, T-cell differentiation protein 2 (gene/pseudogene)	2 out of 3	197.917					98.2415	1.3e-05	fold change	-271	99.6751	6.1e-05	fold change	208.2
LYZ	4069	lysozyme	2 out of 3	197.21					97.6162	1.1e-05	fold change	218.6	99.5937	8.3e-08	fold change	196.8
RNF128	79589	ring finger protein 128, E3 ubiquitin protein ligase	2 out of 3	195.208					96.0154	8.1e-05	fold change	158.9	99.1926	4.6e-06	fold change	126.9
TSPAN8	7103	tetraspanin 8	2 out of 3	194.894					94.9758	0.002	fold change	116.3	99.9181	0.0004	fold change	391.6
TOX3	27324	TOX high mobility group box family member 3	2 out of 3	194.853					96.8467	4.2e-07	fold change	177	98.0065	6.1e-06	fold change	61.8
LGALS4	3960	lectin, galactoside-binding, soluble, 4	2 out of 3	194.269					94.7562	9.1e-05	fold change	115.1	99.5124	0.0003	fold change	155.7
VIM	7431	vimentin	2 out of 3	193.145					94.9037	0.0143	fold change	115.7	98.2415	9.9e-05	fold change	-65.2
TMEM30B	161291	transmembrane protein 30B	2 out of 3	192.635					96.091	0.0022	fold change	-163	96.5437	0.0008	fold change	43.7
GALNT3	2591	UDP-N-acetyl-alpha-D-galactosamine:polypeptide N-acetylgalactosaminyltransferase 3 (GalNAc-T3)	2 out of 3	192.574					94.1761	1.8e-06	fold change	-104	98.3981	0.0003	fold change	70.7
213880_at	NA		2 out of 3	191.983					94.8299	0.0024	fold change	115.4	97.1534	1.2e-05	fold change	48.6
TMEM176B	28959	transmembrane protein 176B	2 out of 3	191.302					92.8247	8e-05	fold change	94.4	98.4775	0.0013	fold change	70.9
CLRN3	119467	clarin 3	2 out of 3	187.708					93.5314	0.0001	fold change	98.6	94.1761	0.0001	fold change	32
DSE	29940	dermatan sulfate epimerase	2 out of 3	186.088					91.0382	3.8e-06	fold change	-73	95.0498	0.0013	fold change	-35.2
ZEB1	6935	zinc finger E-box binding homeobox 1	2 out of 3	184.767					89.6427	0.0018	fold change	59.9	95.1239	2.9e-06	fold change	-35.3
NPNT	255743	nephronectin	2 out of 3	184.408					87.1019	0.0104	fold change	45.9	97.3066	7.8e-05	fold change	52.1
ANXA10	11199	annexin A10	2 out of 3	184.354					88.0375	0.0104	fold change	-50.1	96.3168	2.1e-05	fold change	42.3
LY75	4065	lymphocyte antigen 75	2 out of 3	183.734					95.1239	6.9e-05	fold change	-118	88.6101	0.0023	fold change	16.1
COL12A1	1303	collagen, type XII, alpha 1	2 out of 3	183.098					97.1534	0.0002	fold change	-198	85.9446	0.0007	fold change	-13.7
MMP7	4316	matrix metallopeptidase 7 (matrilysin, uterine)	2 out of 3	182.23					87.4738	4.5e-07	fold change	46.5	94.7562	0.0007	fold change	34.3
ANTXR1	84168	anthrax toxin receptor 1	2 out of 3	181.47					90.7688	1.1e-06	fold change	-69.2	90.7013	0.0001	fold change	-20.2
ESRP1	54845	epithelial splicing regulatory protein 1	2 out of 3	180.473					82.1544	0.0084	fold change	-30.3	98.3187	0.0004	fold change	67.3
SLC6A20	54716	solute carrier family 6 (proline IMINO transporter), member 20	2 out of 3	180.296					89.1234	1.9e-05	fold change	55.4	91.1727	0.0001	fold change	21
ANXA8L2	244	annexin A8-like 2	2 out of 3	179.755					94.4662	1.8e-05	fold change	-109	85.2893	0.0016	fold change	-13
DDC	1644	dopa decarboxylase (aromatic L-amino acid decarboxylase)	2 out of 3	179.69					90.501	6.7e-06	fold change	67.8	89.1886	7.9e-06	fold change	17.5
FAM126A	84668	family with sequence similarity 126, member A	2 out of 3	179.345					85.8856	0.0011	fold change	-41.2	93.4597	7.3e-05	fold change	-28.2
SLC16A4	9122	solute carrier family 16, member 4 (monocarboxylic acid transporter 5)	2 out of 3	178.689					93.4597	0.0013	fold change	98.4	85.2297	5.2e-05	fold change	12.9
MPZL2	10205	myelin protein zero-like 2	2 out of 3	178.397					86.6116	2.6e-06	fold change	-44.4	91.7852	1.2e-05	fold change	22.6
GCNT3	9245	glucosaminyl (N-acetyl) transferase 3, mucin type	2 out of 3	178.385					89.7747	0.0003	fold change	60.9	88.6101	0.0035	fold change	16.1
FRMD6	122786	FERM domain containing 6	2 out of 3	178.146					87.0413	0.0058	fold change	-45.2	91.1046	0.0005	fold change	-20.9
AKR1B10	57016	aldo-keto reductase family 1, member B10 (aldose reductase)	2 out of 3	176.943					77.5904	0.01	fold change	-21.9	99.3522	7.6e-05	fold change	138.2
VIL1	7429	villin 1	2 out of 3	176.665					89.2522	6.2e-06	fold change	56.3	87.4126	0.0043	fold change	15
TM4SF4	7104	transmembrane 4 L six family member 4	2 out of 3	176.542					95.7909	3.6e-05	fold change	153.5	80.7507	7.5e-06	fold change	9.83
FXYD3	5349	FXYD domain containing ion transport regulator 3	2 out of 3	176.337					80.1719	0.0134	fold change	-26.3	96.1649	4.8e-05	fold change	41.2
RAB25	57111	RAB25, member RAS oncogene family	2 out of 3	175.844					80.2761	3.8e-07	fold change	-26.5	95.5676	3.6e-06	fold change	38.6
TMEM45B	120224	transmembrane protein 45B	2 out of 3	175.48					81.2308	0.0012	fold change	28.9	94.2489	3.3e-07	fold change	32.5
TMC5	79838	transmembrane channel-like 5	2 out of 3	174.823					89.0583	8.2e-05	fold change	55.2	85.7648	0.0004	fold change	13.4
DPP4	1803	dipeptidyl-peptidase 4	2 out of 3	174.228					97.0761	2.4e-06	fold change	191.2	77.1522	3.1e-05	fold change	8.37
LGALS2	3957	lectin, galactoside-binding, soluble, 2	2 out of 3	173.787					94.3931	0.0019	fold change	107.9	79.3941	0.0005	fold change	9.4
PTX3	5806	pentraxin 3, long	2 out of 3	172.48					74.397	0.0012	fold change	-18.1	98.0834	0.0002	fold change	-63.5
LPCAT2	54947	lysophosphatidylcholine acyltransferase 2	2 out of 3	172.266					92.4061	2.9e-05	fold change	-90.2	79.8594	2.7e-05	fold change	-9.57
TMPRSS4	56649	transmembrane protease, serine 4	2 out of 3	170.521					85.349	0.0016	fold change	-40.2	85.1716	0.0002	fold change	12.8
SDR16C5	195814	short chain dehydrogenase/reductase family 16C, member 5	2 out of 3	170.388					81.0701	0.0025	fold change	-28.4	89.3176	0.0003	fold change	17.6
KCTD12	115207	potassium channel tetramerisation domain containing 12	2 out of 3	170.037					96.9236	0.0001	fold change	-180	73.1133	0.0059	fold change	-7.39
IL1A	3552	interleukin 1, alpha	2 out of 3	169.267					74.217	0.0005	fold change	-17.9	95.0498	9.1e-05	fold change	-35.2
PLA2G4A	5321	phospholipase A2, group IVA (cytosolic, calcium-dependent)	2 out of 3	168.965					96.2408	2e-06	fold change	-167	72.7241	0.0001	fold change	-7.26
HSD17B2	3294	hydroxysteroid (17-beta) dehydrogenase 2	2 out of 3	168.654					72.6385	0.0017	fold change	16.6	96.0154	2.2e-05	fold change	40.9
FRMD5	84978	FERM domain containing 5	2 out of 3	168.547	98.8728	0.029	fold change	-2.14149	69.6738	3.7e-06	fold change	-14.5
ANXA13	312	annexin A13	2 out of 3	168.514					88.2909	0.0033	fold change	51.1	80.2233	0.0017	fold change	9.66
AIM1	202	absent in melanoma 1	2 out of 3	167.825					79.3437	0.002	fold change	-24.2	88.4815	0.0001	fold change	16
1566764_at	NA		2 out of 3	167.764					75.0785	2.8e-05	fold change	-18.9	92.6853	1.4e-05	fold change	25.9
RIMS2	9699	regulating synaptic membrane exocytosis 2	2 out of 3	167.695	92.7541	0.0344	fold change	-1.47762					74.9412	0.0018	fold change	-7.79
SLC27A2	11001	solute carrier family 27 (fatty acid transporter), member 2	2 out of 3	167.329					75.6796	0.0001	fold change	-19.4	91.6489	0.0001	fold change	21.8
LRRN1	57633	leucine rich repeat neuronal 1	2 out of 3	167.217					80.9101	0.0006	fold change	-28	86.3066	4.7e-05	fold change	-14
QPCT	25797	glutaminyl-peptide cyclotransferase	2 out of 3	166.558	93.5314	0.0206	fold change	1.50267					73.0268	0.0007	fold change	7.38
TMEM45A	55076	transmembrane protein 45A	2 out of 3	166.023					96.4674	5.3e-07	fold change	-169	69.5555	0.0041	fold change	-6.43
WDR72	256764	WD repeat domain 72	2 out of 3	165.767					98.7147	1.7e-07	fold change	-338	67.052	0.0028	fold change	-5.85
LPIN1	23175	lipin 1	2 out of 3	165.589	98.7928	0.0471	fold change	-2.09359					66.7967	0.0004	fold change	-5.81
LXN	56925	latexin	2 out of 3	165.585					82.3737	3e-05	fold change	30.6	83.2113	0.0001	fold change	11.4
CALML4	91860	calmodulin-like 4	2 out of 3	165.534					75.0334	0.0021	fold change	18.8	90.501	0.0004	fold change	19.5
CEACAM5	1048	carcinoembryonic antigen-related cell adhesion molecule 5	2 out of 3	165.022					71.9155	0.0167	fold change	-16.1	93.1064	1e-05	fold change	27.6
PPP4R4	57718	protein phosphatase 4, regulatory subunit 4	2 out of 3	164.775					83.4362	3e-06	fold change	-33.4	81.3392	0.0058	fold change	-10.2
IRF6	3664	interferon regulatory factor 6	2 out of 3	164.574					83.6638	1.4e-05	fold change	-34.7	80.9101	0.0028	fold change	9.92
MUC13	56667	mucin 13, cell surface associated	2 out of 3	163.309					84.8767	0.0109	fold change	39.3	78.4326	3.1e-05	fold change	8.8
CNN3	1266	calponin 3, acidic	2 out of 3	162.931					91.3075	0.0089	fold change	-75.3	71.623	1.3e-06	fold change	-7
CYP3A5	1577	cytochrome P450, family 3, subfamily A, polypeptide 5	2 out of 3	162.466					68.4332	0.0004	fold change	13.4	94.0327	1.2e-05	fold change	29.6
SGPP2	130367	sphingosine-1-phosphate phosphatase 2	2 out of 3	161.661					68.1292	1.4e-05	fold change	13.2	93.5314	0.0011	fold change	28.3
AA576959	NA		2 out of 3	161.032					80.0154	0.0007	fold change	25.7	81.0163	3.3e-06	fold change	10
REG4	83998	regenerating islet-derived family, member 4	2 out of 3	161.014					61.1778	0.0439	fold change	9.31	99.8363	3.7e-06	fold change	323.9
AZGP1	563	alpha-2-glycoprotein 1, zinc-binding	2 out of 3	161.011					71.498	0.0008	fold change	15.7	89.5127	0.0023	fold change	17.7
CPE	1363	carboxypeptidase E	2 out of 3	160.629					82.5955	2.5e-07	fold change	-31.6	78.0336	0.0111	fold change	-8.63
SOX7	83595	SRY (sex determining region Y)-box 7	2 out of 3	160.455					68.7389	0.0027	fold change	-13.7	91.7162	2.9e-05	fold change	-22.5
S100A4	6275	S100 calcium binding protein A4	2 out of 3	160.105					72.9405	0.0008	fold change	16.8	87.1642	1.7e-05	fold change	14.9
TRNP1	388610	TMF1-regulated nuclear protein 1	2 out of 3	159.456					78.3318	3.2e-05	fold change	23	81.1241	0.013	fold change	10.1
ANK3	288	ankyrin 3, node of Ranvier (ankyrin G)	2 out of 3	159.406					64.7216	0.0128	fold change	-11.2	94.6844	8.6e-06	fold change	33.9
FGF2	2247	fibroblast growth factor 2 (basic)	2 out of 3	158.229					78.8855	0.0015	fold change	23.7	79.3437	0.0094	fold change	-9.36
RARRES1	5918	retinoic acid receptor responder (tazarotene induced) 1	2 out of 3	157.984					94.1035	0.0026	fold change	102.9	63.8806	0.0004	fold change	5.25
ALOX5	240	arachidonate 5-lipoxygenase	2 out of 3	157.717					59.8673	0.0034	fold change	8.79	97.8493	0.0003	fold change	59.2
TMEM176A	55365	transmembrane protein 176A	2 out of 3	157.67					78.6324	0.0018	fold change	23.4	79.0376	0.0002	fold change	9.16
CD109	135228	CD109 molecule	2 out of 3	156.578					79.8594	0.0053	fold change	-25.4	76.7189	0.0003	fold change	-8.28
GDA	9615	guanine deaminase	2 out of 3	156.308					69.635	0.0008	fold change	14.4	86.6731	0.0012	fold change	14.5
LHFP	10186	lipoma HMGIC fusion partner	2 out of 3	156.147					73.551	0.0086	fold change	-17.3	82.5955	0.002	fold change	-11
PPP1R1B	84152	protein phosphatase 1, regulatory (inhibitor) subunit 1B	2 out of 3	155.454					64.4837	2.9e-05	fold change	11.1	90.9703	0.0007	fold change	20.7
HOXA13	3209	homeobox A13	2 out of 3	155.363					67.198	0.0017	fold change	12.6	88.1648	3e-05	fold change	15.7
IFI27	3429	interferon, alpha-inducible protein 27	2 out of 3	154.979					62.6433	0.0115	fold change	-10.1	92.3361	8.4e-06	fold change	24.3
MUC4	4585	mucin 4, cell surface associated	2 out of 3	154.884					89.5784	0.0003	fold change	-59	65.3057	0.0015	fold change	5.52
PKDCC	91461	protein kinase domain containing, cytoplasmic homolog (mouse)	2 out of 3	154.062					84.8191	0.0006	fold change	39.2	69.2425	0.0019	fold change	6.34
S100P	6286	S100 calcium binding protein P	2 out of 3	153.921					54.968	0.022	fold change	-6.97	98.9531	3.8e-05	fold change	114.3
PDGFC	56034	platelet derived growth factor C	2 out of 3	153.842					92.9662	0.0002	fold change	-96.5	60.8754	0.0005	fold change	-4.75
CLDN3	1365	claudin 3	2 out of 3	153.797					67.3083	0.0121	fold change	12.7	86.4887	5.7e-05	fold change	14.4
PTPRN2	5799	protein tyrosine phosphatase, receptor type, N polypeptide 2	2 out of 3	153.639					91.3759	5.4e-05	fold change	75.6	62.2626	0.008	fold change	4.99
NAV2	89797	neuron navigator 2	2 out of 3	152.742					67.8656	0.0187	fold change	-13.1	84.8767	3.5e-06	fold change	-12.5
SEL1L3	23231	sel-1 suppressor of lin-12-like 3 (C. elegans)	2 out of 3	152.439	98.0065	0.0162	fold change	1.7901					54.4324	0.001	fold change	3.97
RHOU	58480	ras homolog family member U	2 out of 3	152.153					88.93	5.2e-06	fold change	54.9	63.2231	0.0027	fold change	5.16
221760_at	NA		2 out of 3	152.034					76.8628	0.0054	fold change	21	75.171	0.0007	fold change	-7.82
AW779917	NA		2 out of 3	151.734					76.0075	0.0073	fold change	-19.9	75.7266	0.0068	fold change	-7.93
MPP7	143098	membrane protein, palmitoylated 7 (MAGUK p55 subfamily member 7)	2 out of 3	151.604					86.3677	0.0002	fold change	-43.3	65.2367	0.0001	fold change	5.5
ID2	3398	inhibitor of DNA binding 2, dominant negative helix-loop-helix protein	2 out of 3	151.312					53.6953	0.0014	fold change	6.65	97.6162	7e-05	fold change	55.9
N26620	NA		2 out of 3	151.278					76.2905	2.1e-05	fold change	-20.4	74.9873	0.0013	fold change	-7.8
GPA33	10223	glycoprotein A33 (transmembrane)	2 out of 3	151.113					87.6609	0.0082	fold change	47.1	63.4518	0.0005	fold change	5.19
GPR160	26996	G protein-coupled receptor 160	2 out of 3	150.876					62.9644	0.0009	fold change	10.2	87.9121	0.0006	fold change	15.4
LPAR1	1902	lysophosphatidic acid receptor 1	2 out of 3	150.837					86.4887	0.0034	fold change	-44.1	64.3484	0.0018	fold change	-5.35
PRRG4	79056	proline rich Gla (G-carboxyglutamic acid) 4 (transmembrane)	2 out of 3	150.58					84.995	1.9e-06	fold change	-39.5	65.585	0.0023	fold change	5.55
GATM	2628	glycine amidinotransferase (L-arginine:glycine amidinotransferase)	2 out of 3	149.392					91.5801	0.0001	fold change	-79.4	57.8115	0.0004	fold change	4.36
AF198444	NA		2 out of 3	149.114					58.2778	0.0037	fold change	-8.21	90.8364	0.0005	fold change	20.5
BF968097	NA		2 out of 3	149.079	98.9531	0.0456	fold change	-2.21042	50.1258	0.0002	fold change	-5.79
COBL	23242	cordon-bleu homolog (mouse)	2 out of 3	148.497					75.0334	5.4e-05	fold change	18.8	73.4635	2.3e-05	fold change	7.47
FERMT2	10979	fermitin family member 2	2 out of 3	148.481					90.0366	1.9e-06	fold change	-64.3	58.444	0.0007	fold change	-4.42
FSTL1	11167	follistatin-like 1	2 out of 3	148.467					64.1141	0.0007	fold change	-10.8	84.3526	0.0003	fold change	-12.3
BF674612	NA		2 out of 3	148.175	96.4674	0.0352	fold change	-1.62952					51.7074	0.0083	fold change	-3.68
GLUL	2752	glutamate-ammonia ligase	2 out of 3	148.049					99.7546	6.7e-07	fold change	-670	48.2942	0.0018	fold change	-3.41
NAV3	89795	neuron navigator 3	2 out of 3	147.673					84.6439	0.002	fold change	38.6	63.0287	0.0006	fold change	-5.12
ATP10D	57205	ATPase, class V, type 10D	2 out of 3	147.281					82.0439	0.0001	fold change	-30.2	65.2367	0.002	fold change	-5.5
FHL1	2273	four and a half LIM domains 1	2 out of 3	147.14					53.3225	0.0209	fold change	6.56	93.8174	0.0001	fold change	-28.7
PYGL	5836	phosphorylase, glycogen, liver	2 out of 3	146.753					75.5869	8.5e-05	fold change	-19.3	71.1663	0.0021	fold change	-6.83
CASP1	834	caspase 1, apoptosis-related cysteine peptidase	2 out of 3	146.659					91.7162	0.0009	fold change	-80.3	54.9432	0.0202	fold change	-4.01
TOX2	84969	TOX high mobility group box family member 2	2 out of 3	146.659					56.2246	0.0001	fold change	-7.46	90.4339	0.0027	fold change	-19.2
UTRN	7402	utrophin	2 out of 3	146.312					68.1292	0.0002	fold change	-13.2	78.1824	7.9e-06	fold change	-8.7
HKDC1	80201	hexokinase domain containing 1	2 out of 3	146.079					77.8368	0.0018	fold change	22.5	68.2426	0.0003	fold change	6.07
HNF4G	3174	hepatocyte nuclear factor 4, gamma	2 out of 3	145.966					59.78	7.3e-05	fold change	8.76	86.1861	0.004	fold change	13.9
KIAA1199	57214	KIAA1199	2 out of 3	145.347					59.4615	0.0036	fold change	-8.69	85.8856	4.9e-05	fold change	13.5
ZNF805	390980	zinc finger protein 805	2 out of 3	145.216	95.7158	0.0213	fold change	1.57922	49.5	4.6e-05	fold change	-5.68
LINC00483	55018	long intergenic non-protein coding RNA 483	2 out of 3	144.897					81.0163	0.0008	fold change	28.3	63.8806	9.8e-05	fold change	5.25
NEDD9	4739	neural precursor cell expressed, developmentally down-regulated 9	2 out of 3	144.59					97.4621	2.9e-07	fold change	-209	47.128	0.0003	fold change	3.31
IKBIP	121457	IKBKB interacting protein	2 out of 3	144.483					60.1308	0.0003	fold change	8.86	84.3526	0.0001	fold change	-12.3
TRIM22	10346	tripartite motif containing 22	2 out of 3	144.455					74.6224	0.0001	fold change	-18.5	69.8324	0.0017	fold change	-6.49
KLHL5	51088	kelch-like 5 (Drosophila)	2 out of 3	144.196					60.1308	0.0002	fold change	-8.86	84.0647	8.2e-06	fold change	-12
B3GALNT1	8706	beta-1,3-N-acetylgalactosaminyltransferase 1 (globoside blood group)	2 out of 3	144.194					84.8191	1.9e-07	fold change	-39.2	59.3754	0.0211	fold change	-4.56
FHOD3	80206	formin homology 2 domain containing 3	2 out of 3	143.732					66.8691	0.0001	fold change	-12.5	76.8628	7.9e-05	fold change	-8.31
ARID5B	84159	AT rich interactive domain 5B (MRF1-like)	2 out of 3	143.53					85.5271	0.0001	fold change	-40.8	58.0026	0.0006	fold change	4.38
PLS1	5357	plastin 1	2 out of 3	143.444					63.9468	6.4e-05	fold change	10.7	79.4976	7.5e-05	fold change	9.41
SLC39A8	64116	solute carrier family 39 (zinc transporter), member 8	2 out of 3	143.444					73.3321	0.0343	fold change	-17.2	70.1115	0.0102	fold change	-6.57
KLK6	5653	kallikrein-related peptidase 6	2 out of 3	143.321					50.9149	2.9e-05	fold change	6.03	92.4061	2.8e-05	fold change	24.4
TLR1	7096	toll-like receptor 1	2 out of 3	143.155	95.0498	0.0142	fold change	1.54297	48.1056	0.0279	fold change	5.45
C11orf93	120376	chromosome 11 open reading frame 93	2 out of 3	143.1					59.6637	0.0235	fold change	-8.72	83.4362	3.4e-05	fold change	11.5
TM4SF5	9032	transmembrane 4 L six family member 5	2 out of 3	142.788					63.6489	0.0075	fold change	10.6	79.139	0.0001	fold change	9.28
LAPTM5	7805	lysosomal protein transmembrane 5	2 out of 3	142.77					89.447	0.0002	fold change	-57.9	53.3225	0.0011	fold change	-3.83
PRSS3	5646	protease, serine, 3	2 out of 3	142.759					52.3906	0.0002	fold change	6.34	90.3685	0.0027	fold change	19.1
PLEK2	26499	pleckstrin 2	2 out of 3	142.734	91.3075	0.0053	fold change	1.45333					51.426	9.2e-05	fold change	3.66
FGFR3	2261	fibroblast growth factor receptor 3	2 out of 3	142.599					67.198	0.0009	fold change	-12.6	75.4011	0.0037	fold change	7.84
IGFBP4	3487	insulin-like growth factor binding protein 4	2 out of 3	142.417	99.0315	0.0191	fold change	2.23649					43.3851	0.0205	fold change	-3
LOC100505989	100505989	uncharacterized LOC100505989	2 out of 3	142.277					49.8013	0.0152	fold change	5.75	92.4761	7.6e-06	fold change	24.6
CDH3	1001	cadherin 3, type 1, P-cadherin (placental)	2 out of 3	142.219					63.4848	0.0002	fold change	-10.5	78.734	0.0005	fold change	8.98
POF1B	79983	premature ovarian failure, 1B	2 out of 3	142.217					53.4154	0.0019	fold change	6.57	88.8021	3.5e-05	fold change	16.4
LOC100505946	100505946	uncharacterized LOC100505946	2 out of 3	142.098					75.9129	9.6e-05	fold change	-19.6	66.1848	0.0003	fold change	5.64
GJA1	2697	gap junction protein, alpha 1, 43kDa	2 out of 3	141.984					80.5919	0.0024	fold change	-27.3	61.3919	0.0062	fold change	-4.81
NR5A2	2494	nuclear receptor subfamily 5, group A, member 2	2 out of 3	141.464					78.5324	0.0004	fold change	23.2	62.9319	0.0028	fold change	5.11
MAPK13	5603	mitogen-activated protein kinase 13	2 out of 3	141.367					53.9543	0.0001	fold change	-6.72	87.4126	9.9e-05	fold change	15
RBM24	221662	RNA binding motif protein 24	2 out of 3	141.364					57.2994	0.0002	fold change	7.83	84.0647	0.0006	fold change	-12
CCL15	6359	chemokine (C-C motif) ligand 15	2 out of 3	141.27					77.0559	0.0002	fold change	21.1	64.2145	0.0003	fold change	5.33
AQP3	360	aquaporin 3 (Gill blood group)	2 out of 3	141.266					75.9601	0.0021	fold change	-19.7	65.3057	0.009	fold change	5.52
CTSL1	1514	cathepsin L1	2 out of 3	141.083	98.7147	0.0136	fold change	2.08235					42.3682	0.0001	fold change	-2.93
METTL7B	196410	methyltransferase like 7B	2 out of 3	141.048					83.7212	8e-05	fold change	35.1	57.3263	0.0002	fold change	4.28
AUTS2	26053	autism susceptibility candidate 2	2 out of 3	140.918					60.6951	0.0053	fold change	-9.11	80.2233	0.0003	fold change	9.66
ERAP2	64167	endoplasmic reticulum aminopeptidase 2	2 out of 3	140.862					89.9054	0.0009	fold change	-62.2	50.957	0.001	fold change	-3.61
PVRL3	25945	poliovirus receptor-related 3	2 out of 3	140.693					72.6385	2.5e-05	fold change	-16.6	68.0541	0.0002	fold change	-6.04
ETV1	2115	ets variant 1	2 out of 3	140.637					58.9199	0.0078	fold change	8.48	81.7167	0.0013	fold change	-10.4
IGFBP1	3484	insulin-like growth factor binding protein 1	2 out of 3	140.469					99.6751	6e-05	fold change	611.7	40.7937	0.0058	fold change	-2.83
RGS20	8601	regulator of G-protein signaling 20	2 out of 3	140.18					56.744	0.0011	fold change	-7.65	83.4362	5.8e-05	fold change	-11.5
UGT1A6	54578	UDP glucuronosyltransferase 1 family, polypeptide A6	2 out of 3	140.09					54.9185	0.0084	fold change	-6.96	85.1716	6.4e-06	fold change	12.8
GNG11	2791	guanine nucleotide binding protein (G protein), gamma 11	2 out of 3	140.078					48.0866	0.014	fold change	5.44	91.9912	0.0005	fold change	-23.5
FAM84A	151354	family with sequence similarity 84, member A	2 out of 3	139.649					46.259	3.9e-05	fold change	-5.08	93.3899	0.002	fold change	27.9
IFI16	3428	interferon, gamma-inducible protein 16	2 out of 3	139.406					42.559	0.0216	fold change	-4.49	96.8467	3.5e-07	fold change	-45
TSPAN12	23554	tetraspanin 12	2 out of 3	139.238					84.2943	5e-05	fold change	-37.7	54.9432	0.0006	fold change	4.01
FBP1	2203	fructose-1,6-bisphosphatase 1	2 out of 3	139.015					58.9484	0.0052	fold change	8.5	80.0666	0.0002	fold change	9.64
HPCAL1	3241	hippocalcin-like 1	2 out of 3	138.881					70.6754	0.0002	fold change	15.1	68.2054	0.0004	fold change	-6.06
FAM198B	51313	family with sequence similarity 198, member B	2 out of 3	138.445					41.9777	0.0014	fold change	-4.4	96.4674	0.0002	fold change	43.4
MYO1A	4640	myosin IA	2 out of 3	138.34					72.2972	0.0025	fold change	16.4	66.0432	9.2e-05	fold change	5.63
DLG1	1739	discs, large homolog 1 (Drosophila)	2 out of 3	138.294	93.1064	0.0493	fold change	-1.49019	45.1875	0.0106	fold change	-4.91
CDH1	999	cadherin 1, type 1, E-cadherin (epithelial)	2 out of 3	137.94					40.246	0.0055	fold change	-4.12	97.6944	0.0001	fold change	56.8
CCL20	6364	chemokine (C-C motif) ligand 20	2 out of 3	137.719	99.5124	0.0274	fold change	3.58433					38.2067	0.0028	fold change	2.67
A1CF	29974	APOBEC1 complementation factor	2 out of 3	137.266					62.6433	0.0393	fold change	10.1	74.6224	0.0034	fold change	7.72
ABCA1	19	ATP-binding cassette, sub-family A (ABC1), member 1	2 out of 3	137.061					64.7216	0.0351	fold change	-11.2	72.339	8.6e-05	fold change	-7.2
ALDH3A1	218	aldehyde dehydrogenase 3 family, member A1	2 out of 3	137.027					43.8496	0.0154	fold change	-4.69	93.1775	2.9e-05	fold change	27.7
EXPH5	23086	exophilin 5	2 out of 3	136.678					72.1272	0.0002	fold change	-16.2	64.5511	0.0088	fold change	5.39
TIAM1	7074	T-cell lymphoma invasion and metastasis 1	2 out of 3	136.657					80.3807	9.5e-05	fold change	-26.8	56.2765	9e-05	fold change	-4.15
NOSTRIN	115677	nitric oxide synthase trafficker	2 out of 3	136.532					75.3545	6.4e-05	fold change	19.1	61.1778	9.5e-05	fold change	4.79
SPINK1	6690	serine peptidase inhibitor, Kazal type 1	2 out of 3	136.358					40.4181	6.4e-05	fold change	4.15	95.9398	3e-05	fold change	40.8
AKAP12	9590	A kinase (PRKA) anchor protein 12	2 out of 3	136.185					43.5699	0.0135	fold change	4.67	92.6149	0.0009	fold change	-25.8
NUDT12	83594	nudix (nucleoside diphosphate linked moiety X)-type motif 12	2 out of 3	136.041	94.2489	0.0141	fold change	-1.52545					41.792	0.0077	fold change	2.89
SCD5	79966	stearoyl-CoA desaturase 5	2 out of 3	135.479					56.7962	0.0002	fold change	-7.66	78.6832	0.0022	fold change	-8.97
MSLN	10232	mesothelin	2 out of 3	135.43					43.8496	0.0192	fold change	4.69	91.5801	0.0005	fold change	21.7
PIP5K1B	8395	phosphatidylinositol-4-phosphate 5-kinase, type I, beta	2 out of 3	135.213					60.905	0.0163	fold change	9.17	74.3075	0.0089	fold change	7.67
SLC1A1	6505	solute carrier family 1 (neuronal/epithelial high affinity glutamate transporter, system Xag), member 1	2 out of 3	134.955					55.8672	0.0128	fold change	7.29	79.0876	0.0005	fold change	9.19
FGFR2	2263	fibroblast growth factor receptor 2	2 out of 3	134.92					79.755	1.8e-05	fold change	-25.1	55.1651	0.0012	fold change	4.03
GRB14	2888	growth factor receptor-bound protein 14	2 out of 3	134.89					53.7658	0.036	fold change	6.66	81.1241	3.1e-05	fold change	10.1
AU144815	NA		2 out of 3	134.881	99.1926	0.0272	fold change	-2.43627	35.6888	0.003	fold change	-3.57
CAV1	857	caveolin 1, caveolae protein, 22kDa	2 out of 3	134.686					43.8496	0.0008	fold change	-4.69	90.8364	7.3e-05	fold change	-20.5
TMEFF1	8577	transmembrane protein with EGF-like and two follistatin-like domains 1	2 out of 3	134.651					46.4861	0.0393	fold change	-5.13	88.1648	6.5e-05	fold change	-15.7
ST3GAL6	10402	ST3 beta-galactoside alpha-2,3-sialyltransferase 6	2 out of 3	134.483					84.0068	2e-05	fold change	-36.4	50.476	0.0003	fold change	-3.56
TM4SF20	79853	transmembrane 4 L six family member 20	2 out of 3	134.389					79.4458	0.033	fold change	24.3	54.9432	0.0014	fold change	4.01
PTGIS	5740	prostaglandin I2 (prostacyclin) synthase	2 out of 3	134.352					91.1046	3.7e-08	fold change	74.3	43.2477	0.0003	fold change	-2.99
SHISA2	387914	shisa homolog 2 (Xenopus laevis)	2 out of 3	134.098					90.6355	0.0002	fold change	-68.3	43.462	0.0052	fold change	3.01
DNAJC22	79962	DnaJ (Hsp40) homolog, subfamily C, member 22	2 out of 3	134.057					56.6136	0.0076	fold change	7.62	77.4437	0.0082	fold change	8.52
234986_at	NA		2 out of 3	134.03					72.6385	0.015	fold change	-16.6	61.3919	0.0014	fold change	-4.81
SLC40A1	30061	solute carrier family 40 (iron-regulated transporter), member 1	2 out of 3	133.695					46.7159	0.0177	fold change	5.16	86.9792	0.0003	fold change	14.8
TRPC1	7220	transient receptor potential cation channel, subfamily C, member 1	2 out of 3	133.679					68.1292	0.001	fold change	13.2	65.5497	0.0058	fold change	-5.54
MCOLN3	55283	mucolipin 3	2 out of 3	133.67					65.2367	0.0001	fold change	-11.5	68.4332	0.002	fold change	-6.1
FADS1	3992	fatty acid desaturase 1	2 out of 3	133.428					69.2809	0.0049	fold change	-14.1	64.147	0.0042	fold change	-5.32
LOXL2	4017	lysyl oxidase-like 2	2 out of 3	133.397					36.0129	0.0152	fold change	-3.6	97.3843	1.3e-05	fold change	-54.7
GPR56	9289	G protein-coupled receptor 56	2 out of 3	133.269					90.3685	0.0006	fold change	-66.9	42.9008	0.0013	fold change	2.97
1563498_s_at	NA		2 out of 3	133.08					55.5389	0.0208	fold change	7.17	77.541	0.0017	fold change	8.54
EPS8L3	79574	EPS8-like 3	2 out of 3	132.982					71.498	8.2e-05	fold change	15.7	61.484	0.0033	fold change	4.82
HOOK1	51361	hook homolog 1 (Drosophila)	2 out of 3	132.804					65.2367	0.0003	fold change	-11.5	67.5676	0.0017	fold change	5.97
VAV3	10451	vav 3 guanine nucleotide exchange factor	2 out of 3	132.616					73.9492	0.0013	fold change	-17.7	58.6669	0.0056	fold change	4.46
ZC3H12C	85463	zinc finger CCCH-type containing 12C	2 out of 3	132.608					83.8349	0.0006	fold change	-35.5	48.7734	0.0027	fold change	-3.44
COL6A1	1291	collagen, type VI, alpha 1	2 out of 3	132.537					55.2395	0.018	fold change	7.05	77.2977	0.0018	fold change	-8.44
FERMT1	55612	fermitin family member 1	2 out of 3	132.512	93.3184	0.0039	fold change	1.49949					39.1936	0.008	fold change	2.74
TCN1	6947	transcobalamin I (vitamin B12 binding protein, R binder family)	2 out of 3	132.414					52.1904	0.0041	fold change	-6.31	80.2233	0.0018	fold change	9.66
OLFML2A	169611	olfactomedin-like 2A	2 out of 3	132.224					63.4848	0.0002	fold change	-10.5	68.7389	0.0004	fold change	-6.22
TC2N	123036	tandem C2 domains, nuclear	2 out of 3	132.212					50.873	0.0017	fold change	-6.02	81.3392	0.0008	fold change	10.2
MMP28	79148	matrix metallopeptidase 28	2 out of 3	132.167					38.2067	0.0168	fold change	-3.87	93.9602	0.0002	fold change	29.4
GJB2	2706	gap junction protein, beta 2, 26kDa	2 out of 3	132.148					48.3134	0.035	fold change	-5.47	83.8349	0.0014	fold change	11.9
OGFRL1	79627	opioid growth factor receptor-like 1	2 out of 3	132.041					35.2689	9.9e-05	fold change	-3.52	96.7717	0.0004	fold change	-44.9
SYBU	55638	syntabulin (syntaxin-interacting)	2 out of 3	131.778					68.1292	0.0069	fold change	13.2	63.6489	0.0004	fold change	5.22
GCLM	2730	glutamate-cysteine ligase, modifier subunit	2 out of 3	131.582					73.3321	0.0207	fold change	-17.2	58.2499	0.0003	fold change	-4.4
ARHGAP5	394	Rho GTPase activating protein 5	2 out of 3	131.484	90.1697	0.0019	fold change	-1.41772					41.3145	0.0193	fold change	2.86
CDC42EP3	10602	CDC42 effector protein (Rho GTPase binding) 3	2 out of 3	131.461					85.2893	0.0001	fold change	-40.1	46.1719	0.0001	fold change	-3.24
C15orf48	84419	chromosome 15 open reading frame 48	2 out of 3	131.337					81.2308	0.008	fold change	-28.9	50.1057	0.0004	fold change	-3.54
HOTAIR	100124700	HOX transcript antisense RNA	2 out of 3	131.314					76.1487	0.0098	fold change	20.2	55.1651	0.0053	fold change	4.03
TMC4	147798	transmembrane channel-like 4	2 out of 3	131.246					50.6006	0.0044	fold change	-5.94	80.6452	4.3e-05	fold change	9.81
PNMA2	10687	paraneoplastic Ma antigen 2	2 out of 3	131.209					91.1727	0.0034	fold change	74.8	40.0362	0.001	fold change	-2.79
TNFRSF11A	8792	tumor necrosis factor receptor superfamily, member 11a, NFKB activator	2 out of 3	131.167					55.7656	0.0025	fold change	7.24	75.4011	0.0017	fold change	7.84
230772_at	NA		2 out of 3	130.77					66.7236	0.0038	fold change	12.4	64.0467	0.0003	fold change	5.3
FRY	10129	furry homolog (Drosophila)	2 out of 3	130.748					69.8724	0.0004	fold change	-14.6	60.8754	0.0005	fold change	4.75
SERPINE2	5270	serpin peptidase inhibitor, clade E (nexin, plasminogen activator inhibitor type 1), member 2	2 out of 3	130.278					53.4154	0.001	fold change	6.57	76.8628	0.0001	fold change	8.31
BG540494	NA		2 out of 3	130.266					65.2367	0.0257	fold change	11.5	65.0297	0.0006	fold change	5.46
HSPB8	26353	heat shock 22kDa protein 8	2 out of 3	130.168					63.9468	0.0014	fold change	-10.7	66.2208	3.4e-05	fold change	-5.67
SSTR5-AS1	146336	SSTR5 antisense RNA 1	2 out of 3	130.067					70.92	0.0018	fold change	15.3	59.1471	0.0005	fold change	4.52
SGK2	10110	serum/glucocorticoid regulated kinase 2	2 out of 3	129.785					51.7513	0.0251	fold change	6.21	78.0336	0.0036	fold change	8.63
RGS2	5997	regulator of G-protein signaling 2, 24kDa	2 out of 3	129.692					39.4577	0.005	fold change	4.02	90.2348	0.0013	fold change	18.9
IL2RG	3561	interleukin 2 receptor, gamma	2 out of 3	129.665					46.1719	0.0107	fold change	5.07	83.4934	0.0047	fold change	11.6
EPCAM	4072	epithelial cell adhesion molecule	2 out of 3	129.646					31.4838	9.8e-05	fold change	3.14	98.1624	0.0017	fold change	64.7
FOXQ1	94234	forkhead box Q1	2 out of 3	129.458					40.1407	0.0206	fold change	-4.1	89.3176	0.0002	fold change	17.6
MCTP1	79772	multiple C2 domains, transmembrane 1	2 out of 3	129.197					69.1257	0.0001	fold change	-14	60.0716	4.1e-05	fold change	-4.66
TLE4	7091	transducin-like enhancer of split 4 (E(sp1) homolog, Drosophila)	2 out of 3	129.187					72.1272	0.001	fold change	-16.2	57.06	0.0014	fold change	-4.24
KRT23	25984	keratin 23 (histone deacetylase inducible)	2 out of 3	128.884					35.6369	0.0149	fold change	-3.56	93.247	0.0001	fold change	27.8
ANAPC16	119504	anaphase promoting complex subunit 16	2 out of 3	128.781					98.4775	7.4e-06	fold change	297.9	30.3039	0.0081	fold change	2.22
USH1C	10083	Usher syndrome 1C (autosomal recessive, severe)	2 out of 3	128.711					81.0163	0.0038	fold change	28.3	47.6949	0.0002	fold change	3.35
IGFBP6	3489	insulin-like growth factor binding protein 6	2 out of 3	128.419					45.3206	0.0081	fold change	-4.93	83.0979	0.0003	fold change	-11.3
AA702409	NA		2 out of 3	128.298					61.0262	0.009	fold change	-9.26	67.2721	0.0017	fold change	5.88
GRHL2	79977	grainyhead-like 2 (Drosophila)	2 out of 3	128.12					67.7534	0.0162	fold change	-13	60.3668	0.0042	fold change	4.7
COL13A1	1305	collagen, type XIII, alpha 1	2 out of 3	127.967					54.7232	0.002	fold change	6.92	73.244	0.0026	fold change	-7.4
MME	4311	membrane metallo-endopeptidase	2 out of 3	127.942					80.4868	1.8e-06	fold change	-27.1	47.4554	0.002	fold change	-3.33
F5	2153	coagulation factor V (proaccelerin, labile factor)	2 out of 3	127.53					36.2892	0.0012	fold change	3.63	91.2409	0.0003	fold change	21.1
PRSS2	5645	protease, serine, 2 (trypsin 2)	2 out of 3	127.495					41.8491	0.0013	fold change	4.38	85.6458	4.9e-06	fold change	13.3
CDK14	5218	cyclin-dependent kinase 14	2 out of 3	127.095					68.6238	0.0004	fold change	-13.6	58.4713	0.0013	fold change	-4.44
BF111326	NA		2 out of 3	127.012					55.9691	7.6e-05	fold change	-7.35	71.0429	5.6e-05	fold change	-6.8
TRIM23	373	tripartite motif containing 23	2 out of 3	126.939	96.9236	0.0435	fold change	-1.66644					30.0154	0.0135	fold change	-2.21
PTPN13	5783	protein tyrosine phosphatase, non-receptor type 13 (APO-1/CD95 (Fas)-associated phosphatase)	2 out of 3	126.605					84.5266	0.0012	fold change	-38.5	42.0783	0.0115	fold change	-2.91
FAM101B	359845	family with sequence similarity 101, member B	2 out of 3	126.509					30.1183	0.0016	fold change	-3	96.3911	0.0009	fold change	-42.6
CTHRC1	115908	collagen triple helix repeat containing 1	2 out of 3	126.437					85.8856	3.6e-06	fold change	-41.2	40.5512	0.0065	fold change	-2.82
BM873997	NA		2 out of 3	126.005					80.7507	0.0012	fold change	-27.7	45.2542	0.0482	fold change	-3.16
VCAN	1462	versican	2 out of 3	125.997					98.5552	5.7e-05	fold change	323.5	27.4422	0.0101	fold change	-2.09
MSRB3	253827	methionine sulfoxide reductase B3	2 out of 3	125.875					32.2013	0.0162	fold change	3.21	93.6733	0.0001	fold change	-28.5
SCIN	85477	scinderin	2 out of 3	125.701					31.5972	0.0127	fold change	3.15	94.1035	1.3e-05	fold change	29.8
SQLE	6713	squalene epoxidase	2 out of 3	125.686	96.7717	0.0032	fold change	-1.65297					28.9139	0.0048	fold change	-2.16
ABP1	26	amiloride binding protein 1 (amine oxidase (copper-containing))	2 out of 3	125.666					32.5597	0.0062	fold change	3.25	93.1064	4.9e-05	fold change	27.6
KALRN	8997	kalirin, RhoGEF kinase	2 out of 3	125.604					55.091	0.0063	fold change	7.02	70.5129	0.0012	fold change	6.63
MUC20	200958	mucin 20, cell surface associated	2 out of 3	125.395					32.4994	0.0301	fold change	-3.24	92.8954	7e-07	fold change	26.8
GPRC5A	9052	G protein-coupled receptor, family C, group 5, member A	2 out of 3	125.26	98.1624	0.0412	fold change	-1.7932	27.0973	0.0165	fold change	2.72
PDZK1IP1	10158	PDZK1 interacting protein 1	2 out of 3	124.896					77.201	0.0221	fold change	21.2	47.6949	0.0002	fold change	3.35
LOC730102	730102	quinone oxidoreductase-like protein 2 pseudogene	2 out of 3	124.807					68.1673	6.4e-06	fold change	13.3	56.6393	0.0035	fold change	4.18
HNMT	3176	histamine N-methyltransferase	2 out of 3	124.789					46.5567	0.0009	fold change	5.14	78.2326	4.6e-05	fold change	8.75
FXYD5	53827	FXYD domain containing ion transport regulator 5	2 out of 3	124.769	93.3899	0.0136	fold change	1.49965					31.3792	0.0032	fold change	-2.27
CSRP2	1466	cysteine and glycine-rich protein 2	2 out of 3	124.69					68.1292	0.0011	fold change	-13.2	56.5611	0.0088	fold change	-4.17
ARMCX3	51566	armadillo repeat containing, X-linked 3	2 out of 3	124.609					66.688	0.0002	fold change	-12.3	57.9206	0.0021	fold change	-4.37
IL33	90865	interleukin 33	2 out of 3	124.532					72.2972	0.0045	fold change	-16.4	52.2346	0.0218	fold change	3.75
RASSF8	11228	Ras association (RalGDS/AF-6) domain family (N-terminal) member 8	2 out of 3	124.513					73.6399	0.0001	fold change	-17.4	50.873	0.006	fold change	-3.6
KLK10	5655	kallikrein-related peptidase 10	2 out of 3	124.483					31.0936	0.0004	fold change	3.11	93.3899	5.9e-05	fold change	27.9
MTSS1	9788	metastasis suppressor 1	2 out of 3	124.475					77.3467	0.0007	fold change	-21.3	47.128	0.0107	fold change	-3.31
TFF1	7031	trefoil factor 1	2 out of 3	124.377					27.7582	0.0349	fold change	-2.78	96.6184	0.0004	fold change	43.8
DSC2	1824	desmocollin 2	2 out of 3	124.372					64.8239	0.0007	fold change	11.3	59.5479	0.0005	fold change	4.58
MYO5A	4644	myosin VA (heavy chain 12, myoxin)	2 out of 3	124.298					77.688	0.0002	fold change	-22	46.6096	0.002	fold change	-3.28
PIR	8544	pirin (iron-binding nuclear protein)	2 out of 3	124.104					73.7724	0.0137	fold change	-17.6	50.3312	0.0004	fold change	-3.55
EPPK1	83481	epiplakin 1	2 out of 3	123.936					50.2079	0.0124	fold change	-5.8	73.7278	0.0033	fold change	7.53
PLOD2	5352	procollagen-lysine, 2-oxoglutarate 5-dioxygenase 2	2 out of 3	123.881					90.9025	2.3e-05	fold change	-72.6	32.9789	0.0007	fold change	-2.36
SNAPC1	6617	small nuclear RNA activating complex, polypeptide 1, 43kDa	2 out of 3	123.819					43.3851	0.0026	fold change	-4.65	80.4337	2.2e-05	fold change	-9.76
SNURF	8926	SNRPN upstream reading frame	2 out of 3	123.718					49.9022	0.0002	fold change	-5.76	73.816	0.0025	fold change	7.55
MACC1	346389	metastasis associated in colon cancer 1	2 out of 3	123.711					56.3279	0.0015	fold change	-7.51	67.3827	0.0003	fold change	5.94
Z83838	NA		2 out of 3	123.687					48.9289	0.0012	fold change	-5.59	74.7585	8.6e-05	fold change	7.73
241925_x_at	NA		2 out of 3	123.681					65.3757	0.0043	fold change	-11.6	58.305	0.0065	fold change	-4.41
FAM92A1	137392	family with sequence similarity 92, member A1	2 out of 3	123.653					32.2774	0.0247	fold change	-3.22	91.3759	0.001	fold change	-21.4
TRIM31	11074	tripartite motif containing 31	2 out of 3	123.576					41.7495	0.035	fold change	4.36	81.8264	0.0005	fold change	10.5
AP1S2	8905	adaptor-related protein complex 1, sigma 2 subunit	2 out of 3	123.547					45.7595	0.0023	fold change	5	77.7871	0.0015	fold change	-8.6
IL8	3576	interleukin 8	2 out of 3	123.547					45.7595	0.0176	fold change	-5	77.7871	0.0045	fold change	-8.6
Hs.687855	NA		2 out of 3	123.542	98.0834	0.0217	fold change	-1.79199	25.4586	0.011	fold change	-2.59
OPN3	23596	opsin 3	2 out of 3	123.44					52.1904	0.0002	fold change	6.31	71.2494	0.003	fold change	6.84
CABLES1	91768	Cdk5 and Abl enzyme substrate 1	2 out of 3	123.361					41.4261	0.0081	fold change	4.32	81.935	6.9e-06	fold change	10.6
ACSM3	6296	acyl-CoA synthetase medium-chain family member 3	2 out of 3	123.327					76.4327	0.0012	fold change	20.5	46.8942	0.0002	fold change	3.3
PRKAR2B	5577	protein kinase, cAMP-dependent, regulatory, type II, beta	2 out of 3	123.118					42.2083	0.0417	fold change	-4.45	80.9101	2.3e-05	fold change	-9.92
F2RL1	2150	coagulation factor II (thrombin) receptor-like 1	2 out of 3	123.049					33.9254	0.0155	fold change	3.38	89.1234	0.0009	fold change	17.1
TMEM246	84302	transmembrane protein 246	2 out of 3	122.978					83.3806	3.9e-05	fold change	-33.2	39.5977	0.0002	fold change	-2.76
CKAP4	10970	cytoskeleton-associated protein 4	2 out of 3	122.819					60.3668	0.0021	fold change	-8.99	62.4524	7.4e-05	fold change	-5.04
ADRB2	154	adrenoceptor beta 2, surface	2 out of 3	122.805					70.3918	0.0002	fold change	-14.9	52.4131	0.0025	fold change	-3.76
AKR1B1	231	aldo-keto reductase family 1, member B1 (aldose reductase)	2 out of 3	122.593					91.4445	1e-05	fold change	-76.8	31.1488	0.0002	fold change	-2.26
1552703_s_at	NA		2 out of 3	122.583					90.1697	4.6e-05	fold change	-66.2	32.4137	0.0166	fold change	-2.33
KRT7	3855	keratin 7	2 out of 3	122.45					79.5494	0.0028	fold change	-24.7	42.9008	0.0151	fold change	2.97
VGLL3	389136	vestigial like 3 (Drosophila)	2 out of 3	122.154					31.785	0.0089	fold change	3.17	90.3685	0.0006	fold change	19.1
LOC729680	729680	uncharacterized LOC729680	2 out of 3	122.083					61.0568	0.0057	fold change	-9.27	61.0262	0.0008	fold change	4.77
TESC	54997	tescalcin	2 out of 3	121.963					40.246	0.0106	fold change	4.12	81.7167	0.0002	fold change	10.4
HEG1	57493	HEG homolog 1 (zebrafish)	2 out of 3	121.882					39.007	0.0155	fold change	-3.97	82.8748	0.0006	fold change	-11.2
MEF2C	4208	myocyte enhancer factor 2C	2 out of 3	121.871	95.9398	0.026	fold change	-1.60095					25.9312	8.2e-05	fold change	2.02
TM4SF18	116441	transmembrane 4 L six family member 18	2 out of 3	121.748					90.3685	0.0033	fold change	66.9	31.3792	0.0007	fold change	-2.27
ZCCHC24	219654	zinc finger, CCHC domain containing 24	2 out of 3	121.639					56.8492	0.0002	fold change	-7.67	64.7895	0.0039	fold change	-5.42
DOCK4	9732	dedicator of cytokinesis 4	2 out of 3	121.589					34.6719	0.032	fold change	-3.46	86.9172	0.002	fold change	-14.7
IGFBP2	3485	insulin-like growth factor binding protein 2, 36kDa	2 out of 3	121.526					75.3545	0.0001	fold change	-19.1	46.1719	0.0014	fold change	-3.24
SRGN	5552	serglycin	2 out of 3	121.327					96.695	0.0009	fold change	-173	24.6321	0.0152	fold change	-1.96
XYLT1	64131	xylosyltransferase I	2 out of 3	121.154					76.1487	0.0014	fold change	20.2	45.0053	0.0242	fold change	3.13
SAMHD1	25939	SAM domain and HD domain 1	2 out of 3	121.106					47.862	0.0017	fold change	-5.39	73.244	0.0075	fold change	-7.4
231067_s_at	NA		2 out of 3	120.982					45.8106	0.0009	fold change	5.01	75.171	0.0042	fold change	-7.82
MSX1	4487	msh homeobox 1	2 out of 3	120.85					46.3637	0.0063	fold change	-5.11	74.4868	0.0067	fold change	-7.7
EFNA2	1943	ephrin-A2	2 out of 3	120.552					56.4054	0.0171	fold change	7.53	64.147	0.0004	fold change	5.32
ARL4C	10123	ADP-ribosylation factor-like 4C	2 out of 3	120.424					43.9908	0.0061	fold change	4.71	76.4327	2.7e-05	fold change	-8.11
C4orf19	55286	chromosome 4 open reading frame 19	2 out of 3	120.364					53.5315	0.0025	fold change	-6.6	66.8324	0.0007	fold change	5.82
LRRC8C	84230	leucine rich repeat containing 8 family, member C	2 out of 3	120.362					86.7333	0.0013	fold change	-44.5	33.6286	0.0036	fold change	-2.4
GPX2	2877	glutathione peroxidase 2 (gastrointestinal)	2 out of 3	120.153					22.6906	0.0291	fold change	-2.37	97.4621	3e-05	fold change	55
ZNF850	342892	zinc finger protein 850	2 out of 3	120.069					60.6649	0.0005	fold change	-9.1	59.4043	0.0017	fold change	-4.57
TNIK	23043	TRAF2 and NCK interacting kinase	2 out of 3	120.019					38.3021	0.0069	fold change	3.88	81.7167	3.4e-05	fold change	10.4
KRTCAP3	200634	keratinocyte associated protein 3	2 out of 3	120.016					51.0845	0.0115	fold change	-6.06	68.9313	0.0004	fold change	6.29
ZNF521	25925	zinc finger protein 521	2 out of 3	120.008					82.7623	0.0056	fold change	32.2	37.2459	0.0033	fold change	-2.61
PALM2-AKAP2	445815	PALM2-AKAP2 readthrough	2 out of 3	119.932					73.551	0.0046	fold change	17.3	46.3809	0.0004	fold change	3.26
RAB38	23682	RAB38, member RAS oncogene family	2 out of 3	119.887					74.5323	7.3e-05	fold change	-18.2	45.3544	0.0001	fold change	3.17
ALCAM	214	activated leukocyte cell adhesion molecule	2 out of 3	119.521					82.8748	0.0027	fold change	-32.3	36.6464	0.0003	fold change	-2.58
SYK	6850	spleen tyrosine kinase	2 out of 3	119.417					40.8343	0.0036	fold change	-4.21	78.583	2.5e-05	fold change	8.9
TACSTD2	4070	tumor-associated calcium signal transducer 2	2 out of 3	119.336					99.9181	7.3e-06	fold change	-1390	19.4179	0.0157	fold change	1.73
GPR110	266977	G protein-coupled receptor 110	2 out of 3	119.251					31.3393	0.0021	fold change	3.13	87.9121	7.7e-05	fold change	15.4
MAP1B	4131	microtubule-associated protein 1B	2 out of 3	118.926					25.0386	0.0143	fold change	-2.55	93.8879	5.6e-05	fold change	-28.8
HPGD	3248	hydroxyprostaglandin dehydrogenase 15-(NAD)	2 out of 3	118.543					19.8282	0.0404	fold change	-2.16	98.7147	2.4e-05	fold change	86.6
238808_at	NA		2 out of 3	118.493					59.2038	0.0004	fold change	8.61	59.2895	0.0021	fold change	4.55
ZNF738	148203	zinc finger protein 738	2 out of 3	118.39	91.1727	0.0026	fold change	-1.44843	27.2174	0.0403	fold change	-2.73
STARD10	10809	StAR-related lipid transfer (START) domain containing 10	2 out of 3	118.371					39.7384	0.0034	fold change	-4.05	78.6324	0.0011	fold change	8.92
FOXA2	3170	forkhead box A2	2 out of 3	118.329					49.282	6e-05	fold change	-5.65	69.0474	2.9e-05	fold change	6.31
LNX1	84708	ligand of numb-protein X 1, E3 ubiquitin protein ligase	2 out of 3	118.322					59.0898	8e-06	fold change	-8.55	59.2326	0.0007	fold change	4.53
SIDT1	54847	SID1 transmembrane family, member 1	2 out of 3	118.243					52.0578	0.0002	fold change	-6.27	66.1848	0.0007	fold change	5.64
SYT13	57586	synaptotagmin XIII	2 out of 3	118.135					41.176	0.0407	fold change	4.27	76.9586	0.0014	fold change	8.33
GLDN	342035	gliomedin	2 out of 3	118.118					37.7376	0.0016	fold change	-3.82	80.3807	0.0001	fold change	9.73
PPAP2B	8613	phosphatidic acid phosphatase type 2B	2 out of 3	118.07					57.7027	0.0054	fold change	-7.96	60.3668	0.0007	fold change	-4.7
226756_at	NA		2 out of 3	118.066					28.0945	0.0001	fold change	2.81	89.9717	0.0003	fold change	-18.5
GIPC2	54810	GIPC PDZ domain containing family, member 2	2 out of 3	117.92					71.7484	0.0033	fold change	-15.9	46.1719	0.0025	fold change	3.24
S100A14	57402	S100 calcium binding protein A14	2 out of 3	117.689					56.0199	0.0128	fold change	-7.38	61.669	0.0013	fold change	4.86
FOXA1	3169	forkhead box A1	2 out of 3	117.587					53.069	0.0193	fold change	-6.52	64.5178	0.0011	fold change	5.38
PTGFRN	5738	prostaglandin F2 receptor negative regulator	2 out of 3	117.277					78.3318	0.0034	fold change	-23	38.9454	0.0054	fold change	2.72
TUSC1	286319	tumor suppressor candidate 1	2 out of 3	116.985					72.339	0.0025	fold change	-16.5	44.646	0.0007	fold change	-3.1
SMARCA1	6594	SWI/SNF related, matrix associated, actin dependent regulator of chromatin, subfamily a, member 1	2 out of 3	116.899					87.7239	1.4e-05	fold change	-47.4	29.1748	0.0048	fold change	-2.17
TMPRSS2	7113	transmembrane protease, serine 2	2 out of 3	116.891					61.8246	0.0008	fold change	9.67	55.0661	0.0009	fold change	4.02
NXPE3	91775	neurexophilin and PC-esterase domain family, member 3	2 out of 3	116.657					42.8409	0.0066	fold change	-4.56	73.816	0.0033	fold change	-7.55
VILL	50853	villin-like	2 out of 3	116.624					34.0289	0.0003	fold change	-3.39	82.5955	3.7e-05	fold change	11
TMEM71	137835	transmembrane protein 71	2 out of 3	116.612					69.0093	0.0024	fold change	-13.9	47.6023	0.004	fold change	-3.34
GALNT12	79695	UDP-N-acetyl-alpha-D-galactosamine:polypeptide N-acetylgalactosaminyltransferase 12 (GalNAc-T12)	2 out of 3	116.436					38.3021	0.0004	fold change	-3.88	78.1335	0.0006	fold change	8.68
DFNA5	1687	deafness, autosomal dominant 5	2 out of 3	116.241					45.6067	0.0002	fold change	-4.98	70.6344	0.0004	fold change	-6.66
LIX1L	128077	Lix1 homolog (mouse)-like	2 out of 3	116.037					44.5812	0.0196	fold change	4.82	71.4561	0.0065	fold change	-6.92
ARRDC4	91947	arrestin domain containing 4	2 out of 3	115.991					44.9067	0.0127	fold change	-4.87	71.0843	0.0007	fold change	6.81
CDHR5	53841	cadherin-related family member 5	2 out of 3	115.941					39.5085	0.0001	fold change	4.03	76.4327	0.0054	fold change	8.11
ADH1C	126	alcohol dehydrogenase 1C (class I), gamma polypeptide	2 out of 3	115.916					88.1011	0.0015	fold change	-50.2	27.8147	0.0118	fold change	2.11
CAP2	10486	CAP, adenylate cyclase-associated protein, 2 (yeast)	2 out of 3	115.831					37.9942	0.0163	fold change	3.85	77.8368	0.0003	fold change	-8.62
241435_at	NA		2 out of 3	115.827					32.9524	0.0287	fold change	-3.29	82.8748	1.6e-05	fold change	-11.2
HGD	3081	homogentisate 1,2-dioxygenase	2 out of 3	115.76					46.5567	0.011	fold change	5.14	69.2032	0.0003	fold change	6.33
LPAR3	23566	lysophosphatidic acid receptor 3	2 out of 3	115.76					70.2711	0.0006	fold change	-14.8	45.4885	0.0168	fold change	-3.18
239148_at	NA		2 out of 3	115.558					39.9712	0.0058	fold change	-4.08	75.5869	0.0006	fold change	7.88
PION	54103	pigeon homolog (Drosophila)	2 out of 3	115.467					58.7227	0.0022	fold change	-8.42	56.744	0.0011	fold change	4.19
TIMP2	7077	TIMP metallopeptidase inhibitor 2	2 out of 3	115.31					60.3668	0.002	fold change	8.99	54.9432	0.0007	fold change	-4.01
UBL3	5412	ubiquitin-like 3	2 out of 3	115.235	92.5446	0.0335	fold change	-1.47549	22.6906	0.0099	fold change	-2.37
TNFSF15	9966	tumor necrosis factor (ligand) superfamily, member 15	2 out of 3	115.066					90.4339	0.0003	fold change	67.5	24.6321	0.0056	fold change	1.96
FGFR4	2264	fibroblast growth factor receptor 4	2 out of 3	115.012					45.9648	0.0082	fold change	5.03	69.0474	0.0002	fold change	6.31
TJP3	27134	tight junction protein 3	2 out of 3	114.943					45.5054	0.0412	fold change	4.96	69.4377	0.0022	fold change	6.4
PLAU	5328	plasminogen activator, urokinase	2 out of 3	114.722					22.5242	0.0115	fold change	-2.36	92.1982	9.6e-05	fold change	-24.2
RASAL2	9462	RAS protein activator like 2	2 out of 3	114.562	96.2408	0.0377	fold change	-1.61548					18.321	0.0018	fold change	-1.68
LARP4	113251	La ribonucleoprotein domain family, member 4	2 out of 3	114.407	89.7747	0.0282	fold change	-1.40946					24.6321	0.0084	fold change	-1.96
PPL	5493	periplakin	2 out of 3	114.302					77.0559	0.008	fold change	-21.1	37.2459	0.0195	fold change	2.61
RSPH1	89765	radial spoke head 1 homolog (Chlamydomonas)	2 out of 3	114.227					68.7389	0.0067	fold change	13.7	45.4885	0.001	fold change	3.18
RIMKLB	57494	ribosomal modification protein rimK-like family member B	2 out of 3	114.215					66.1848	1.7e-06	fold change	-12	48.0303	0.0054	fold change	-3.38
AA088446	NA		2 out of 3	114.193					38.7	0.0006	fold change	3.92	75.4933	0.0006	fold change	7.86
BTNL9	153579	butyrophilin-like 9	2 out of 3	114.134					25.7789	0.0056	fold change	2.61	88.3548	2.4e-05	fold change	15.8
PEAR1	375033	platelet endothelial aggregation receptor 1	2 out of 3	114.086					64.8239	0.0008	fold change	11.3	49.2621	0.0042	fold change	-3.49
MVK	4598	mevalonate kinase	2 out of 3	114.076	98.3981	0.0129	fold change	-1.93896					15.6781	0.0133	fold change	-1.56
TMEM156	80008	transmembrane protein 156	2 out of 3	113.967					60.2482	0.0012	fold change	-8.92	53.7184	0.0044	fold change	-3.9
GALNT4	8693	UDP-N-acetyl-alpha-D-galactosamine:polypeptide N-acetylgalactosaminyltransferase 4 (GalNAc-T4)	2 out of 3	113.788					59.0898	5e-05	fold change	8.55	54.6986	0.0027	fold change	3.99
AI252081	NA		2 out of 3	113.718					49.0653	0.0347	fold change	-5.62	64.6529	0.0102	fold change	5.41
SULT1A1	6817	sulfotransferase family, cytosolic, 1A, phenol-preferring, member 1	2 out of 3	113.68					41.4261	0.0006	fold change	4.32	72.2543	0.0003	fold change	7.17
AA725246	NA		2 out of 3	113.604					47.419	0.0003	fold change	-5.3	66.1848	0.0057	fold change	5.64
LOC653602	653602	uncharacterized LOC653602	2 out of 3	113.537					30.439	0.0011	fold change	-3.04	83.0979	7.2e-08	fold change	11.3
NR1H3	10062	nuclear receptor subfamily 1, group H, member 3	2 out of 3	113.476					66.1848	0.0104	fold change	12	47.2912	0.0013	fold change	3.32
ANKRD22	118932	ankyrin repeat domain 22	2 out of 3	113.459					36.7888	0.0127	fold change	-3.7	76.6707	0.0007	fold change	8.22
CTSH	1512	cathepsin H	2 out of 3	113.42					31.703	0.0054	fold change	-3.16	81.7167	5.5e-05	fold change	10.4
SIPA1L2	57568	signal-induced proliferation-associated 1 like 2	2 out of 3	113.41					56.6656	0.008	fold change	-7.63	56.744	0.0016	fold change	4.19
CAMK2N1	55450	calcium/calmodulin-dependent protein kinase II inhibitor 1	2 out of 3	113.349					38.5907	0.0345	fold change	3.91	74.7585	4e-05	fold change	7.73
ABCC4	10257	ATP-binding cassette, sub-family C (CFTR/MRP), member 4	2 out of 3	113.161					61.9487	0.0014	fold change	-9.7	51.2122	0.0106	fold change	-3.64
CLGN	1047	calmegin	2 out of 3	113.068					28.3669	0.0399	fold change	-2.83	84.7013	0.0016	fold change	-12.4
222863_at	NA		2 out of 3	113.048	89.8392	0.019	fold change	-1.41002					23.209	0.0111	fold change	-1.9
ACSL5	51703	acyl-CoA synthetase long-chain family member 5	2 out of 3	113.034					30.439	0.0012	fold change	3.04	82.5955	0.0001	fold change	11
CEACAM6	4680	carcinoembryonic antigen-related cell adhesion molecule 6 (non-specific cross reacting antigen)	2 out of 3	112.883					13.7706	0.0081	fold change	-1.69	99.112	3.4e-06	fold change	124.9
MT1X	4501	metallothionein 1X	2 out of 3	112.88					39.636	0.0136	fold change	-4.04	73.244	0.0002	fold change	-7.4
STK38	11329	serine/threonine kinase 38	2 out of 3	112.838	97.9278	0.0232	fold change	-1.77455					14.9098	0.0156	fold change	-1.52
LIMK2	3985	LIM domain kinase 2	2 out of 3	112.692					43.2934	7.9e-06	fold change	-4.63	69.3982	4.4e-05	fold change	6.37
GALC	2581	galactosylceramidase	2 out of 3	112.532					32.7766	0.002	fold change	3.27	79.755	0.0002	fold change	9.46
PSAP	5660	prosaposin	2 out of 3	112.516					92.0607	5.8e-05	fold change	86.8	20.4552	0.0077	fold change	-1.78
AW450675	NA		2 out of 3	112.501					77.4437	3.9e-05	fold change	-21.7	35.0577	0.0206	fold change	-2.49
SFTA1P	207107	surfactant associated 1, pseudogene	2 out of 3	112.425					41.7495	0.0009	fold change	-4.36	70.6754	0.0018	fold change	-6.68
LGR5	8549	leucine-rich repeat containing G protein-coupled receptor 5	2 out of 3	112.249					63.6489	0.0166	fold change	10.6	48.5998	0.0053	fold change	3.43
ODF2L	57489	outer dense fiber of sperm tails 2-like	2 out of 3	112.163					70.2711	0.0013	fold change	-14.8	41.8918	0.0044	fold change	-2.9
CCDC68	80323	coiled-coil domain containing 68	2 out of 3	111.985					65.3757	0.0002	fold change	11.6	46.6096	0.0012	fold change	3.28
SORL1	6653	sortilin-related receptor, L(DLR class) A repeats containing	2 out of 3	111.908					35.3804	1e-05	fold change	3.53	76.5275	0.0018	fold change	8.17
ABCG2	9429	ATP-binding cassette, sub-family G (WHITE), member 2	2 out of 3	111.866					93.3184	0.0001	fold change	97.6	18.5476	0.0114	fold change	1.69
ZNF704	619279	zinc finger protein 704	2 out of 3	111.69					85.1716	0.0026	fold change	-40	26.5186	0.0038	fold change	2.05
PLLP	51090	plasmolipin	2 out of 3	111.659					34.458	0.0041	fold change	-3.44	77.201	0.0002	fold change	8.39
RAB31	11031	RAB31, member RAS oncogene family	2 out of 3	111.616					37.6223	0.0339	fold change	3.8	73.9941	1.3e-05	fold change	-7.59
AKT3	10000	v-akt murine thymoma viral oncogene homolog 3 (protein kinase B, gamma)	2 out of 3	111.565					34.1707	0.0028	fold change	-3.41	77.3946	1.7e-05	fold change	-8.48
TNFRSF25	8718	tumor necrosis factor receptor superfamily, member 25	2 out of 3	111.55	94.32	0.0476	fold change	1.52937	17.2296	0.0282	fold change	-1.95
KRT19	3880	keratin 19	2 out of 3	111.549					11.794	0.0068	fold change	1.54	99.7546	1.4e-06	fold change	208.6
BF221850	NA		2 out of 3	111.547	89.9717	0.045	fold change	-1.41121	21.5753	0.0324	fold change	-2.29
ST14	6768	suppression of tumorigenicity 14 (colon carcinoma)	2 out of 3	111.399					21.8865	0.0016	fold change	2.31	89.5127	2.5e-05	fold change	17.7
MICAL2	9645	microtubule associated monoxygenase, calponin and LIM domain containing 2	2 out of 3	111.365					74.5323	0.0053	fold change	18.2	36.833	0.0013	fold change	2.59
NMT2	9397	N-myristoyltransferase 2	2 out of 3	111.193					47.6763	0.005	fold change	5.35	63.5171	0.0011	fold change	-5.2
KIRREL	55243	kin of IRRE like (Drosophila)	2 out of 3	111.187					48.7348	0.0062	fold change	5.54	62.4524	0.0003	fold change	-5.04
CGN	57530	cingulin	2 out of 3	110.91					51.3616	0.0204	fold change	6.13	59.5479	0.0103	fold change	4.58
RBMS3	27303	RNA binding motif, single stranded interacting protein 3	2 out of 3	110.505					69.0093	6.6e-05	fold change	-13.9	41.4958	0.0122	fold change	-2.87
MT2A	4502	metallothionein 2A	2 out of 3	110.497					37.0774	0.0149	fold change	-3.73	73.4193	0.0012	fold change	-7.46
242153_at	NA		2 out of 3	110.492	94.9037	0.017	fold change	-1.54117	15.5886	0.0201	fold change	-1.83
ECI2	10455	enoyl-CoA delta isomerase 2	2 out of 3	110.198					46.0507	0.0005	fold change	5.05	64.147	0.0015	fold change	-5.32
ASL	435	argininosuccinate lyase	2 out of 3	110.159					49.1637	0.001	fold change	5.63	60.9957	0.0001	fold change	4.76
CLDN4	1364	claudin 4	2 out of 3	110.151					26.03	0.0001	fold change	2.63	84.1213	3e-05	fold change	12.1
ARHGDIB	397	Rho GDP dissociation inhibitor (GDI) beta	2 out of 3	110.118					92.8954	7.2e-05	fold change	-96.4	17.2223	0.0319	fold change	-1.63
CDKN2A	1029	cyclin-dependent kinase inhibitor 2A	2 out of 3	109.97					91.6489	0.009	fold change	79.5	18.321	0.0004	fold change	-1.68
SH2B3	10019	SH2B adaptor protein 3	2 out of 3	109.955					37.5302	0.0164	fold change	3.79	72.4249	9.1e-05	fold change	-7.21
OXTR	5021	oxytocin receptor	2 out of 3	109.942	99.2713	0.0217	fold change	-2.51617					10.6708	0.0075	fold change	1.27
MAP7	9053	microtubule-associated protein 7	2 out of 3	109.818					17.482	0.0131	fold change	-1.97	92.3361	7.4e-05	fold change	24.3
RIPK4	54101	receptor-interacting serine-threonine kinase 4	2 out of 3	109.772					76.6237	0.0002	fold change	20.6	33.1479	0.0005	fold change	-2.37
ITGB6	3694	integrin, beta 6	2 out of 3	109.622					31.0385	0.0104	fold change	-3.1	78.583	0.0001	fold change	8.9
CACHD1	57685	cache domain containing 1	2 out of 3	109.575					71.498	0.0078	fold change	-15.7	38.0767	0.0024	fold change	-2.66
235299_at	NA		2 out of 3	109.562					91.2409	0.0002	fold change	75.2	18.321	0.0106	fold change	1.68
SH3YL1	26751	SH3 domain containing, Ysc84-like 1 (S. cerevisiae)	2 out of 3	109.383					18.8145	0.0013	fold change	2.08	90.5682	0.0015	fold change	20
SLC1A3	6507	solute carrier family 1 (glial high affinity glutamate transporter), member 3	2 out of 3	109.37					85.9446	0.0011	fold change	-41.3	23.4257	0.0015	fold change	1.91
PQLC3	130814	PQ loop repeat containing 3	2 out of 3	109.276					67.198	0.0042	fold change	12.6	42.0783	0.0008	fold change	2.91
ANXA3	306	annexin A3	2 out of 3	109.217	90.4339	0.0301	fold change	-1.42181					18.7829	0.0072	fold change	-1.7
ADM	133	adrenomedullin	2 out of 3	109.194					42.3977	0.0135	fold change	-4.47	66.7967	0.001	fold change	-5.81
PTGES	9536	prostaglandin E synthase	2 out of 3	109.135					45.2542	0.0014	fold change	-4.92	63.8806	0.0004	fold change	-5.25
KRT17	3872	keratin 17	2 out of 3	109.132					95.5676	9.3e-05	fold change	-135	13.564	0.0486	fold change	1.45
EPB41L5	57669	erythrocyte membrane protein band 4.1 like 5	2 out of 3	109.08					36.14	0.0007	fold change	3.61	22.4093	0.0005	fold change	-1.86
EMP3	2014	epithelial membrane protein 3	2 out of 3	109.028					19.97	0.0314	fold change	2.17	89.0583	0.0021	fold change	-16.7
MAOB	4129	monoamine oxidase B	2 out of 3	108.673					81.2308	0.001	fold change	28.9	27.4422	0.0315	fold change	2.09
GPR87	53836	G protein-coupled receptor 87	2 out of 3	108.667					92.5446	2.6e-05	fold change	-92.1	16.1222	0.0032	fold change	1.58
SLC16A5	9121	solute carrier family 16, member 5 (monocarboxylic acid transporter 6)	2 out of 3	108.578					34.5841	0.0337	fold change	3.45	73.9941	0.0004	fold change	7.59
MAN1A1	4121	mannosidase, alpha, class 1A, member 1	2 out of 3	108.481					68.1292	7.2e-05	fold change	13.2	40.3515	0.0352	fold change	-2.81
MLKL	197259	mixed lineage kinase domain-like	2 out of 3	108.382	91.8544	0.0411	fold change	1.46305	16.5276	0.0184	fold change	1.9
SPINT1	6692	serine peptidase inhibitor, Kunitz type 1	2 out of 3	108.38					22.012	0.0193	fold change	-2.32	86.3677	0.0012	fold change	14.3
FSCN1	6624	fascin homolog 1, actin-bundling protein (Strongylocentrotus purpuratus)	2 out of 3	108.164					13.7706	0.0337	fold change	-1.69	94.3931	7.1e-06	fold change	-32.6
PROM2	150696	prominin 2	2 out of 3	108.016					93.1064	3.7e-05	fold change	-97.2	14.9098	0.0173	fold change	1.52
PSMD9	5715	proteasome (prosome, macropain) 26S subunit, non-ATPase, 9	2 out of 3	107.991	95.8662	0.0084	fold change	-1.59517					12.1244	0.0131	fold change	-1.37
SOCS3	9021	suppressor of cytokine signaling 3	2 out of 3	107.916					28.3669	0.0005	fold change	-2.83	79.5494	8.6e-05	fold change	-9.42
ATP9B	374868	ATPase, class II, type 9B	2 out of 3	107.84					22.3726	0.0002	fold change	2.35	85.4672	5.1e-06	fold change	13.2
TNXA	7146	tenascin XA (pseudogene)	2 out of 3	107.496	97.2309	0.0339	fold change	1.68811	10.2653	0.0043	fold change	1.42
KYNU	8942	kynureninase	2 out of 3	107.379					92.2679	1.2e-06	fold change	-88.1	15.1114	0.0044	fold change	1.53
KLHL9	55958	kelch-like 9 (Drosophila)	2 out of 3	107.33					84.1213	0.0002	fold change	37.6	23.209	0.0049	fold change	-1.9
ZNF655	79027	zinc finger protein 655	2 out of 3	107.316					18.5785	0.0038	fold change	-2.06	88.7374	0.001	fold change	-16.3
IL1RN	3557	interleukin 1 receptor antagonist	2 out of 3	107.303					84.2943	0.0063	fold change	-37.7	23.009	0.0293	fold change	1.89
TMEM37	140738	transmembrane protein 37	2 out of 3	107.038					78.8855	0.002	fold change	23.7	28.1524	0.0064	fold change	2.13
ST6GALNAC1	55808	ST6 (alpha-N-acetyl-neuraminyl-2,3-beta-galactosyl-1,3)-N-acetylgalactosaminide alpha-2,6-sialyltransferase 1	2 out of 3	106.975					39.4073	0.0116	fold change	-4.01	67.5676	0.0009	fold change	5.97
BLNK	29760	B-cell linker	2 out of 3	106.825					45.1875	0.0001	fold change	-4.91	61.6378	0.0083	fold change	4.85
BMP4	652	bone morphogenetic protein 4	2 out of 3	106.743					71.0026	0.0204	fold change	15.4	35.7406	0.0056	fold change	2.53
GDAP1	54332	ganglioside induced differentiation associated protein 1	2 out of 3	106.737					49.2228	0.0304	fold change	-5.64	57.5142	0.0029	fold change	-4.3
MYO5C	55930	myosin VC	2 out of 3	106.728					58.4713	0.0035	fold change	-8.3	48.2565	0.0006	fold change	3.4
MUC17	140453	mucin 17, cell surface associated	2 out of 3	106.712					92.1982	0.0012	fold change	87.7	14.5137	0.0092	fold change	1.5
EID3	493861	EP300 interacting inhibitor of differentiation 3	2 out of 3	106.652					33.7116	0.0076	fold change	3.36	72.9405	2.6e-05	fold change	-7.34
PLEKHA6	22874	pleckstrin homology domain containing, family A member 6	2 out of 3	106.477					24.1576	0.0266	fold change	2.48	82.3194	8.9e-05	fold change	10.9
ERBB3	2065	v-erb-b2 erythroblastic leukemia viral oncogene homolog 3 (avian)	2 out of 3	106.312					16.6688	0.0227	fold change	1.91	89.6427	0.0025	fold change	17.8
CD81	975	CD81 molecule	2 out of 3	106.275					71.623	0.0095	fold change	15.8	34.6524	0.014	fold change	-2.46
FLNA	2316	filamin A, alpha	2 out of 3	105.828					48.3134	0.0021	fold change	-5.47	57.5142	0.005	fold change	-4.3
AK021807	NA		2 out of 3	105.755					64.9612	0.0066	fold change	-11.4	40.7937	0.0006	fold change	-2.83
PRSS8	5652	protease, serine, 8	2 out of 3	105.501					34.458	0.01	fold change	-3.44	71.0429	0.0005	fold change	6.8
NAMPT	10135	nicotinamide phosphoribosyltransferase	2 out of 3	105.469					51.4907	0.0097	fold change	-6.16	53.9782	0.0006	fold change	-3.92
MARK1	4139	MAP/microtubule affinity-regulating kinase 1	2 out of 3	105.457					68.6238	0.002	fold change	-13.6	36.833	0.0002	fold change	-2.59
SLC7A7	9056	solute carrier family 7 (amino acid transporter light chain, y+L system), member 7	2 out of 3	105.41					72.1272	0.002	fold change	16.2	33.2825	0.001	fold change	2.38
KLF5	688	Kruppel-like factor 5 (intestinal)	2 out of 3	105.397					11.0042	0.0392	fold change	-1.48	94.3931	0.0003	fold change	32.6
MARCKSL1	65108	MARCKS-like 1	2 out of 3	105.353					47.7318	0.0126	fold change	5.36	57.6216	4.5e-05	fold change	4.31
FMO5	2330	flavin containing monooxygenase 5	2 out of 3	105.328					73.9492	0.0015	fold change	17.7	31.3792	0.0028	fold change	2.27
ANO1	55107	anoctamin 1, calcium activated chloride channel	2 out of 3	105.071					9.87286	0.0342	fold change	-1.39	95.1982	9.8e-05	fold change	35.8
CYP1B1	1545	cytochrome P450, family 1, subfamily B, polypeptide 1	2 out of 3	104.979					61.7314	0.0364	fold change	-9.66	43.2477	0.0099	fold change	-2.99
IPMK	253430	inositol polyphosphate multikinase	2 out of 3	104.978	92.1285	0.0171	fold change	-1.46781	12.8493	0.0174	fold change	1.62
CDA	978	cytidine deaminase	2 out of 3	104.738					72.1699	0.006	fold change	16.3	32.5682	0.0007	fold change	2.34
CDH2	1000	cadherin 2, type 1, N-cadherin (neuronal)	2 out of 3	104.636					24.8814	0.008	fold change	-2.54	79.755	0.0002	fold change	-9.46
TSPAN4	7106	tetraspanin 4	2 out of 3	104.483					21.047	0.0493	fold change	2.25	83.4362	6.5e-05	fold change	-11.5
KLHL24	54800	kelch-like 24 (Drosophila)	2 out of 3	104.466	90.9025	0.0055	fold change	-1.43661					13.564	0.0176	fold change	-1.45
FAM171B	165215	family with sequence similarity 171, member B	2 out of 3	104.19					52.9779	0.0004	fold change	-6.49	51.2122	0.0025	fold change	-3.64
OSBPL1A	114876	oxysterol binding protein-like 1A	2 out of 3	104.141					52.3462	0.0008	fold change	6.33	51.7947	0.0014	fold change	3.69
U08032	NA		2 out of 3	104.059					37.3706	0.0008	fold change	3.78	66.688	0.0001	fold change	5.78
EFHD2	79180	EF-hand domain family, member D2	2 out of 3	104.037	94.0327	0.004	fold change	1.52207	10.0038	0.0339	fold change	-1.4
MBNL3	55796	muscleblind-like splicing regulator 3	2 out of 3	104.03					22.6906	0.0436	fold change	-2.37	81.3392	5.2e-05	fold change	10.2
PRR15	222171	proline rich 15	2 out of 3	103.906					21.1996	0.009	fold change	2.26	82.7061	0.0001	fold change	11.1
APOBEC1	339	apolipoprotein B mRNA editing enzyme, catalytic polypeptide 1	2 out of 3	103.901					57.3796	6.8e-05	fold change	7.86	46.5216	0.0028	fold change	3.27
MICB	4277	MHC class I polypeptide-related sequence B	2 out of 3	103.869					41.9203	0.016	fold change	-4.39	61.9487	0.0026	fold change	-4.91
ATP8B1	5205	ATPase, aminophospholipid transporter, class I, type 8B, member 1	2 out of 3	103.852					18.4447	0.0003	fold change	-2.05	85.4073	0.0006	fold change	13.1
MT1E	4493	metallothionein 1E	2 out of 3	103.773					29.5109	0.0048	fold change	-2.94	74.2622	2e-05	fold change	-7.65
GPRC5B	51704	G protein-coupled receptor, family C, group 5, member B	2 out of 3	103.702					70.5537	4.4e-05	fold change	-15	33.1479	0.0048	fold change	-2.37
238320_at	NA		2 out of 3	103.678	91.2409	0.0221	fold change	-1.45079	12.4372	0.0229	fold change	1.59
CXCL2	2920	chemokine (C-X-C motif) ligand 2	2 out of 3	103.616					18.4447	0.0252	fold change	-2.05	85.1716	0.0003	fold change	-12.8
PFN2	5217	profilin 2	2 out of 3	103.399					54.6257	0.0101	fold change	-6.9	48.7734	0.0003	fold change	-3.44
LAMA3	3909	laminin, alpha 3	2 out of 3	103.372					15.9589	0.0023	fold change	-1.86	87.4126	8.6e-06	fold change	15
MITF	4286	microphthalmia-associated transcription factor	2 out of 3	103.268					79.139	0.007	fold change	-23.9	24.1292	0.0133	fold change	-1.94
SLC15A1	6564	solute carrier family 15 (oligopeptide transporter), member 1	2 out of 3	103.251					84.468	0.0005	fold change	37.9	18.7829	0.0008	fold change	1.7
CXCL1	2919	chemokine (C-X-C motif) ligand 1 (melanoma growth stimulating activity, alpha)	2 out of 3	103.199					32.8468	0.0084	fold change	-3.28	70.3522	0.0028	fold change	-6.61
GPX8	493869	glutathione peroxidase 8 (putative)	2 out of 3	103.163					10.6183	0.0191	fold change	1.45	92.5446	1.2e-05	fold change	-25
SERPINB1	1992	serpin peptidase inhibitor, clade B (ovalbumin), member 1	2 out of 3	103.04					49.9022	7e-05	fold change	5.76	53.1378	8.8e-05	fold change	3.82
MUC1	4582	mucin 1, cell surface associated	2 out of 3	102.914					37.1897	0.0047	fold change	-3.75	65.7246	7.6e-06	fold change	5.58
225288_at	NA		2 out of 3	102.7					74.3075	0.0002	fold change	-18	28.393	0.0212	fold change	-2.14
TRIM16	10626	tripartite motif containing 16	2 out of 3	102.663					46.9479	0.0093	fold change	-5.22	55.7153	0.0011	fold change	-4.09
STON2	85439	stonin 2	2 out of 3	102.537					45.556	0.0023	fold change	-4.97	56.9807	0.0019	fold change	4.23
TPM2	7169	tropomyosin 2 (beta)	2 out of 3	102.478					57.4066	0.0046	fold change	7.87	45.0714	0.0007	fold change	-3.14
TMEM40	55287	transmembrane protein 40	2 out of 3	102.399					54.7963	0.0136	fold change	-6.94	47.6023	0.0005	fold change	-3.34
SLC44A3	126969	solute carrier family 44, member 3	2 out of 3	102.27					13.9156	0.0009	fold change	-1.7	88.3548	2.5e-05	fold change	15.8
ELL2	22936	elongation factor, RNA polymerase II, 2	2 out of 3	102.25					75.9129	0.011	fold change	-19.6	26.3369	0.0156	fold change	-2.04
PLA2G16	11145	phospholipase A2, group XVI	2 out of 3	102.229					66.1848	0.0009	fold change	12	36.0446	0.0023	fold change	2.55
227193_at	NA		2 out of 3	102.153					57.8932	0.0011	fold change	-8.07	44.2599	0.0044	fold change	-3.07
SPINK5	11005	serine peptidase inhibitor, Kazal type 5	2 out of 3	102.01					76.7189	0.0007	fold change	-20.7	25.291	0.0069	fold change	1.99
KIAA0040	9674	KIAA0040	2 out of 3	101.789					65.585	0.0001	fold change	11.7	36.2038	0.0027	fold change	2.56
JUN	3725	jun proto-oncogene	2 out of 3	101.596					28.7853	0.001	fold change	-2.87	72.8109	0.0001	fold change	-7.27
CACNA1D	776	calcium channel, voltage-dependent, L type, alpha 1D subunit	2 out of 3	101.587					27.8589	0.0404	fold change	-2.79	73.7278	0.0022	fold change	7.53
AIF1L	83543	allograft inflammatory factor 1-like	2 out of 3	101.512					58.6112	0.0011	fold change	-8.34	42.9008	0.0007	fold change	2.97
ATP8B3	148229	ATPase, aminophospholipid transporter, class I, type 8B, member 3	2 out of 3	101.39					56.9541	0.0156	fold change	7.71	44.4361	0.0003	fold change	-3.08
BF055200	NA		2 out of 3	101.353					53.3225	0.0007	fold change	6.56	48.0303	0.0002	fold change	3.38
IFI44L	10964	interferon-induced protein 44-like	2 out of 3	101.247					55.8928	0.0497	fold change	-7.3	45.3544	0.0405	fold change	-3.17
PAPLN	89932	papilin, proteoglycan-like sulfated glycoprotein	2 out of 3	100.825	91.6489	0.0321	fold change	1.4582	9.17568	0.0104	fold change	1.33
HIPK2	28996	homeodomain interacting protein kinase 2	2 out of 3	100.683					12.7072	0.0152	fold change	1.61	87.9755	0.0001	fold change	-15.5
CBLC	23624	Cbl proto-oncogene, E3 ubiquitin protein ligase C	2 out of 3	100.659					29.9423	0.0006	fold change	-2.98	70.7164	0.0023	fold change	6.69
RHOBTB1	9886	Rho-related BTB domain containing 1	2 out of 3	100.539					48.8315	0.0012	fold change	-5.57	51.7074	0.005	fold change	3.68
LOC100506119	100506119	uncharacterized LOC100506119	2 out of 3	100.37					72.7241	0.0012	fold change	-16.7	27.6458	0.002	fold change	-2.1
ITGB8	3696	integrin, beta 8	2 out of 3	100.271					18.007	0.0317	fold change	2.01	82.2639	0.0007	fold change	10.8
HOXB2	3212	homeobox B2	2 out of 3	100.215					59.6637	0.0092	fold change	8.72	40.5512	0.0094	fold change	-2.82
PI3	5266	peptidase inhibitor 3, skin-derived	2 out of 3	100.164					22.5242	0.0307	fold change	-2.36	77.6398	0.0009	fold change	8.57
KIAA1211	57482	KIAA1211	2 out of 3	100.148					70.7574	0.003	fold change	15.2	29.391	0.0065	fold change	-2.18
KCNK1	3775	potassium channel, subfamily K, member 1	2 out of 3	100.026					48.5998	0.0019	fold change	5.52	51.426	0.0006	fold change	3.66
SYTL5	94122	synaptotagmin-like 5	2 out of 3	99.9518					33.3367	0.0025	fold change	3.33	66.6152	0.0181	fold change	5.77
GULP1	51454	GULP, engulfment adaptor PTB domain containing 1	2 out of 3	99.8448					59.8086	0.0017	fold change	8.77	40.0362	0.0077	fold change	-2.79
AFAP1L2	84632	actin filament associated protein 1-like 2	2 out of 3	99.6637					77.4929	4.3e-06	fold change	-21.8	22.1708	0.0107	fold change	-1.85
TRPM6	140803	transient receptor potential cation channel, subfamily M, member 6	2 out of 3	99.6312					73.9492	0.0163	fold change	17.7	25.682	0.0032	fold change	2.01
C2orf88	84281	chromosome 2 open reading frame 88	2 out of 3	99.5424					86.7333	0.0005	fold change	44.5	12.8091	0.0438	fold change	1.41
PPM1K	152926	protein phosphatase, Mg2+/Mn2+ dependent, 1K	2 out of 3	99.4846					30.937	0.0121	fold change	-3.09	68.5476	0.0002	fold change	-6.12
PCLO	27445	piccolo (presynaptic cytomatrix protein)	2 out of 3	99.4507					61.515	0.0008	fold change	-9.56	37.9357	0.0061	fold change	-2.65
242881_x_at	NA		2 out of 3	99.4496					81.7715	0.0002	fold change	-29.7	17.6781	0.001	fold change	-1.65
PLSCR4	57088	phospholipid scramblase 4	2 out of 3	99.4401					58.3328	0.0073	fold change	8.24	41.1073	0.0024	fold change	2.85
ACSL1	2180	acyl-CoA synthetase long-chain family member 1	2 out of 3	99.3967					77.4437	0.0211	fold change	-21.7	21.9529	0.0103	fold change	-1.84
CTGF	1490	connective tissue growth factor	2 out of 3	99.3728					50.8306	0.0107	fold change	6	48.5423	0.0008	fold change	-3.42
RAMP1	10267	receptor (G protein-coupled) activity modifying protein 1	2 out of 3	99.3675					68.6238	0.0092	fold change	13.6	30.7437	0.0006	fold change	2.24
ANPEP	290	alanyl (membrane) aminopeptidase	2 out of 3	99.3594					75.7266	0.0036	fold change	19.5	23.6328	0.0098	fold change	-1.92
RASEF	158158	RAS and EF-hand domain containing	2 out of 3	99.269					34.1707	0.0179	fold change	-3.41	65.0982	0.0021	fold change	5.49
RAI14	26064	retinoic acid induced 14	2 out of 3	99.0929					51.4907	0.0255	fold change	-6.16	47.6023	0.0004	fold change	-3.34
AI978754	NA		2 out of 3	98.9779					20.4961	0.0115	fold change	2.21	78.4818	0.0003	fold change	8.83
ACP1	52	acid phosphatase 1, soluble	2 out of 3	98.8129					66.3993	0.0009	fold change	12.1	32.4137	0.0015	fold change	2.33
NLRP2	55655	NLR family, pyrin domain containing 2	2 out of 3	98.5498					67.605	3.1e-05	fold change	-12.9	30.9448	0.0008	fold change	2.25
PADI3	51702	peptidyl arginine deiminase, type III	2 out of 3	98.4327					86.795	1.5e-05	fold change	-44.6	11.6377	0.0359	fold change	-1.34
ALPP	250	alkaline phosphatase, placental	2 out of 3	98.4207					53.4154	0.0038	fold change	6.57	45.0053	0.0053	fold change	3.13
DMD	1756	dystrophin	2 out of 3	98.3784					42.4856	0.0004	fold change	-4.48	55.8928	0.0248	fold change	-4.12
ZNF503	84858	zinc finger protein 503	2 out of 3	98.1432					77.688	0.0009	fold change	-22	20.4552	0.0164	fold change	-1.78
ERVMER34-1	100288413	endogenous retrovirus group MER34, member 1	2 out of 3	98.1424					56.2506	0.002	fold change	-7.49	41.8918	0.0145	fold change	2.9
BMPR1B	658	bone morphogenetic protein receptor, type IB	2 out of 3	98.1123					81.9901	0.0002	fold change	-30.1	16.1222	0.0258	fold change	1.58
ANXA4	307	annexin A4	2 out of 3	98.1027					32.2013	0.0003	fold change	3.21	65.9013	5.5e-05	fold change	5.61
AU157716	NA		2 out of 3	98.0614					53.4154	0.0489	fold change	-6.57	44.646	0.0207	fold change	-3.1
CYP26B1	56603	cytochrome P450, family 26, subfamily B, polypeptide 1	2 out of 3	97.9832					52.9779	0.0006	fold change	-6.49	45.0053	0.0074	fold change	-3.13
236129_at	NA		2 out of 3	97.9612					31.5972	0.0006	fold change	3.15	66.364	0.002	fold change	5.73
RBM47	54502	RNA binding motif protein 47	2 out of 3	97.8939					15.9589	0.0498	fold change	1.86	81.935	0.0019	fold change	10.6
ABCC6	368	ATP-binding cassette, sub-family C (CFTR/MRP), member 6	2 out of 3	97.74					61.3001	0.0005	fold change	9.38	36.44	0.0063	fold change	2.57
SNRPN	6638	small nuclear ribonucleoprotein polypeptide N	2 out of 3	97.7306					49.7003	0.0071	fold change	-5.72	48.0303	0.0026	fold change	3.38
NFIA	4774	nuclear factor I/A	2 out of 3	97.5506					27.7582	0.0116	fold change	-2.78	69.7924	0.0012	fold change	6.48
DRAM1	55332	DNA-damage regulated autophagy modulator 1	2 out of 3	97.5505					43.4771	0.0073	fold change	-4.66	54.0733	0.0025	fold change	-3.93
RNLS	55328	renalase, FAD-dependent amine oxidase	2 out of 3	97.5301					64.2475	0.0005	fold change	-10.9	33.2825	0.0001	fold change	2.38
AV735587	NA		2 out of 3	97.4629					46.7159	0.0076	fold change	-5.16	50.747	0.0032	fold change	3.59
SHOX2	6474	short stature homeobox 2	2 out of 3	97.3202					33.2734	0.0044	fold change	-3.32	64.0467	0.0009	fold change	-5.3
216336_x_at	NA		2 out of 3	97.2709					24.1576	0.0184	fold change	-2.48	73.1133	6.2e-05	fold change	-7.39
ARRB1	408	arrestin, beta 1	2 out of 3	97.2568					70.92	0.001	fold change	15.3	26.3369	0.0049	fold change	2.04
KIAA0485	57235	uncharacterized LOC57235	2 out of 3	97.2275					37.1559	0.0257	fold change	-3.74	60.0716	0.0002	fold change	4.66
C12orf75	387882	chromosome 12 open reading frame 75	2 out of 3	97.2098					79.2921	0.0055	fold change	24.1	17.9177	0.0055	fold change	1.66
226164_x_at	NA		2 out of 3	97.0715					61.3309	0.0088	fold change	-9.4	35.7406	0.0069	fold change	-2.53
PGM2L1	283209	phosphoglucomutase 2-like 1	2 out of 3	97.0258					40.9293	0.0024	fold change	-4.23	56.0966	3.5e-05	fold change	-4.14
LOC374443	374443	C-type lectin domain family 2, member D pseudogene	2 out of 3	96.9652					76.7189	1.1e-06	fold change	-20.7	20.2463	0.0018	fold change	-1.77
PROS1	5627	protein S (alpha)	2 out of 3	96.8795					78.3318	0.0001	fold change	23	18.5476	0.022	fold change	1.69
TMEM139	135932	transmembrane protein 139	2 out of 3	96.6864					34.1707	0.0238	fold change	3.41	62.5156	0.0008	fold change	5.05
AKR1C3	8644	aldo-keto reductase family 1, member C3 (3-alpha hydroxysteroid dehydrogenase, type II)	2 out of 3	96.4922					19.4363	0.0002	fold change	2.13	77.0559	1.6e-05	fold change	8.35
MEIS3P1	4213	Meis homeobox 3 pseudogene 1	2 out of 3	96.4135					28.0945	0.0002	fold change	-2.81	68.3191	0.0008	fold change	-6.09
DUSP5	1847	dual specificity phosphatase 5	2 out of 3	96.3727					67.198	6.8e-05	fold change	-12.6	29.1748	0.0038	fold change	-2.17
NBEA	26960	neurobeachin	2 out of 3	96.3679					59.7215	0.0003	fold change	-8.74	36.6464	0.0051	fold change	-2.58
HMGCS1	3157	3-hydroxy-3-methylglutaryl-CoA synthase 1 (soluble)	2 out of 3	96.3339					71.0429	0.0027	fold change	-15.5	25.291	0.0007	fold change	-1.99
DUXAP10	503639	double homeobox A pseudogene 10	2 out of 3	96.2612					56.5355	0.007	fold change	-7.6	39.7257	0.0201	fold change	-2.77
BE672045	NA		2 out of 3	96.1347					43.2934	0.0082	fold change	-4.63	52.8413	0.0132	fold change	-3.79
SULT1A2	6799	sulfotransferase family, cytosolic, 1A, phenol-preferring, member 2	2 out of 3	95.9411					37.0774	0.0006	fold change	3.73	58.8637	0.0007	fold change	4.49
MCTP2	55784	multiple C2 domains, transmembrane 2	2 out of 3	95.8851					60.5451	0.0002	fold change	-9.06	35.3399	0.0011	fold change	2.51
ADARB1	104	adenosine deaminase, RNA-specific, B1	2 out of 3	95.862					52.8413	0.001	fold change	-6.43	43.0207	0.0033	fold change	-2.98
KITLG	4254	KIT ligand	2 out of 3	95.7646					15.4884	0.0096	fold change	1.82	80.2761	0.0001	fold change	9.67
AU148154	NA		2 out of 3	95.7412					55.1901	0.0115	fold change	-7.04	40.5512	0.0065	fold change	2.82
212414_s_at	NA		2 out of 3	95.7292					32.2774	0.0093	fold change	3.22	63.4518	0.0023	fold change	-5.19
PPFIBP2	8495	PTPRF interacting protein, binding protein 2 (liprin beta 2)	2 out of 3	95.7222					56.3025	0.0034	fold change	7.5	39.4197	0.0032	fold change	2.75
ANTXR2	118429	anthrax toxin receptor 2	2 out of 3	95.6749					34.7996	0.0147	fold change	3.47	60.8754	0.0016	fold change	4.75
FABP1	2168	fatty acid binding protein 1, liver	2 out of 3	95.5856					9.3995	0.043	fold change	1.35	86.1861	0.0006	fold change	13.9
LIMA1	51474	LIM domain and actin binding 1	2 out of 3	95.5543					16.6688	0.0012	fold change	1.91	78.8855	0.0018	fold change	9.05
SLC35E4	339665	solute carrier family 35, member E4	2 out of 3	95.4732					59.0333	0.0141	fold change	8.54	36.44	0.0444	fold change	-2.57
DNAJB4	11080	DnaJ (Hsp40) homolog, subfamily B, member 4	2 out of 3	95.4326					39.1561	0.0038	fold change	-3.99	56.2765	0.0021	fold change	-4.15
USP47	55031	ubiquitin specific peptidase 47	2 out of 3	95.429					83.949	3.9e-06	fold change	36.3	11.4801	0.0248	fold change	-1.33
SLC41A2	84102	solute carrier family 41, member 2	2 out of 3	95.4263					80.1192	0.0013	fold change	26.1	15.3071	0.0329	fold change	1.54
C21orf91	54149	chromosome 21 open reading frame 91	2 out of 3	95.4194					54.6257	0.0003	fold change	-6.9	40.7937	0.0087	fold change	-2.83
LGALS3	3958	lectin, galactoside-binding, soluble, 3	2 out of 3	95.4185					20.3401	0.0016	fold change	2.2	75.0785	9.6e-05	fold change	7.81
EXT1	2131	exostosin 1	2 out of 3	95.4073					26.5529	0.0327	fold change	-2.67	68.8544	0.0003	fold change	-6.25
DPYD	1806	dihydropyrimidine dehydrogenase	2 out of 3	95.4026					9.75688	0.0353	fold change	1.38	85.6458	0.0023	fold change	-13.3
AK4	205	adenylate kinase 4	2 out of 3	95.3916					14.0524	0.0437	fold change	-1.71	81.3392	4.7e-05	fold change	-10.2
HES1	3280	hairy and enhancer of split 1, (Drosophila)	2 out of 3	95.3877					36.9437	0.0003	fold change	-3.71	58.444	0.0031	fold change	4.42
PAPSS2	9060	3'-phosphoadenosine 5'-phosphosulfate synthase 2	2 out of 3	95.3616					50.2902	0.0306	fold change	5.82	45.0714	0.0038	fold change	3.14
FAM108C1	58489	family with sequence similarity 108, member C1	2 out of 3	95.3356					23.4614	0.0005	fold change	-2.43	71.8742	0.0035	fold change	7.07
CPPED1	55313	calcineurin-like phosphoesterase domain containing 1	2 out of 3	95.2317					79.755	0.0004	fold change	25.1	15.4767	0.0127	fold change	1.55
FLJ39632	642477	uncharacterized LOC642477	2 out of 3	95.1386					65.585	0.0001	fold change	-11.7	29.5536	0.0259	fold change	-2.19
PTRF	284119	polymerase I and transcript release factor	2 out of 3	95.083					27.2174	0.0078	fold change	-2.73	67.8656	0.0013	fold change	-6.02
MAF	4094	v-maf musculoaponeurotic fibrosarcoma oncogene homolog (avian)	2 out of 3	95.0547					73.551	0.001	fold change	-17.3	21.5036	0.0062	fold change	-1.82
DEPTOR	64798	DEP domain containing MTOR-interacting protein	2 out of 3	95.0012					73.7724	0.0034	fold change	17.6	21.2288	0.0036	fold change	1.81
TRIM29	23650	tripartite motif containing 29	2 out of 3	94.9636					82.1544	5.7e-06	fold change	-30.3	12.8091	0.046	fold change	1.41
AA045174	NA		2 out of 3	94.8758					46.1025	0.0094	fold change	5.06	48.7734	0.0015	fold change	-3.44
PRKACB	5567	protein kinase, cAMP-dependent, catalytic, beta	2 out of 3	94.8241					31.8922	0.0152	fold change	3.18	62.9319	0.0147	fold change	-5.11
KLHL29	114818	kelch-like 29 (Drosophila)	2 out of 3	94.7878					55.1901	0.0032	fold change	-7.04	39.5977	0.0096	fold change	-2.76
ANKH	56172	ankylosis, progressive homolog (mouse)	2 out of 3	94.7109					54.6747	0.0046	fold change	-6.91	40.0362	0.0007	fold change	2.79
RNASE4	6038	ribonuclease, RNase A family, 4	2 out of 3	94.5878					52.014	0.0007	fold change	6.26	42.5738	0.0026	fold change	2.94
NR4A2	4929	nuclear receptor subfamily 4, group A, member 2	2 out of 3	94.5515					64.2475	0.0194	fold change	10.9	30.3039	0.0005	fold change	2.22
C4BPB	725	complement component 4 binding protein, beta	2 out of 3	94.5104					82.5396	0.0002	fold change	30.8	11.9709	0.0049	fold change	1.36
HNF4A	3172	hepatocyte nuclear factor 4, alpha	2 out of 3	94.4034					46.9479	0.0032	fold change	5.22	47.4554	0.0037	fold change	3.33
LY6K	54742	lymphocyte antigen 6 complex, locus K	2 out of 3	94.3638					64.3484	9.6e-05	fold change	-11	30.0154	0.0018	fold change	-2.21
PHLPP1	23239	PH domain and leucine rich repeat protein phosphatase 1	2 out of 3	94.2532					57.0073	0.0064	fold change	-7.72	37.2459	0.0026	fold change	2.61
AMOTL1	154810	angiomotin like 1	2 out of 3	94.185					36.1823	0.0021	fold change	-3.62	58.0026	0.0016	fold change	-4.38
SLC16A7	9194	solute carrier family 16, member 7 (monocarboxylic acid transporter 2)	2 out of 3	93.9883					11.3928	0.0068	fold change	-1.51	82.5955	1.9e-05	fold change	-11
214307_at	NA		2 out of 3	93.8704					49.9426	0.0298	fold change	5.77	43.9279	0.0002	fold change	3.05
TNC	3371	tenascin C	2 out of 3	93.8504					69.0093	0.0002	fold change	13.9	24.8411	0.0078	fold change	-1.97
MT1F	4494	metallothionein 1F	2 out of 3	93.8264					28.9343	0.0125	fold change	-2.88	64.8921	1.4e-05	fold change	-5.44
VEGFA	7422	vascular endothelial growth factor A	2 out of 3	93.6761					41.5521	0.0064	fold change	-4.34	52.1241	8.5e-05	fold change	-3.74
ZNF420	147923	zinc finger protein 420	2 out of 3	93.6677					48.3134	0.0005	fold change	-5.47	45.3544	0.0033	fold change	-3.17
BAG3	9531	BCL2-associated athanogene 3	2 out of 3	93.509					30.7052	2.7e-05	fold change	-3.07	62.8038	0.0008	fold change	-5.1
BHLHE41	79365	basic helix-loop-helix family, member e41	2 out of 3	93.3232					77.201	0.0003	fold change	-21.2	16.1222	0.026	fold change	1.58
GAL3ST1	9514	galactose-3-O-sulfotransferase 1	2 out of 3	93.3085					53.1152	8.9e-05	fold change	6.53	40.1932	0.0079	fold change	2.8
PCSK5	5125	proprotein convertase subtilisin/kexin type 5	2 out of 3	93.2635					47.0916	0.0005	fold change	5.25	46.1719	0.0031	fold change	3.24
TP63	8626	tumor protein p63	2 out of 3	93.206					83.3236	9.4e-06	fold change	-33.1	9.8824	0.0295	fold change	-1.2
MTAP	4507	methylthioadenosine phosphorylase	2 out of 3	93.1781					77.0559	0.0004	fold change	21.1	16.1222	0.0219	fold change	-1.58
SMAD6	4091	SMAD family member 6	2 out of 3	93.1011					19.0183	0.0284	fold change	2.1	74.0829	0.0001	fold change	7.61
SLCO4A1	28231	solute carrier organic anion transporter family, member 4A1	2 out of 3	92.9511					75.0334	6.1e-05	fold change	18.8	17.9177	0.0229	fold change	-1.66
ELF3	1999	E74-like factor 3 (ets domain transcription factor, epithelial-specific )	2 out of 3	92.9136					20.6164	0.0262	fold change	2.22	72.2972	1.3e-05	fold change	7.18
EMP2	2013	epithelial membrane protein 2	2 out of 3	92.8614					58.0026	0.0003	fold change	-8.09	34.8588	0.0004	fold change	2.48
MBNL1	4154	muscleblind-like splicing regulator 1	2 out of 3	92.7546					55.017	0.0321	fold change	-6.99	37.7376	0.0138	fold change	2.64
ADAM28	10863	ADAM metallopeptidase domain 28	2 out of 3	92.701					20.6164	0.0049	fold change	-2.22	72.0845	0.0001	fold change	7.14
GATA3	2625	GATA binding protein 3	2 out of 3	92.6755					74.1279	0.0029	fold change	-17.8	18.5476	0.0347	fold change	1.69
AW452823	NA		2 out of 3	92.662					42.8409	0.0393	fold change	-4.56	49.8211	0.0128	fold change	3.53
DNAJC6	9829	DnaJ (Hsp40) homolog, subfamily C, member 6	2 out of 3	92.5838					31.0385	0.0145	fold change	3.1	61.5453	0.0003	fold change	-4.83
F12	2161	coagulation factor XII (Hageman factor)	2 out of 3	92.5153					32.0002	0.0012	fold change	3.19	60.5151	0.0006	fold change	4.72
DLL1	28514	delta-like 1 (Drosophila)	2 out of 3	92.5109					66.5797	0.0009	fold change	-12.2	25.9312	0.0038	fold change	-2.02
FAM129A	116496	family with sequence similarity 129, member A	2 out of 3	92.4593					26.416	8.8e-05	fold change	-2.66	66.0432	0.0023	fold change	-5.63
C11orf9	745	chromosome 11 open reading frame 9	2 out of 3	92.4428					29.5109	0.0161	fold change	2.94	62.9319	0.0003	fold change	5.11
XAF1	54739	XIAP associated factor 1	2 out of 3	92.4184					67.3083	0.0014	fold change	-12.7	25.1101	0.0148	fold change	-1.98
PHLDA1	22822	pleckstrin homology-like domain, family A, member 1	2 out of 3	92.3558					15.5886	0.0459	fold change	1.83	76.7672	0.0003	fold change	-8.3
PDZK1	5174	PDZ domain containing 1	2 out of 3	92.2228					9.51667	0.0224	fold change	1.36	82.7061	0.0012	fold change	11.1
CD302	9936	CD302 molecule	2 out of 3	92.1488					70.92	8.9e-05	fold change	-15.3	21.2288	0.0093	fold change	-1.81
RABGAP1L	9910	RAB GTPase activating protein 1-like	2 out of 3	92.1066					51.5554	0.0241	fold change	6.18	40.5512	0.0021	fold change	2.82
DKK3	27122	dickkopf 3 homolog (Xenopus laevis)	2 out of 3	91.9622					14.7135	0.0043	fold change	1.76	77.2487	0.0001	fold change	-8.42
BCHE	590	butyrylcholinesterase	2 out of 3	91.9205					51.1268	0.01	fold change	-6.07	40.7937	6.4e-05	fold change	-2.83
NKX3-1	4824	NK3 homeobox 1	2 out of 3	91.8157					56.5873	0.0063	fold change	-7.61	35.2284	0.0041	fold change	-2.5
213107_at	NA		2 out of 3	91.7981					25.1101	0.0017	fold change	2.56	66.688	5.1e-05	fold change	5.78
MT1H	4496	metallothionein 1H	2 out of 3	91.7766					23.1914	0.0137	fold change	-2.41	68.5852	0.0001	fold change	-6.13
AK7	122481	adenylate kinase 7	2 out of 3	91.6598					52.8865	0.0014	fold change	6.47	38.7732	0.0039	fold change	2.71
FAM155A	728215	family with sequence similarity 155, member A	2 out of 3	91.6461					59.4615	0.0236	fold change	8.69	32.1846	0.0017	fold change	-2.32
FAM20C	56975	family with sequence similarity 20, member C	2 out of 3	91.3663					62.4524	5.2e-05	fold change	10	28.9139	0.0047	fold change	-2.16
OAT	4942	ornithine aminotransferase	2 out of 3	91.3529					50.5592	0.0003	fold change	-5.92	40.7937	0.0016	fold change	-2.83
BC042959	NA		2 out of 3	91.3237					43.2934	0.0011	fold change	-4.63	48.0303	0.0273	fold change	-3.38
LPXN	9404	leupaxin	2 out of 3	91.3232					77.935	0.0014	fold change	-22.7	13.3881	0.0483	fold change	1.44
SLC22A18	5002	solute carrier family 22, member 18	2 out of 3	91.3195					24.1576	0.0003	fold change	2.48	67.1619	0.0011	fold change	5.87
ANKRD6	22881	ankyrin repeat domain 6	2 out of 3	91.2457					28.217	0.0197	fold change	-2.82	63.0287	0.0059	fold change	-5.12
CYSTM1	84418	cysteine-rich transmembrane module containing 1	2 out of 3	91.2455					23.1914	0.0016	fold change	2.41	68.0541	3.6e-05	fold change	6.04
OCLN	100506658	occludin	2 out of 3	91.1898					41.7495	0.0064	fold change	4.36	49.4403	0.0012	fold change	3.5
AI224578	NA		2 out of 3	91.1679					65.2367	0.0007	fold change	-11.5	25.9312	0.0203	fold change	2.02
PSD3	23362	pleckstrin and Sec7 domain containing 3	2 out of 3	91.0706					63.2559	0.0071	fold change	10.4	27.8147	0.0026	fold change	2.11
MICALL1	85377	MICAL-like 1	2 out of 3	90.993					61.2392	1.6e-05	fold change	-9.32	29.7538	0.0059	fold change	-2.2
211458_s_at	NA		2 out of 3	90.8733					21.1996	0.0357	fold change	-2.26	69.6738	0.0002	fold change	-6.46
Hs.657591	NA		2 out of 3	90.8376					25.2183	0.0192	fold change	-2.57	65.6194	0.0007	fold change	-5.57
ZNF697	90874	zinc finger protein 697	2 out of 3	90.8308					67.198	4.9e-06	fold change	-12.6	23.6328	0.0033	fold change	-1.92
ZNF567	163081	zinc finger protein 567	2 out of 3	90.7956					52.4576	0.011	fold change	-6.36	38.338	0.0188	fold change	-2.68
DAPP1	27071	dual adaptor of phosphotyrosine and 3-phosphoinositides	2 out of 3	90.6186					72.9405	0.0012	fold change	-16.8	17.6781	0.009	fold change	1.65
Hs.672300	NA		2 out of 3	90.5957					35.8971	0.0412	fold change	-3.59	54.6986	0.0013	fold change	3.99
GEM	2669	GTP binding protein overexpressed in skeletal muscle	2 out of 3	90.5768					68.6238	0.0008	fold change	13.6	21.9529	0.0018	fold change	1.84
SVIL	6840	supervillin	2 out of 3	90.4559					30.03	0.0363	fold change	2.99	60.4259	0.0002	fold change	-4.71
MOXD1	26002	monooxygenase, DBH-like 1	2 out of 3	90.4495					24.1576	0.0123	fold change	2.48	66.2919	0.0039	fold change	5.68
LPAR5	57121	lysophosphatidic acid receptor 5	2 out of 3	90.4471					31.8922	0.0015	fold change	-3.18	58.5549	0.003	fold change	4.45
SULF2	55959	sulfatase 2	2 out of 3	90.2653					30.5146	0.0059	fold change	3.05	59.7507	0.0013	fold change	4.61
DHRS2	10202	dehydrogenase/reductase (SDR family) member 2	2 out of 3	90.173					54.4324	0.0415	fold change	-6.84	35.7406	0.0053	fold change	2.53
BCL11A	53335	B-cell CLL/lymphoma 11A (zinc finger protein)	2 out of 3	89.9419					40.1407	0.0001	fold change	-4.1	49.8013	0.0006	fold change	-3.52
FAM120C	54954	family with sequence similarity 120C	2 out of 3	89.718					33.1569	0.003	fold change	-3.31	56.5611	0.0007	fold change	-4.17
LYPD6B	130576	LY6/PLAUR domain containing 6B	2 out of 3	89.6949					36.14	0.0006	fold change	-3.61	53.555	0.0001	fold change	-3.88
MT1P2	645745	metallothionein 1 pseudogene 2	2 out of 3	89.6809					22.3726	0.0338	fold change	-2.35	67.3083	4.6e-05	fold change	-5.91
COCH	1690	coagulation factor C homolog, cochlin (Limulus polyphemus)	2 out of 3	89.6362					23.0566	0.0373	fold change	-2.4	66.5797	0.0012	fold change	-5.76
C10orf116	10974	chromosome 10 open reading frame 116	2 out of 3	89.6243					52.9779	0.0028	fold change	-6.49	36.6464	0.0059	fold change	2.58
BDNF	627	brain-derived neurotrophic factor	2 out of 3	89.4729					23.2881	0.0065	fold change	2.42	66.1848	0.0018	fold change	-5.64
HLA-DMA	3108	major histocompatibility complex, class II, DM alpha	2 out of 3	89.2903					69.8724	0.0001	fold change	14.6	19.4179	0.0196	fold change	1.73
CRLF3	51379	cytokine receptor-like factor 3	2 out of 3	89.0919					47.2001	0.0128	fold change	-5.27	41.8918	0.0026	fold change	2.9
TFF2	7032	trefoil factor 2	2 out of 3	89.0751					35.1679	0.0117	fold change	3.51	53.9072	0.0011	fold change	3.91
L25275	NA		2 out of 3	88.9573					29.2651	0.0013	fold change	2.92	59.6922	0.0028	fold change	4.6
SPICE1	152185	spindle and centriole associated protein 1	2 out of 3	88.8905					34.458	0.0274	fold change	-3.44	54.4324	0.001	fold change	3.97
FAM169A	26049	family with sequence similarity 169, member A	2 out of 3	88.8581					73.551	1.3e-05	fold change	-17.3	15.3071	0.0312	fold change	-1.54
BE048919	NA		2 out of 3	88.8507					64.7216	0.0049	fold change	11.2	24.1292	0.0067	fold change	1.94
ZNF329	79673	zinc finger protein 329	2 out of 3	88.7502					60.9355	0.0009	fold change	-9.18	27.8147	0.0285	fold change	-2.11
PAQR5	54852	progestin and adipoQ receptor family member V	2 out of 3	88.703					35.3804	0.0099	fold change	3.53	53.3225	0.0077	fold change	-3.83
SLPI	6590	secretory leukocyte peptidase inhibitor	2 out of 3	88.5016					26.5529	0.0009	fold change	-2.67	61.9487	0.0004	fold change	4.91
LONRF2	164832	LON peptidase N-terminal domain and ring finger 2	2 out of 3	88.4909					59.577	0.0031	fold change	8.7	28.9139	0.0112	fold change	-2.16
MECOM	2122	MDS1 and EVI1 complex locus	2 out of 3	88.4145					47.6209	0.0005	fold change	-5.34	40.7937	0.0048	fold change	2.83
TST	7263	thiosulfate sulfurtransferase (rhodanese)	2 out of 3	88.3949					24.5143	0.0047	fold change	2.51	63.8806	0.0002	fold change	5.25
SOAT1	6646	sterol O-acyltransferase 1	2 out of 3	88.3781					37.8189	0.022	fold change	-3.83	50.5592	0.0024	fold change	-3.57
FYN	2534	FYN oncogene related to SRC, FGR, YES	2 out of 3	88.2602					33.4638	0.0015	fold change	-3.34	54.7963	0.005	fold change	-4
ZNF260	339324	zinc finger protein 260	2 out of 3	88.2299					48.5041	0.0126	fold change	-5.51	39.7257	0.0104	fold change	-2.77
230961_at	NA		2 out of 3	88.1714					63.0612	0.0086	fold change	-10.3	25.1101	0.0342	fold change	1.98
C17orf110	100130933	chromosome 17 open reading frame 110	2 out of 3	88.1154					57.8115	0.0024	fold change	8.05	30.3039	0.005	fold change	2.22
SLC25A37	51312	solute carrier family 25 (mitochondrial iron transporter), member 37	2 out of 3	88.0328					13.7706	0.0066	fold change	-1.69	74.2622	0.0005	fold change	-7.65
ERO1LB	56605	ERO1-like beta (S. cerevisiae)	2 out of 3	88.0071					39.1561	0.007	fold change	-3.99	48.851	0.0007	fold change	-3.45
TP53INP1	94241	tumor protein p53 inducible nuclear protein 1	2 out of 3	87.9212					49.282	0.0107	fold change	-5.65	38.6393	0.0056	fold change	-2.7
USP22	23326	ubiquitin specific peptidase 22	2 out of 3	87.8775					11.5393	0.0216	fold change	-1.52	76.3382	0.0005	fold change	-8.09
ESRP2	80004	epithelial splicing regulatory protein 2	2 out of 3	87.8614					37.5302	0.0006	fold change	-3.79	50.3312	0.0243	fold change	3.55
DYNC2H1	79659	dynein, cytoplasmic 2, heavy chain 1	2 out of 3	87.7856					37.6798	0.0039	fold change	-3.81	50.1057	0.0071	fold change	-3.54
LIPH	200879	lipase, member H	2 out of 3	87.6326					35.0177	0.0067	fold change	3.49	52.615	0.0131	fold change	3.78
FRAS1	80144	Fraser syndrome 1	2 out of 3	87.5983					41.2174	0.0094	fold change	-4.28	46.3809	0.0044	fold change	3.26
NUP62CL	54830	nucleoporin 62kDa C-terminal like	2 out of 3	87.5715					18.7171	0.005	fold change	2.07	68.8544	0.0006	fold change	6.25
CHN2	1124	chimerin (chimaerin) 2	2 out of 3	87.5561					57.5407	0.0162	fold change	7.9	30.0154	0.001	fold change	2.21
ZNF529	57711	zinc finger protein 529	2 out of 3	87.4478					47.2545	0.0097	fold change	-5.28	40.1932	0.0009	fold change	-2.8
FZD5	7855	frizzled family receptor 5	2 out of 3	87.4068					27.8589	0.0085	fold change	2.79	59.5479	0.0046	fold change	4.58
DOK4	55715	docking protein 4	2 out of 3	87.3886					27.6086	0.0013	fold change	2.77	59.78	0.0095	fold change	4.62
NAV1	89796	neuron navigator 1	2 out of 3	87.2806					36.4076	0.0007	fold change	3.64	50.873	0.0003	fold change	-3.6
AP1M2	10053	adaptor-related protein complex 1, mu 2 subunit	2 out of 3	87.2008					48.4276	0.002	fold change	-5.5	38.7732	0.0005	fold change	2.71
1562640_at	NA		2 out of 3	87.146					63.2559	0.0061	fold change	10.4	23.8901	0.0052	fold change	1.93
AL360145	NA		2 out of 3	87.1304					37.5302	0.0156	fold change	-3.79	49.6002	0.0003	fold change	3.51
NOV	4856	nephroblastoma overexpressed	2 out of 3	87.1265					70.7574	0.0005	fold change	-15.2	16.3691	0.0191	fold change	-1.59
AA133285	NA		2 out of 3	87.059					65.8302	0.0006	fold change	-11.8	21.2288	0.0006	fold change	-1.81
EPN3	55040	epsin 3	2 out of 3	87.0501					60.0716	0.0005	fold change	-8.85	26.9785	0.0058	fold change	2.07
ALDH2	217	aldehyde dehydrogenase 2 family (mitochondrial)	2 out of 3	87.0348					66.5797	0.0004	fold change	12.2	20.4552	0.0072	fold change	1.78
SLFN12	55106	schlafen family member 12	2 out of 3	87.0206					26.416	0.0004	fold change	-2.66	60.6046	0.002	fold change	-4.73
AJUBA	84962	ajuba LIM protein	2 out of 3	86.8837					48.677	0.0037	fold change	-5.53	38.2067	0.0002	fold change	-2.67
IL22RA1	58985	interleukin 22 receptor, alpha 1	2 out of 3	86.7377					62.1056	0.0025	fold change	9.8	24.6321	0.0098	fold change	1.96
GABRE	2564	gamma-aminobutyric acid (GABA) A receptor, epsilon	2 out of 3	86.6818					34.7996	0.0068	fold change	3.47	51.8823	0.0025	fold change	3.71
PTK6	5753	PTK6 protein tyrosine kinase 6	2 out of 3	86.6782					31.0385	0.0179	fold change	-3.1	55.6396	0.0165	fold change	4.08
C10orf54	64115	chromosome 10 open reading frame 54	2 out of 3	86.6456					66.3993	0.0019	fold change	12.1	20.2463	0.0333	fold change	-1.77
BCL2L15	440603	BCL2-like 15	2 out of 3	86.6167					57.7027	0.0143	fold change	7.96	28.9139	0.0193	fold change	2.16
HERC5	51191	HECT and RLD domain containing E3 ubiquitin protein ligase 5	2 out of 3	86.583					16.2308	0.0353	fold change	-1.88	70.3522	0.0038	fold change	-6.61
SOWAHA	134548	sosondowah ankyrin repeat domain family member A	2 out of 3	86.4363					33.0677	0.0425	fold change	3.3	53.3686	0.0001	fold change	3.84
RHOQ	23433	ras homolog family member Q	2 out of 3	86.4043					21.8865	0.0195	fold change	-2.31	64.5178	0.0162	fold change	-5.38
SERPINB9	5272	serpin peptidase inhibitor, clade B (ovalbumin), member 9	2 out of 3	86.3566					28.217	0.0181	fold change	2.82	58.1395	0.0014	fold change	-4.39
TNFRSF1B	7133	tumor necrosis factor receptor superfamily, member 1B	2 out of 3	86.2699					51.2122	0.001	fold change	6.1	35.0577	0.0046	fold change	2.49
ZNF185	7739	zinc finger protein 185 (LIM domain)	2 out of 3	86.1901					60.0716	0.0036	fold change	-8.85	26.1185	0.0038	fold change	-2.03
WDR52	55779	WD repeat domain 52	2 out of 3	86.1696					41.4261	0.0474	fold change	-4.32	44.7435	0.0061	fold change	3.11
TIMP4	7079	TIMP metallopeptidase inhibitor 4	2 out of 3	86.0703					63.0612	0.0034	fold change	10.3	23.009	0.0185	fold change	1.89
LOC100505812	100505812	uncharacterized LOC100505812	2 out of 3	86.0628					63.4848	1.5e-05	fold change	-10.5	22.578	0.0271	fold change	-1.87
ULBP2	80328	UL16 binding protein 2	2 out of 3	86.0339					58.388	0.018	fold change	-8.26	27.6458	0.027	fold change	-2.1
CCDC80	151887	coiled-coil domain containing 80	2 out of 3	85.992					45.6404	0.0007	fold change	-4.99	40.3515	0.0088	fold change	-2.81
CCND2	894	cyclin D2	2 out of 3	85.9794					10.486	0.0428	fold change	1.44	75.4933	0.0004	fold change	-7.86
F11R	50848	F11 receptor	2 out of 3	85.9231					11.1187	0.0114	fold change	-1.49	74.8044	0.0004	fold change	7.74
BC030754	NA		2 out of 3	85.8906					44.9067	0.0025	fold change	-4.87	40.9839	0.0019	fold change	2.84
TNFRSF19	55504	tumor necrosis factor receptor superfamily, member 19	2 out of 3	85.8702					61.9801	0.0077	fold change	9.73	23.8901	0.0013	fold change	1.93
1555551_at	NA		2 out of 3	85.8267					40.3382	0.006	fold change	-4.14	45.4885	0.0335	fold change	3.18
205980_s_at	NA		2 out of 3	85.6614					42.107	0.0018	fold change	-4.42	43.5544	0.0013	fold change	3.02
HSPA12A	259217	heat shock 70kDa protein 12A	2 out of 3	85.6599					50.1258	0.0119	fold change	5.79	35.5341	0.0059	fold change	-2.52
TSPAN15	23555	tetraspanin 15	2 out of 3	85.6391					16.6688	0.0073	fold change	1.91	68.9703	0.0005	fold change	6.3
TPD52L1	7164	tumor protein D52-like 1	2 out of 3	85.6					32.2774	0.0218	fold change	-3.22	53.3225	6.3e-06	fold change	3.83
GXYLT2	727936	glucoside xylosyltransferase 2	2 out of 3	85.5783					11.5393	0.0496	fold change	-1.52	74.039	0.0005	fold change	-7.6
AV700891	NA		2 out of 3	85.486					36.9437	0.0286	fold change	-3.71	48.5423	0.0198	fold change	3.42
STX19	415117	syntaxin 19	2 out of 3	85.4551					19.5538	0.025	fold change	-2.14	65.9013	0.0039	fold change	5.61
CFL2	1073	cofilin 2 (muscle)	2 out of 3	85.4382					35.6369	0.0052	fold change	-3.56	49.8013	0.0024	fold change	-3.52
AI611074	NA		2 out of 3	85.4213					64.7216	4.2e-06	fold change	-11.2	20.6997	0.0036	fold change	-1.79
FRMD4A	55691	FERM domain containing 4A	2 out of 3	85.4079					23.6146	0.0168	fold change	-2.44	61.7932	0.0029	fold change	-4.89
FAM176C	59271	family with sequence similarity 176, member C	2 out of 3	85.402					36.14	0.0032	fold change	3.61	49.2621	0.0023	fold change	3.49
SLC44A2	57153	solute carrier family 44, member 2	2 out of 3	85.3123					71.7484	0.0019	fold change	-15.9	13.564	0.0141	fold change	1.45
STEAP1	26872	six transmembrane epithelial antigen of the prostate 1	2 out of 3	85.2834					58.305	7.4e-06	fold change	8.22	26.9785	0.004	fold change	2.07
CLIP4	79745	CAP-GLY domain containing linker protein family, member 4	2 out of 3	85.2035					29.2094	0.0044	fold change	-2.91	55.9942	0.0009	fold change	-4.13
AA701676	NA		2 out of 3	85.1735					58.195	0.0032	fold change	-8.19	26.9785	0.0017	fold change	2.07
SOCS2	8835	suppressor of cytokine signaling 2	2 out of 3	85.1123					38.5907	0.0232	fold change	-3.91	46.5216	0.0028	fold change	-3.27
UBE2L6	9246	ubiquitin-conjugating enzyme E2L 6	2 out of 3	85.0991					51.2763	0.0023	fold change	-6.11	33.8229	0.0019	fold change	-2.41
PRSS3P2	154754	protease, serine, 3 pseudogene 2	2 out of 3	84.8132					33.601	0.0022	fold change	3.35	51.2122	0.0017	fold change	3.64
ATP2C2	9914	ATPase, Ca++ transporting, type 2C, member 2	2 out of 3	84.7916					43.4771	0.0028	fold change	-4.66	41.3145	0.0114	fold change	2.86
ZBTB10	65986	zinc finger and BTB domain containing 10	2 out of 3	84.7563					47.5105	0.0004	fold change	-5.31	37.2459	0.0099	fold change	-2.61
TRIM6	117854	tripartite motif containing 6	2 out of 3	84.4693					13.9156	0.0436	fold change	1.7	70.5537	0.0005	fold change	-6.64
PDLIM2	64236	PDZ and LIM domain 2 (mystique)	2 out of 3	84.3648					22.2591	0.0248	fold change	2.34	62.1056	0.01	fold change	-4.96
BAMBI	25805	BMP and activin membrane-bound inhibitor homolog (Xenopus laevis)	2 out of 3	84.2832					64.4837	0.0009	fold change	11.1	19.7995	0.0179	fold change	-1.75
CEACAM7	1087	carcinoembryonic antigen-related cell adhesion molecule 7	2 out of 3	84.2325					49.5801	0.0025	fold change	-5.69	34.6524	0.0136	fold change	2.46
C9orf72	203228	chromosome 9 open reading frame 72	2 out of 3	84.1637					64.9612	0.0013	fold change	-11.4	19.2025	0.029	fold change	-1.72
ZDHHC23	254887	zinc finger, DHHC-type containing 23	2 out of 3	84.1553					15.7222	0.0478	fold change	-1.84	68.4332	0.0013	fold change	6.1
TP53	7157	tumor protein p53	2 out of 3	84.1394					64.7216	0.0016	fold change	-11.2	19.4179	0.0006	fold change	1.73
H1F0	3005	H1 histone family, member 0	2 out of 3	84.1306					52.4356	0.005	fold change	6.35	31.6949	0.0029	fold change	2.29
AI733281	NA		2 out of 3	83.9487					50.1258	0.0004	fold change	5.79	33.8229	0.0185	fold change	2.41
NRIP3	56675	nuclear receptor interacting protein 3	2 out of 3	83.8969					31.4838	0.0028	fold change	-3.14	52.4131	3.4e-07	fold change	-3.76
ARMCX6	54470	armadillo repeat containing, X-linked 6	2 out of 3	83.8754					62.9644	0.0002	fold change	-10.2	20.9111	0.0026	fold change	-1.8
SIAE	54414	sialic acid acetylesterase	2 out of 3	83.8698					29.6534	0.0103	fold change	2.95	54.2164	0.0014	fold change	3.95
FAM69A	388650	family with sequence similarity 69, member A	2 out of 3	83.6905					58.195	0.0203	fold change	-8.19	25.4955	0.0015	fold change	-2
BIRC3	330	baculoviral IAP repeat containing 3	2 out of 3	83.683					36.7888	0.0102	fold change	3.7	46.8942	0.0105	fold change	-3.3
TCEAL8	90843	transcription elongation factor A (SII)-like 8	2 out of 3	83.4397					32.7766	0.04	fold change	-3.27	50.6632	0.0004	fold change	-3.58
FGF13	2258	fibroblast growth factor 13	2 out of 3	83.4228					69.4773	4e-06	fold change	-14.2	13.9456	0.011	fold change	-1.47
PAPOLA	10914	poly(A) polymerase alpha	2 out of 3	83.271					15.8519	1.4e-05	fold change	-1.85	67.4191	6.1e-05	fold change	5.95
GRHL1	29841	grainyhead-like 1 (Drosophila)	2 out of 3	83.2597					20.6164	0.0153	fold change	-2.22	62.6433	0.0001	fold change	5.06
O3FAR1	338557	omega-3 fatty acid receptor 1	2 out of 3	83.2358					13.9156	0.0419	fold change	1.7	69.3202	0.004	fold change	6.36
R92925	NA		2 out of 3	83.1936					15.5886	0.0346	fold change	-1.83	67.605	0.0014	fold change	-5.98
C3	718	complement component 3	2 out of 3	83.1787					40.6048	0.0014	fold change	-4.18	42.5738	0.007	fold change	-2.94
DLC1	10395	deleted in liver cancer 1	2 out of 3	83.1517					19.4363	0.0145	fold change	-2.13	63.7154	0.0036	fold change	-5.24
MEIS1	4211	Meis homeobox 1	2 out of 3	83.0525					65.8302	0.0019	fold change	-11.8	17.2223	0.0016	fold change	1.63
KANSL1-AS1	644246	KANSL1 antisense RNA 1	2 out of 3	83.0313					64.4837	0.0004	fold change	11.1	18.5476	0.0128	fold change	1.69
EPHX1	2052	epoxide hydrolase 1, microsomal (xenobiotic)	2 out of 3	82.9548					42.6032	0.0037	fold change	4.5	40.3515	0.0015	fold change	2.81
FZD6	8323	frizzled family receptor 6	2 out of 3	82.7446					58.1125	0.0012	fold change	-8.18	24.6321	0.0029	fold change	-1.96
ZNF813	126017	zinc finger protein 813	2 out of 3	82.7305					59.7215	0.0032	fold change	-8.74	23.009	0.0017	fold change	1.89
GRAMD1B	57476	GRAM domain containing 1B	2 out of 3	82.728					49.5801	0.0084	fold change	5.69	33.1479	0.0025	fold change	2.37
LRRC1	55227	leucine rich repeat containing 1	2 out of 3	82.5458					41.2313	0.0002	fold change	4.29	41.3145	0.0009	fold change	2.86
BICD2	23299	bicaudal D homolog 2 (Drosophila)	2 out of 3	82.5255					31.4838	0.0008	fold change	-3.14	51.0418	0.0003	fold change	-3.63
LIPG	9388	lipase, endothelial	2 out of 3	82.4475					53.8364	0.0028	fold change	-6.69	28.6112	0.0048	fold change	2.15
GABBR2	9568	gamma-aminobutyric acid (GABA) B receptor, 2	2 out of 3	82.444					9.63302	0.04	fold change	1.37	72.8109	0.0068	fold change	-7.27
FGFR1	2260	fibroblast growth factor receptor 1	2 out of 3	82.3582					42.1649	0.0024	fold change	4.44	40.1932	0.005	fold change	-2.8
SERINC5	256987	serine incorporator 5	2 out of 3	82.3357					18.1211	0.0009	fold change	2.02	64.2145	0.0003	fold change	5.33
ST6GALNAC2	10610	ST6 (alpha-N-acetyl-neuraminyl-2,3-beta-galactosyl-1,3)-N-acetylgalactosaminide alpha-2,6-sialyltransferase 2	2 out of 3	82.242					70.2711	4.1e-05	fold change	-14.8	11.9709	0.0204	fold change	-1.36
RDX	5962	radixin	2 out of 3	82.1952					21.1996	0.0033	fold change	-2.26	60.9957	0.0232	fold change	-4.76
NEBL	10529	nebulette	2 out of 3	82.1899					54.7477	0.008	fold change	-6.93	27.4422	0.0153	fold change	-2.09
LYRM1	57149	LYR motif containing 1	2 out of 3	82.1011					52.5475	0.0006	fold change	6.38	29.5536	0.0022	fold change	2.19
ABCC3	8714	ATP-binding cassette, sub-family C (CFTR/MRP), member 3	2 out of 3	82.0572					37.3137	0.0003	fold change	3.77	44.7435	0.0003	fold change	3.11
PRICKLE1	144165	prickle homolog 1 (Drosophila)	2 out of 3	82.0392					25.6338	0.0107	fold change	-2.6	56.4054	0.0157	fold change	-4.16
TMEM67	91147	transmembrane protein 67	2 out of 3	82.0365					40.9293	0.0157	fold change	-4.23	41.1073	0.0131	fold change	-2.85
GCNT2	2651	glucosaminyl (N-acetyl) transferase 2, I-branching enzyme (I blood group)	2 out of 3	81.9794					14.9642	0.0064	fold change	-1.78	67.0151	0.0005	fold change	-5.84
SSFA2	6744	sperm specific antigen 2	2 out of 3	81.9541					65.585	9.8e-05	fold change	11.7	16.3691	0.0438	fold change	1.59
ICAM1	3383	intercellular adhesion molecule 1	2 out of 3	81.8959					15.9589	0.0237	fold change	-1.86	65.937	0.0034	fold change	-5.62
CFB	629	complement factor B	2 out of 3	81.8778					52.1241	0.0032	fold change	6.29	29.7538	0.0096	fold change	2.2
PLEKHH2	130271	pleckstrin homology domain containing, family H (with MyTH4 domain) member 2	2 out of 3	81.8185					69.0093	0.0026	fold change	-13.9	12.8091	0.0015	fold change	1.41
CREB3L1	90993	cAMP responsive element binding protein 3-like 1	2 out of 3	81.6496					43.912	0.0316	fold change	4.7	37.7376	0.0032	fold change	2.64
AA480392	NA		2 out of 3	81.6494					28.0945	0.0304	fold change	-2.81	53.555	0.0048	fold change	-3.88
BAG1	573	BCL2-associated athanogene	2 out of 3	81.6394					35.8971	0.0026	fold change	-3.59	45.7423	0.0016	fold change	3.21
GLIS3	169792	GLIS family zinc finger 3	2 out of 3	81.6305					37.3706	0.0003	fold change	3.78	44.2599	0.0284	fold change	-3.07
MTMR11	10903	myotubularin related protein 11	2 out of 3	81.6301					16.6688	0.0054	fold change	1.91	64.9612	0.0018	fold change	5.45
TP73-AS1	57212	TP73 antisense RNA 1	2 out of 3	81.4947					32.9524	0.0021	fold change	-3.29	48.5423	0.0007	fold change	-3.42
ZNF512B	57473	zinc finger protein 512B	2 out of 3	81.4022					49.9022	0.0234	fold change	-5.76	31.5	0.0078	fold change	-2.28
LIFR	3977	leukemia inhibitory factor receptor alpha	2 out of 3	81.3355					22.103	0.0041	fold change	-2.33	59.2326	0.0004	fold change	-4.53
MGST2	4258	microsomal glutathione S-transferase 2	2 out of 3	81.2983					13.9156	0.0039	fold change	1.7	67.3827	0.0004	fold change	5.94
CRIM1	51232	cysteine rich transmembrane BMP regulator 1 (chordin-like)	2 out of 3	81.2868					24.8814	0.0006	fold change	2.54	56.4054	0.0003	fold change	-4.16
TTC22	55001	tetratricopeptide repeat domain 22	2 out of 3	81.2149					12.4372	0.0216	fold change	-1.59	68.7777	0.0005	fold change	6.23
AU146685	NA		2 out of 3	81.2087					59.4615	0.0138	fold change	-8.69	21.7472	0.0076	fold change	-1.83
OAS1	4938	2'-5'-oligoadenylate synthetase 1, 40/46kDa	2 out of 3	81.0117					58.0026	0.0003	fold change	8.09	23.009	0.0106	fold change	1.89
MYL9	10398	myosin, light chain 9, regulatory	2 out of 3	80.9112					12.97	0.0319	fold change	-1.63	67.9412	0.0018	fold change	-6.03
ITGA1	3672	integrin, alpha 1	2 out of 3	80.7999					55.6898	0.0004	fold change	-7.21	25.1101	0.0337	fold change	1.98
DGAT1	8694	diacylglycerol O-acyltransferase 1	2 out of 3	80.7463					42.107	0.0012	fold change	4.42	38.6393	0.0018	fold change	2.7
AI862542	NA		2 out of 3	80.7019					64.1141	3.3e-05	fold change	-10.8	16.5878	0.0053	fold change	-1.6
NT5E	4907	5'-nucleotidase, ecto (CD73)	2 out of 3	80.6949					40.6587	0.0175	fold change	4.19	40.0362	0.0012	fold change	-2.79
FRMD4B	23150	FERM domain containing 4B	2 out of 3	80.4828					19.305	0.0351	fold change	2.12	61.1778	0.005	fold change	4.79
STXBP5	134957	syntaxin binding protein 5 (tomosyn)	2 out of 3	80.4826					45.2542	0.0021	fold change	-4.92	35.2284	0.0165	fold change	-2.5
RAB11FIP1	80223	RAB11 family interacting protein 1 (class I)	2 out of 3	80.4341					24.1576	0.0109	fold change	2.48	56.2765	0.0016	fold change	4.15
BAIAP2L1	55971	BAI1-associated protein 2-like 1	2 out of 3	80.4241					55.314	1.3e-06	fold change	7.09	25.1101	0.0052	fold change	1.98
ENPP1	5167	ectonucleotide pyrophosphatase/phosphodiesterase 1	2 out of 3	80.4097					41.6365	0.0059	fold change	4.35	38.7732	0.0003	fold change	-2.71
TSPAN5	10098	tetraspanin 5	2 out of 3	80.2572					66.8691	0.0008	fold change	-12.5	13.3881	0.0234	fold change	-1.44
IL6ST	3572	interleukin 6 signal transducer (gp130, oncostatin M receptor)	2 out of 3	80.2532					10.6183	0.0191	fold change	1.45	69.635	0.0001	fold change	-6.44
SRD5A1	6715	steroid-5-alpha-reductase, alpha polypeptide 1 (3-oxo-5 alpha-steroid delta 4-dehydrogenase alpha 1)	2 out of 3	80.224					14.4285	0.0002	fold change	-1.74	65.7955	0.0011	fold change	5.6
QSOX1	5768	quiescin Q6 sulfhydryl oxidase 1	2 out of 3	80.2025					40.6048	0.0006	fold change	-4.18	39.5977	0.0003	fold change	-2.76
PON2	5445	paraoxonase 2	2 out of 3	80.0865					38.5907	0.0006	fold change	3.91	41.4958	0.0055	fold change	2.87
CYP2J2	1573	cytochrome P450, family 2, subfamily J, polypeptide 2	2 out of 3	80.0832					51.1692	0.0007	fold change	-6.08	28.9139	0.007	fold change	2.16
CLIC5	53405	chloride intracellular channel 5	2 out of 3	80.0655					9.63302	0.0274	fold change	1.37	70.4325	0.001	fold change	6.62
KRT8	3856	keratin 8	2 out of 3	80.0131					41.8064	0.0005	fold change	4.37	38.2067	0.0015	fold change	2.67
PKIG	11142	protein kinase (cAMP-dependent, catalytic) inhibitor gamma	2 out of 3	79.9932					26.2749	0.0336	fold change	-2.65	53.7184	0.0019	fold change	-3.9
GLS2	27165	glutaminase 2 (liver, mitochondrial)	2 out of 3	79.992					17.3487	0.0424	fold change	-1.96	62.6433	0.0005	fold change	5.06
PDP2	57546	pyruvate dehyrogenase phosphatase catalytic subunit 2	2 out of 3	79.9905					51.8382	0.0022	fold change	-6.24	28.1524	0.0029	fold change	-2.13
SNX8	29886	sorting nexin 8	2 out of 3	79.9241					47.5105	0.0001	fold change	5.31	32.4137	0.0001	fold change	-2.33
LGMN	5641	legumain	2 out of 3	79.9232					11.794	0.0017	fold change	1.54	68.1292	0.0003	fold change	6.05
PLTP	5360	phospholipid transfer protein	2 out of 3	79.9179					28.4918	0.0326	fold change	-2.84	51.426	0.0095	fold change	3.66
AI307745	NA		2 out of 3	79.886					37.9942	0.0286	fold change	-3.85	41.8918	0.0216	fold change	2.9
MGLL	11343	monoglyceride lipase	2 out of 3	79.8421					29.5109	0.0058	fold change	2.94	50.3312	0.0003	fold change	3.55
NPTN	27020	neuroplastin	2 out of 3	79.8165					51.6641	0.0044	fold change	-6.2	28.1524	0.0152	fold change	2.13
MAP7D1	55700	MAP7 domain containing 1	2 out of 3	79.8062					22.3726	0.0007	fold change	-2.35	57.4336	0.0117	fold change	-4.29
GPR35	2859	G protein-coupled receptor 35	2 out of 3	79.8012					44.7435	0.0002	fold change	4.84	35.0577	0.0056	fold change	2.49
HPDL	84842	4-hydroxyphenylpyruvate dioxygenase-like	2 out of 3	79.7638					27.3507	0.0035	fold change	-2.74	52.4131	0.0003	fold change	3.76
FAM221A	340277	family with sequence similarity 221, member A	2 out of 3	79.7367					38.1002	0.0453	fold change	3.86	41.6365	0.0148	fold change	2.88
LEF1	51176	lymphoid enhancer-binding factor 1	2 out of 3	79.7229					46.259	0.0028	fold change	-5.08	33.4638	0.0114	fold change	-2.39
202762_at	NA		2 out of 3	79.7114					48.9678	1.6e-05	fold change	5.6	30.7437	0.0012	fold change	2.24
MIA2	117153	melanoma inhibitory activity 2	2 out of 3	79.7072					45.0548	0.0014	fold change	4.89	34.6524	0.0197	fold change	2.46
CHDH	55349	choline dehydrogenase	2 out of 3	79.6078					15.9589	0.003	fold change	-1.86	63.6489	0.0028	fold change	5.22
NBL1	4681	neuroblastoma, suppression of tumorigenicity 1	2 out of 3	79.4726					41.1347	9.5e-06	fold change	4.25	38.338	0.0013	fold change	2.68
EFNB2	1948	ephrin-B2	2 out of 3	79.4721					30.6211	0.0424	fold change	3.06	48.851	0.0027	fold change	3.45
AIG1	51390	androgen-induced 1	2 out of 3	79.4259					62.6433	6.5e-05	fold change	-10.1	16.7826	0.0403	fold change	-1.61
IL17RB	55540	interleukin 17 receptor B	2 out of 3	79.413					17.6198	0.0134	fold change	-1.98	61.7932	0.0155	fold change	4.89
CTAGE5	4253	CTAGE family, member 5	2 out of 3	79.3632					36.5374	0.0236	fold change	-3.66	42.8258	0.0001	fold change	2.96
ABCC2	1244	ATP-binding cassette, sub-family C (CFTR/MRP), member 2	2 out of 3	79.3629					56.3539	0.0066	fold change	7.52	23.009	0.0009	fold change	1.89
SEMA4G	57715	sema domain, immunoglobulin domain (Ig), transmembrane domain (TM) and short cytoplasmic domain, (semaphorin) 4G	2 out of 3	79.3374					46.7692	0.007	fold change	5.17	32.5682	0.0053	fold change	2.34
CGNL1	84952	cingulin-like 1	2 out of 3	79.2352					64.7216	0.0014	fold change	-11.2	14.5137	0.0011	fold change	-1.5
ACPL2	92370	acid phosphatase-like 2	2 out of 3	79.2183					65.8302	0.0037	fold change	-11.8	13.3881	0.0141	fold change	1.44
MYEOV	26579	myeloma overexpressed (in a subset of t(11;14) positive multiple myelomas)	2 out of 3	79.1948					10.8757	0.0053	fold change	1.47	68.3191	0.0006	fold change	6.09
STEAP2	261729	STEAP family member 2, metalloreductase	2 out of 3	79.1629					63.4848	0.0004	fold change	10.5	15.6781	0.0079	fold change	1.56
LAT2	7462	linker for activation of T cells family, member 2	2 out of 3	79.0661					11.794	0.003	fold change	1.54	67.2721	0.0002	fold change	-5.88
AL049245	NA		2 out of 3	78.9856					20.2063	0.0097	fold change	2.19	58.7793	0.0062	fold change	-4.48
SLC22A3	6581	solute carrier family 22 (extraneuronal monoamine transporter), member 3	2 out of 3	78.9604					11.3928	0.0266	fold change	1.51	67.5676	0.008	fold change	5.97
MT1G	4495	metallothionein 1G	2 out of 3	78.9401					20.4961	0.0201	fold change	-2.21	58.444	0.0012	fold change	-4.42
DENND5A	23258	DENN/MADD domain containing 5A	2 out of 3	78.6962					23.0566	0.01	fold change	2.4	55.6396	0.0019	fold change	-4.08
CFLAR	8837	CASP8 and FADD-like apoptosis regulator	2 out of 3	78.6402					66.0075	0.0008	fold change	11.9	12.6327	0.0107	fold change	-1.4
ATP2A3	489	ATPase, Ca++ transporting, ubiquitous	2 out of 3	78.6356					20.4961	0.0078	fold change	2.21	58.1395	0.0059	fold change	4.39
PER2	8864	period homolog 2 (Drosophila)	2 out of 3	78.5426					32.6635	0.0457	fold change	-3.26	45.8791	0.0052	fold change	3.22
JAG2	3714	jagged 2	2 out of 3	78.37					44.388	0.0025	fold change	-4.78	33.9819	0.0012	fold change	2.42
TMCO3	55002	transmembrane and coiled-coil domains 3	2 out of 3	78.1871					20.9003	0.045	fold change	-2.24	31.8758	0.0012	fold change	-2.3
AU154125	NA		2 out of 3	78.1526					56.4054	0.0063	fold change	-7.53	21.7472	0.045	fold change	-1.83
ARHGAP18	93663	Rho GTPase activating protein 18	2 out of 3	78.0989					44.276	7.1e-05	fold change	4.75	33.8229	0.0102	fold change	2.41
TXNRD1	7296	thioredoxin reductase 1	2 out of 3	78.0951					46.7159	0.0367	fold change	5.16	31.3792	0.0002	fold change	-2.27
HACE1	57531	HECT domain and ankyrin repeat containing E3 ubiquitin protein ligase 1	2 out of 3	78.0657					43.3546	0.0273	fold change	-4.64	34.7111	0.0095	fold change	-2.47
SLC26A2	1836	solute carrier family 26 (sulfate transporter), member 2	2 out of 3	77.9461					12.0448	0.0168	fold change	-1.56	65.9013	0.0003	fold change	-5.61
IL1B	3553	interleukin 1, beta	2 out of 3	77.8551					37.8189	0.0058	fold change	-3.83	40.0362	0.0003	fold change	-2.79
GRTP1	79774	growth hormone regulated TBC protein 1	2 out of 3	77.8447					9.29712	0.0245	fold change	1.34	68.5476	0.0057	fold change	6.12
EML6	400954	echinoderm microtubule associated protein like 6	2 out of 3	77.8341					40.3382	0.0004	fold change	4.14	37.4959	0.0018	fold change	2.62
EHHADH	1962	enoyl-CoA, hydratase/3-hydroxyacyl CoA dehydrogenase	2 out of 3	77.6978					11.2623	0.0018	fold change	-1.5	66.4355	0.0086	fold change	5.74
OAS2	4939	2'-5'-oligoadenylate synthetase 2, 69/71kDa	2 out of 3	77.6363					28.7853	0.0295	fold change	-2.87	48.851	0.007	fold change	-3.45
CMBL	134147	carboxymethylenebutenolidase homolog (Pseudomonas)	2 out of 3	77.5717					39.636	0.0043	fold change	4.04	37.9357	0.0025	fold change	2.65
PALLD	23022	palladin, cytoskeletal associated protein	2 out of 3	77.5263					41.4817	8.9e-05	fold change	-4.33	36.0446	0.0038	fold change	-2.55
MDFIC	29969	MyoD family inhibitor domain containing	2 out of 3	77.4008					22.012	0.0198	fold change	2.32	55.3888	0.0055	fold change	-4.06
CPS1	1373	carbamoyl-phosphate synthase 1, mitochondrial	2 out of 3	77.0386					65.2367	5e-05	fold change	-11.5	11.8019	0.0101	fold change	-1.35
MPP1	4354	membrane protein, palmitoylated 1, 55kDa	2 out of 3	76.9705					52.8413	0.0001	fold change	6.43	24.1292	0.0036	fold change	-1.94
240303_at	NA		2 out of 3	76.9571					53.5315	0.0233	fold change	6.6	23.4257	0.0268	fold change	1.91
BAG2	9532	BCL2-associated athanogene 2	2 out of 3	76.9129					37.8189	0.0007	fold change	3.83	39.094	0.0113	fold change	-2.73
BC015866	NA		2 out of 3	76.9113					51.6204	0.001	fold change	-6.19	25.291	0.007	fold change	1.99
TBC1D8B	54885	TBC1 domain family, member 8B (with GRAM domain)	2 out of 3	76.8653					24.7412	0.0021	fold change	2.53	52.1241	0.0018	fold change	3.74
KGFLP1	387628	fibroblast growth factor 7 pseudogene	2 out of 3	76.7522					48.5998	0.0063	fold change	-5.52	28.1524	0.0388	fold change	-2.13
CYB5A	1528	cytochrome b5 type A (microsomal)	2 out of 3	76.7492					29.855	0.0399	fold change	-2.97	46.8942	0.0002	fold change	3.3
NUAK1	9891	NUAK family, SNF1-like kinase, 1	2 out of 3	76.7459					25.0386	0.0019	fold change	-2.55	51.7074	0.0005	fold change	-3.68
228108_at	NA		2 out of 3	76.7332					24.3201	0.0183	fold change	-2.49	52.4131	0.0029	fold change	3.76
NME4	4833	NME/NM23 nucleoside diphosphate kinase 4	2 out of 3	76.7205					29.2651	0.0449	fold change	2.92	47.4554	0.0188	fold change	-3.33
ST6GAL1	6480	ST6 beta-galactosamide alpha-2,6-sialyltranferase 1	2 out of 3	76.6912					14.1756	0.0199	fold change	-1.72	62.5156	0.0016	fold change	5.05
AW206286	NA		2 out of 3	76.6587					26.5529	0.0017	fold change	-2.67	50.1057	0.0069	fold change	-3.54
EPS8	2059	epidermal growth factor receptor pathway substrate 8	2 out of 3	76.6581					16.3801	0.0096	fold change	1.89	60.278	0.0002	fold change	4.69
TMEM220	388335	transmembrane protein 220	2 out of 3	76.6383					24.5143	0.0077	fold change	2.51	52.1241	0.0002	fold change	-3.74
MFSD6	54842	major facilitator superfamily domain containing 6	2 out of 3	76.5722					19.8282	0.0006	fold change	2.16	56.744	0.0244	fold change	4.19
SAMD5	389432	sterile alpha motif domain containing 5	2 out of 3	76.5366					28.9343	0.0306	fold change	-2.88	47.6023	0.0031	fold change	3.34
WDR47	22911	WD repeat domain 47	2 out of 3	76.4824					35.1679	0.0001	fold change	-3.51	41.3145	0.0243	fold change	-2.86
LINC00460	728192	long intergenic non-protein coding RNA 460	2 out of 3	76.4732					47.862	0.0038	fold change	5.39	28.6112	0.0064	fold change	-2.15
KLHL4	56062	kelch-like 4 (Drosophila)	2 out of 3	76.4486					24.7412	0.0067	fold change	2.53	51.7074	0.0044	fold change	-3.68
MAFF	23764	v-maf musculoaponeurotic fibrosarcoma oncogene homolog F (avian)	2 out of 3	76.4203					16.2308	0.001	fold change	1.88	60.1895	0.003	fold change	-4.67
PRCP	5547	prolylcarboxypeptidase (angiotensinase C)	2 out of 3	76.3612					26.03	0.0007	fold change	-2.63	50.3312	2e-05	fold change	-3.55
CLIP1	6249	CAP-GLY domain containing linker protein 1	2 out of 3	76.1175					46.3637	0.0021	fold change	-5.11	29.7538	0.0016	fold change	-2.2
AK024898	NA		2 out of 3	75.9493					65.8302	0.0006	fold change	-11.8	10.1191	0.0305	fold change	1.22
BCL2	596	B-cell CLL/lymphoma 2	2 out of 3	75.8829					61.5453	0.0002	fold change	-9.58	14.3376	0.0177	fold change	-1.49
C6orf228	221710	chromosome 6 open reading frame 228	2 out of 3	75.8345					39.7899	0.0055	fold change	-4.06	36.0446	0.0002	fold change	-2.55
RDH13	112724	retinol dehydrogenase 13 (all-trans/9-cis)	2 out of 3	75.829					37.6223	0.0021	fold change	-3.8	38.2067	0.0213	fold change	2.67
UAP1	6675	UDP-N-acteylglucosamine pyrophosphorylase 1	2 out of 3	75.8247					18.5785	0.0035	fold change	2.06	57.2462	2.6e-05	fold change	-4.27
SELM	140606	selenoprotein M	2 out of 3	75.7597					27.2174	0.0335	fold change	2.73	48.5423	0.0187	fold change	-3.42
SYNM	23336	synemin, intermediate filament protein	2 out of 3	75.7053					33.8135	0.0119	fold change	-3.37	41.8918	0.0005	fold change	-2.9
PRR15L	79170	proline rich 15-like	2 out of 3	75.6896					18.8145	0.006	fold change	2.08	56.8751	0.0192	fold change	4.21
LOXL1-AS1	100287616	LOXL1 antisense RNA 1	2 out of 3	75.5817					14.586	0.0414	fold change	-1.75	60.9957	0.0004	fold change	4.76
KRT80	144501	keratin 80	2 out of 3	75.5688					14.9642	0.0172	fold change	1.78	60.6046	0.0026	fold change	-4.73
EYA2	2139	eyes absent homolog 2 (Drosophila)	2 out of 3	75.5373					60.4259	0.0027	fold change	-9.01	15.1114	0.0469	fold change	-1.53
HBS1L	10767	HBS1-like (S. cerevisiae)	2 out of 3	75.5235					27.3994	0.002	fold change	-2.75	48.1241	0.0207	fold change	-3.39
CCDC104	112942	coiled-coil domain containing 104	2 out of 3	75.519					28.7853	0.0123	fold change	2.87	46.7338	0.001	fold change	-3.29
SLC35F3	148641	solute carrier family 35, member F3	2 out of 3	75.4391					55.6396	0.0118	fold change	7.18	19.7995	0.028	fold change	-1.75
CEP170	9859	centrosomal protein 170kDa	2 out of 3	75.3971					29.3981	0.0092	fold change	2.93	45.999	0.0013	fold change	-3.23
EDIL3	10085	EGF-like repeats and discoidin I-like domains 3	2 out of 3	75.3598					37.6223	0.0219	fold change	-3.8	37.7376	0.0014	fold change	2.64
GALNT5	11227	UDP-N-acetyl-alpha-D-galactosamine:polypeptide N-acetylgalactosaminyltransferase 5 (GalNAc-T5)	2 out of 3	75.3114					38.8715	0.0008	fold change	3.95	36.44	0.0257	fold change	2.57
SERTAD4	56256	SERTA domain containing 4	2 out of 3	75.2867					63.4848	0.0003	fold change	-10.5	11.8019	0.0307	fold change	-1.35
ISYNA1	51477	inositol-3-phosphate synthase 1	2 out of 3	75.0494					27.7582	0.0224	fold change	-2.78	47.2912	0.0015	fold change	-3.32
DDHD1	80821	DDHD domain containing 1	2 out of 3	75.023					52.014	0.0201	fold change	-6.26	23.009	0.0275	fold change	-1.89
230660_at	NA		2 out of 3	75.0192					64.3484	3.5e-05	fold change	-11	10.6708	0.0471	fold change	-1.27
TUBB2A	7280	tubulin, beta 2A class IIa	2 out of 3	74.9492					43.5699	0.017	fold change	4.67	31.3792	0.0009	fold change	-2.27
NAAA	27163	N-acylethanolamine acid amidase	2 out of 3	74.9391					50.8099	0.0012	fold change	5.99	24.1292	0.0063	fold change	-1.94
BF432276	NA		2 out of 3	74.8544					14.4285	0.0125	fold change	-1.74	60.4259	0.001	fold change	-4.71
229994_at	NA		2 out of 3	74.8135					35.0877	0.0174	fold change	-3.5	39.7257	0.0249	fold change	2.77
SQSTM1	8878	sequestosome 1	2 out of 3	74.7382					15.9589	0.0417	fold change	1.86	58.7793	0.0002	fold change	-4.48
DNAJA4	55466	DnaJ (Hsp40) homolog, subfamily A, member 4	2 out of 3	74.7225					40.4181	0.0023	fold change	-4.15	34.3044	0.0234	fold change	2.44
UACA	55075	uveal autoantigen with coiled-coil domains and ankyrin repeats	2 out of 3	74.6735					38.9329	0.0101	fold change	3.96	35.7406	0.0008	fold change	2.53
AI963605	NA		2 out of 3	74.5648					46.1719	0.0094	fold change	5.07	28.393	0.0032	fold change	2.14
CRYL1	51084	crystallin, lambda 1	2 out of 3	74.4903					45.8791	0.0005	fold change	5.02	28.6112	0.0023	fold change	2.15
AW296451	NA		2 out of 3	74.4245					48.9289	0.0052	fold change	-5.59	25.4955	0.0014	fold change	2
DEPDC7	91614	DEP domain containing 7	2 out of 3	74.3352					51.9259	0.0014	fold change	6.25	22.4093	0.0254	fold change	1.86
CARHSP1	23589	calcium regulated heat stable protein 1, 24kDa	2 out of 3	74.2336					53.3225	0.0159	fold change	6.56	20.9111	0.0063	fold change	1.8
GAS1	2619	growth arrest-specific 1	2 out of 3	74.1268					53.6717	0.0003	fold change	-6.63	20.4552	0.0193	fold change	-1.78
FAM213A	84293	family with sequence similarity 213, member A	2 out of 3	74.1247					38.5907	0.0006	fold change	-3.91	35.5341	0.0122	fold change	-2.52
STK17A	9263	serine/threonine kinase 17a	2 out of 3	74.1219					28.9343	0.0042	fold change	-2.88	45.1875	0.0014	fold change	-3.15
TRPS1	7227	trichorhinophalangeal syndrome I	2 out of 3	74.1025					16.6688	0.0243	fold change	1.91	57.4336	0.0002	fold change	-4.29
241996_at	NA		2 out of 3	74.0851					49.7409	0.0004	fold change	5.74	24.3443	0.0328	fold change	-1.95
HSD17B6	8630	hydroxysteroid (17-beta) dehydrogenase 6 homolog (mouse)	2 out of 3	74.0734					51.6641	0.0004	fold change	-6.2	22.4093	0.0045	fold change	-1.86
LOC728342	728342	uncharacterized LOC728342	2 out of 3	74.0562					16.3801	0.0098	fold change	-1.89	57.6761	0.0251	fold change	4.33
PAK6	56924	p21 protein (Cdc42/Rac)-activated kinase 6	2 out of 3	74.0371					43.2934	0.0042	fold change	-4.63	30.7437	0.0129	fold change	-2.24
SLC12A2	6558	solute carrier family 12 (sodium/potassium/chloride transporters), member 2	2 out of 3	74.0261					14.9642	0.0033	fold change	-1.78	59.0619	0.0018	fold change	4.51
SLC25A45	283130	solute carrier family 25, member 45	2 out of 3	74.0215					57.4336	3.7e-05	fold change	7.88	16.5878	0.0033	fold change	1.6
SUN3	256979	Sad1 and UNC84 domain containing 3	2 out of 3	73.8473					23.2881	0.0004	fold change	2.42	50.5592	8.3e-05	fold change	-3.57
BC040884	NA		2 out of 3	73.8268					60.0716	0.0016	fold change	-8.85	13.7552	0.0026	fold change	-1.46
ACVR1C	130399	activin A receptor, type IC	2 out of 3	73.8076					60.6347	4.5e-05	fold change	-9.09	13.1729	0.023	fold change	-1.43
TUB	7275	tubby homolog (mouse)	2 out of 3	73.8038					14.4285	0.0113	fold change	1.74	59.3754	0.0001	fold change	-4.56
AA447317	NA		2 out of 3	73.7948					47.6763	0.0006	fold change	5.35	26.1185	0.0019	fold change	2.03
IRF8	3394	interferon regulatory factor 8	2 out of 3	73.7167					28.7114	0.0243	fold change	2.86	45.0053	0.0062	fold change	3.13
TTC9	23508	tetratricopeptide repeat domain 9	2 out of 3	73.7099					48.5998	0.0064	fold change	-5.52	25.1101	0.0031	fold change	1.98
ZXDB	158586	zinc finger, X-linked, duplicated B	2 out of 3	73.5061					46.7159	0.0038	fold change	-5.16	26.7903	0.0018	fold change	-2.06
N23258	NA		2 out of 3	73.4015					11.9175	0.0154	fold change	1.55	61.484	0.0011	fold change	4.82
OSBPL10	114884	oxysterol binding protein-like 10	2 out of 3	73.3704					16.2308	0.0162	fold change	1.88	57.1396	0.0096	fold change	4.25
NEO1	4756	neogenin 1	2 out of 3	73.3026					51.5554	0.0003	fold change	6.18	21.7472	0.0151	fold change	1.83
MBD1	4152	methyl-CpG binding domain protein 1	2 out of 3	73.2964					52.8413	0.0002	fold change	-6.43	20.4552	0.0015	fold change	-1.78
FBLN1	2192	fibulin 1	2 out of 3	73.1179					61.6378	0.0022	fold change	-9.6	11.4801	0.0081	fold change	-1.33
AK024805	NA		2 out of 3	73.033					50.024	0.0044	fold change	-5.78	23.009	0.0354	fold change	-1.89
1560814_a_at	NA		2 out of 3	72.9801					51.7513	9.8e-05	fold change	-6.21	21.2288	0.0129	fold change	-1.81
RILPL1	353116	Rab interacting lysosomal protein-like 1	2 out of 3	72.9799					29.7322	0.0091	fold change	-2.96	43.2477	0.0064	fold change	-2.99
CYBRD1	79901	cytochrome b reductase 1	2 out of 3	72.9061					52.6598	0.0022	fold change	6.42	20.2463	0.0349	fold change	-1.77
ZNF566	84924	zinc finger protein 566	2 out of 3	72.8642					27.8589	0.0044	fold change	-2.79	45.0053	0.0087	fold change	-3.13
SHC1	6464	SHC (Src homology 2 domain containing) transforming protein 1	2 out of 3	72.852					10.7464	0.0028	fold change	-1.46	62.1056	0.0003	fold change	-4.96
STX2	2054	syntaxin 2	2 out of 3	72.841					46.0507	0.0005	fold change	5.05	26.7903	0.0018	fold change	-2.06
ABHD2	11057	abhydrolase domain containing 2	2 out of 3	72.7932					16.9516	0.0135	fold change	1.93	55.8416	0.0018	fold change	4.11
MGAT4A	11320	mannosyl (alpha-1,3-)-glycoprotein beta-1,4-N-acetylglucosaminyltransferase, isozyme A	2 out of 3	72.7043					60.0716	0.0002	fold change	8.85	12.6327	0.0129	fold change	1.4
TNS4	84951	tensin 4	2 out of 3	72.6318					23.1914	0.0048	fold change	-2.41	49.4403	0.0079	fold change	3.5
KISS1R	84634	KISS1 receptor	2 out of 3	72.6226					9.3995	0.0265	fold change	1.35	63.2231	8e-05	fold change	5.16
ULK2	9706	unc-51-like kinase 2 (C. elegans)	2 out of 3	72.5741					19.4363	0.0221	fold change	-2.13	53.1378	0.0005	fold change	-3.82
GOLT1A	127845	golgi transport 1A	2 out of 3	72.497					37.2687	0.0014	fold change	3.76	35.2284	0.0016	fold change	2.5
LMTK2	22853	lemur tyrosine kinase 2	2 out of 3	72.4724					55.6898	9.4e-06	fold change	7.21	16.7826	0.0188	fold change	1.61
DENND2D	79961	DENN/MADD domain containing 2D	2 out of 3	72.323					25.9421	0.0024	fold change	-2.62	46.3809	0.0058	fold change	3.26
ADAMTSL4	54507	ADAMTS-like 4	2 out of 3	72.229					9.29712	0.0174	fold change	1.34	62.9319	0.0019	fold change	-5.11
NR2F2	7026	nuclear receptor subfamily 2, group F, member 2	2 out of 3	72.2106					49.8013	0.0004	fold change	-5.75	22.4093	0.0253	fold change	-1.86
SLC25A30	253512	solute carrier family 25, member 30	2 out of 3	72.1584					29.5109	0.0256	fold change	-2.94	42.6476	0.0036	fold change	-2.95
REEP6	92840	receptor accessory protein 6	2 out of 3	72.1569					23.6146	0.01	fold change	2.44	48.5423	0.0002	fold change	3.42
CAMK2D	817	calcium/calmodulin-dependent protein kinase II delta	2 out of 3	72.1023					33.1569	0.003	fold change	3.31	38.9454	0.0008	fold change	2.72
RNASET2	8635	ribonuclease T2	2 out of 3	72.0438					52.8413	0.0005	fold change	6.43	19.2025	0.0032	fold change	1.72
FAM160B1	57700	family with sequence similarity 160, member B1	2 out of 3	72.0402					18.5785	0.0078	fold change	-2.06	53.4616	0.0005	fold change	-3.86
C1S	716	complement component 1, s subcomponent	2 out of 3	72.024					45.5054	0.0082	fold change	-4.96	26.5186	0.0067	fold change	-2.05
AOX1	316	aldehyde oxidase 1	2 out of 3	71.9997					12.0448	0.0086	fold change	1.56	59.9549	0.0022	fold change	-4.64
INADL	10207	InaD-like (Drosophila)	2 out of 3	71.9759					33.3367	0.019	fold change	-3.33	38.6393	0.0069	fold change	2.7
LPGAT1	9926	lysophosphatidylglycerol acyltransferase 1	2 out of 3	71.8516					48.2188	0.0123	fold change	5.46	23.6328	0.019	fold change	1.92
SIRPA	140885	signal-regulatory protein alpha	2 out of 3	71.6502					12.0448	0.0191	fold change	1.56	59.6054	0.009	fold change	-4.59
LRRC66	339977	leucine rich repeat containing 66	2 out of 3	71.5362					55.4139	0.0006	fold change	7.13	16.1222	0.0012	fold change	1.58
C15orf40	123207	chromosome 15 open reading frame 40	2 out of 3	71.5335					27.0973	0.0002	fold change	-2.72	44.4361	0.0052	fold change	3.08
CELSR2	1952	cadherin, EGF LAG seven-pass G-type receptor 2 (flamingo homolog, Drosophila)	2 out of 3	71.4192					61.3001	0.0008	fold change	-9.38	10.1191	0.034	fold change	-1.22
ENC1	8507	ectodermal-neural cortex 1 (with BTB-like domain)	2 out of 3	71.4189					20.7557	0.0152	fold change	2.23	50.6632	0.0007	fold change	3.58
CIDEC	63924	cell death-inducing DFFA-like effector c	2 out of 3	71.3485					40.6048	0.0306	fold change	4.18	30.7437	0.0049	fold change	2.24
DDAH2	23564	dimethylarginine dimethylaminohydrolase 2	2 out of 3	71.3335					39.4577	0.0003	fold change	4.02	31.8758	0.0099	fold change	-2.3
IFI44	10561	interferon-induced protein 44	2 out of 3	71.2413					36.0129	0.0091	fold change	-3.6	35.2284	0.0063	fold change	-2.5
ITGB1	3688	integrin, beta 1 (fibronectin receptor, beta polypeptide, antigen CD29 includes MDF2, MSK12)	2 out of 3	71.2086					17.747	0.0067	fold change	1.99	53.4616	0.0005	fold change	-3.86
HMGA2	8091	high mobility group AT-hook 2	2 out of 3	71.2037					15.4884	0.004	fold change	1.82	55.7153	0.0001	fold change	-4.09
PBLD	64081	phenazine biosynthesis-like protein domain containing	2 out of 3	71.191					15.8519	0.0229	fold change	1.85	55.3391	0.0044	fold change	4.05
PLIN3	10226	perilipin 3	2 out of 3	71.1713					33.9254	0.0047	fold change	3.38	37.2459	0.0072	fold change	-2.61
SH3RF2	153769	SH3 domain containing ring finger 2	2 out of 3	71.1537					27.5221	0.0016	fold change	2.76	43.6315	0.0011	fold change	3.03
DIXDC1	85458	DIX domain containing 1	2 out of 3	71.0571					29.2651	0.0129	fold change	2.92	41.792	0.0032	fold change	-2.89
VAMP8	8673	vesicle-associated membrane protein 8 (endobrevin)	2 out of 3	71.0534					23.1914	0.0013	fold change	2.41	47.862	6.7e-05	fold change	3.37
DENND5B	160518	DENN/MADD domain containing 5B	2 out of 3	71.0505					52.5028	0.002	fold change	6.37	18.5476	0.0042	fold change	-1.69
CROT	54677	carnitine O-octanoyltransferase	2 out of 3	71.0359					47.1458	0.0007	fold change	-5.26	23.8901	0.0325	fold change	1.93
PDK3	5165	pyruvate dehydrogenase kinase, isozyme 3	2 out of 3	70.8977					54.5286	0.0011	fold change	-6.88	16.3691	0.0048	fold change	-1.59
PCBD1	5092	pterin-4 alpha-carbinolamine dehydratase/dimerization cofactor of hepatocyte nuclear factor 1 alpha	2 out of 3	70.8873					40.4181	0.008	fold change	4.15	30.4692	0.0028	fold change	2.23
NNMT	4837	nicotinamide N-methyltransferase	2 out of 3	70.8699					10.2653	0.019	fold change	-1.42	60.6046	0.0106	fold change	-4.73
GNAL	2774	guanine nucleotide binding protein (G protein), alpha activating activity polypeptide, olfactory type	2 out of 3	70.8458					15.3568	0.0055	fold change	1.81	55.489	0.0438	fold change	-4.07
SEMA3A	10371	sema domain, immunoglobulin domain (Ig), short basic domain, secreted, (semaphorin) 3A	2 out of 3	70.804					46.1719	0.0184	fold change	-5.07	24.6321	0.0175	fold change	1.96
C16orf45	89927	chromosome 16 open reading frame 45	2 out of 3	70.7418					59.9549	0.0011	fold change	8.84	10.7869	0.0468	fold change	-1.28
MYBL1	4603	v-myb myeloblastosis viral oncogene homolog (avian)-like 1	2 out of 3	70.6964					11.0042	0.0038	fold change	1.48	59.6922	0.0003	fold change	-4.6
CYP3A7	1551	cytochrome P450, family 3, subfamily A, polypeptide 7	2 out of 3	70.666					53.8834	0.0035	fold change	6.71	16.7826	0.0333	fold change	1.61
ARPC1A	10552	actin related protein 2/3 complex, subunit 1A, 41kDa	2 out of 3	70.5932					57.7841	0.0012	fold change	8.03	12.8091	0.0078	fold change	1.41
ZNF559	84527	zinc finger protein 559	2 out of 3	70.5855					54.2164	0.014	fold change	-6.77	16.3691	0.0253	fold change	-1.59
EOGT	285203	EGF domain-specific O-linked N-acetylglucosamine (GlcNAc) transferase	2 out of 3	70.5475					35.6888	0.0199	fold change	-3.57	34.8588	0.0103	fold change	-2.48
MR1	3140	major histocompatibility complex, class I-related	2 out of 3	70.5417					52.8636	4.7e-07	fold change	-6.45	17.6781	0.005	fold change	-1.65
CPEB2	132864	cytoplasmic polyadenylation element binding protein 2	2 out of 3	70.5193					33.2734	0.0024	fold change	3.32	37.2459	0.0058	fold change	-2.61
SSPN	8082	sarcospan	2 out of 3	70.4831					57.4871	7.4e-05	fold change	-7.89	12.996	0.0199	fold change	1.42
CCDC71L	168455	coiled-coil domain containing 71-like	2 out of 3	70.4826					23.1914	0.003	fold change	2.41	47.2912	0.0013	fold change	-3.32
IL32	9235	interleukin 32	2 out of 3	70.4664					38.5907	0.0291	fold change	3.91	31.8758	0.0004	fold change	-2.3
LOC100506054	100506054	uncharacterized LOC100506054	2 out of 3	70.4477					44.5165	0.0013	fold change	4.81	25.9312	0.0319	fold change	2.02
SYDE1	85360	synapse defective 1, Rho GTPase, homolog 1 (C. elegans)	2 out of 3	70.4099					12.7072	0.0323	fold change	1.61	57.7027	0.0006	fold change	-4.34
NHS	4810	Nance-Horan syndrome (congenital cataracts and dental anomalies)	2 out of 3	70.2908					50.873	0.0028	fold change	-6.02	19.4179	0.0212	fold change	1.73
AFAP1L1	134265	actin filament associated protein 1-like 1	2 out of 3	70.2278					57.5951	2.8e-05	fold change	-7.93	12.6327	0.0318	fold change	-1.4
KRCC1	51315	lysine-rich coiled-coil 1	2 out of 3	70.2072					28.7114	0.0082	fold change	2.86	41.4958	0.0066	fold change	2.87
FRMD3	257019	FERM domain containing 3	2 out of 3	70.2072					44.276	0.0039	fold change	4.75	25.9312	0.0057	fold change	2.02
SLC22A15	55356	solute carrier family 22, member 15	2 out of 3	70.1855					50.7676	0.0031	fold change	-5.98	19.4179	0.017	fold change	-1.73
CEP19	84984	centrosomal protein 19kDa	2 out of 3	70.1552					36.0129	0.0168	fold change	3.6	34.1423	0.0464	fold change	-2.43
ZNF600	162966	zinc finger protein 600	2 out of 3	70.1087					26.2749	0.0018	fold change	-2.65	43.8339	0.0029	fold change	3.04
237183_at	NA		2 out of 3	70.1047					25.4586	0.0012	fold change	2.59	44.646	0.0139	fold change	3.1
NPAS2	4862	neuronal PAS domain protein 2	2 out of 3	70.096					27.5221	0.0013	fold change	2.76	42.5738	0.0055	fold change	-2.94
AW243154	NA		2 out of 3	70.0563					37.0774	0.0009	fold change	-3.73	32.9789	0.0287	fold change	-2.36
BCCIP	56647	BRCA2 and CDKN1A interacting protein	2 out of 3	70.0435					25.9421	0.0258	fold change	2.62	44.1014	5.6e-05	fold change	3.06
PLCE1	51196	phospholipase C, epsilon 1	2 out of 3	70.0335					12.7072	0.02	fold change	-1.61	57.3263	9.3e-05	fold change	4.28
TMEM133	83935	transmembrane protein 133	2 out of 3	70.0142					30.8206	0.0018	fold change	3.08	39.1936	0.0046	fold change	2.74
AGAP1	116987	ArfGAP with GTPase domain, ankyrin repeat and PH domain 1	2 out of 3	69.9957					43.4771	0.0011	fold change	4.66	26.5186	0.0049	fold change	2.05
FAM101A	144347	family with sequence similarity 101, member A	2 out of 3	69.9774					55.4637	0.0232	fold change	7.14	14.5137	0.0186	fold change	1.5
DDAH1	23576	dimethylarginine dimethylaminohydrolase 1	2 out of 3	69.9606					24.3201	0.0001	fold change	2.49	45.6404	0.0005	fold change	3.2
W19283	NA		2 out of 3	69.9197					47.5105	0.0008	fold change	5.31	22.4093	0.0022	fold change	-1.86
CDK6	1021	cyclin-dependent kinase 6	2 out of 3	69.8886					45.7595	4.5e-06	fold change	-5	24.1292	0.0071	fold change	-1.94
AA569225	NA		2 out of 3	69.7379					39.2687	0.0007	fold change	-4	30.4692	0.0031	fold change	-2.23
IER5L	389792	immediate early response 5-like	2 out of 3	69.7068					25.7789	0.0157	fold change	-2.61	43.9279	0.0122	fold change	-3.05
ANXA1	301	annexin A1	2 out of 3	69.529					20.7557	0.0001	fold change	-2.23	48.7734	0.0004	fold change	-3.44
244023_at	NA		2 out of 3	69.4949					29.6534	0.0244	fold change	-2.95	39.8416	0.0008	fold change	2.78
SHC3	53358	SHC (Src homology 2 domain containing) transforming protein 3	2 out of 3	69.4728					51.7947	0.0019	fold change	-6.23	17.6781	0.0054	fold change	-1.65
TASP1	55617	taspase, threonine aspartase, 1	2 out of 3	69.4532					37.2687	0.0009	fold change	-3.76	32.1846	0.0039	fold change	2.32
MTUS1	57509	microtubule associated tumor suppressor 1	2 out of 3	69.3765					31.0385	0.003	fold change	3.1	38.338	0.0007	fold change	2.68
PRSS12	8492	protease, serine, 12 (neurotrypsin, motopsin)	2 out of 3	69.3464					12.7072	0.015	fold change	-1.61	56.6393	0.0003	fold change	4.18
ANK2	287	ankyrin 2, neuronal	2 out of 3	69.3197					10.8757	0.0159	fold change	1.47	58.444	0.0004	fold change	-4.42
CCK	885	cholecystokinin	2 out of 3	69.2995					49.5	0.0044	fold change	-5.68	19.7995	0.0251	fold change	1.75
LSR	51599	lipolysis stimulated lipoprotein receptor	2 out of 3	69.2596					13.7706	0.0438	fold change	-1.69	55.489	0.007	fold change	4.07
SH2D3A	10045	SH2 domain containing 3A	2 out of 3	69.1457					18.8145	0.0448	fold change	-2.08	50.3312	0.0116	fold change	3.55
TANC2	26115	tetratricopeptide repeat, ankyrin repeat and coiled-coil containing 2	2 out of 3	69.1351					33.601	0.03	fold change	-3.35	35.5341	0.0056	fold change	-2.52
OPTN	10133	optineurin	2 out of 3	68.9416					46.3637	0.001	fold change	5.11	22.578	0.0389	fold change	-1.87
RIOK3	8780	RIO kinase 3 (yeast)	2 out of 3	68.9299					14.7135	5.2e-05	fold change	1.76	54.2164	0.0012	fold change	3.95
RAPGEFL1	51195	Rap guanine nucleotide exchange factor (GEF)-like 1	2 out of 3	68.9091					21.047	0.0038	fold change	-2.25	47.862	0.0089	fold change	3.37
XDH	7498	xanthine dehydrogenase	2 out of 3	68.8975					54.3839	0.0008	fold change	-6.83	14.5137	0.0245	fold change	1.5
SPTLC2	9517	serine palmitoyltransferase, long chain base subunit 2	2 out of 3	68.8952					27.3994	0.0004	fold change	2.75	41.4958	0.0021	fold change	2.87
ABHD11	83451	abhydrolase domain containing 11	2 out of 3	68.7679					25.9421	0.0032	fold change	2.62	42.8258	0.0002	fold change	2.96
SLC27A3	11000	solute carrier family 27 (fatty acid transporter), member 3	2 out of 3	68.7486					14.8414	0.0496	fold change	-1.77	53.9072	0.0035	fold change	3.91
HMHA1	23526	histocompatibility (minor) HA-1	2 out of 3	68.7345					42.3977	0.0017	fold change	4.47	26.3369	0.0026	fold change	-2.04
GNAI1	2770	guanine nucleotide binding protein (G protein), alpha inhibiting activity polypeptide 1	2 out of 3	68.6495					45.6404	1.4e-05	fold change	4.99	23.009	0.0087	fold change	-1.89
AI819863	NA		2 out of 3	68.6337					56.5093	0.0002	fold change	7.57	12.1244	0.0283	fold change	1.37
SYT17	51760	synaptotagmin XVII	2 out of 3	68.6066					51.1692	0.0385	fold change	6.08	17.4373	0.0146	fold change	1.64
RFXAP	5994	regulatory factor X-associated protein	2 out of 3	68.6058					46.8586	0.0296	fold change	-5.19	21.7472	0.0465	fold change	-1.83
DISP2	85455	dispatched homolog 2 (Drosophila)	2 out of 3	68.6018					33.0677	0.0081	fold change	3.3	35.5341	0.0065	fold change	-2.52
AI633559	NA		2 out of 3	68.5615					43.066	0.0136	fold change	-4.6	25.4955	0.0486	fold change	-2
CPD	1362	carboxypeptidase D	2 out of 3	68.5389					10.6183	0.0425	fold change	1.45	57.9206	0.0005	fold change	4.37
C19orf21	126353	chromosome 19 open reading frame 21	2 out of 3	68.5346					25.6338	0.0003	fold change	2.6	42.9008	0.0017	fold change	2.97
CHMP2B	25978	charged multivesicular body protein 2B	2 out of 3	68.5157					30.439	0.0097	fold change	3.04	38.0767	0.0007	fold change	2.66
BM664532	NA		2 out of 3	68.4388					34.0289	0.0156	fold change	-3.39	34.4099	0.0093	fold change	-2.45
AF318340	NA		2 out of 3	68.4371					28.7114	0.0212	fold change	-2.86	39.7257	0.0147	fold change	2.77
LRRC8B	23507	leucine rich repeat containing 8 family, member B	2 out of 3	68.4078					36.4076	0.0185	fold change	-3.64	32.0002	0.0043	fold change	2.31
AA653638	NA		2 out of 3	68.364					33.7116	0.0034	fold change	-3.36	34.6524	0.0254	fold change	2.46
USP31	57478	ubiquitin specific peptidase 31	2 out of 3	68.3637					56.0966	0.0001	fold change	-7.42	12.2671	0.0343	fold change	-1.38
EPB41L4B	54566	erythrocyte membrane protein band 4.1 like 4B	2 out of 3	68.3541					28.9343	0.0008	fold change	2.88	39.4197	0.0079	fold change	2.75
MPZL3	196264	myelin protein zero-like 3	2 out of 3	68.3532					26.2749	0.0146	fold change	-2.65	42.0783	0.0025	fold change	2.91
SLC20A1	6574	solute carrier family 20 (phosphate transporter), member 1	2 out of 3	68.3422					32.4137	0.0025	fold change	3.23	35.9286	0.0002	fold change	-2.54
ZNF264	9422	zinc finger protein 264	2 out of 3	68.2661					57.2194	0.005	fold change	-7.79	11.0467	0.0154	fold change	1.3
ADA	100	adenosine deaminase	2 out of 3	68.2531					19.305	0.0481	fold change	-2.12	48.9481	0.0057	fold change	-3.46
C1orf116	79098	chromosome 1 open reading frame 116	2 out of 3	68.2341					24.6025	0.0327	fold change	-2.52	43.6315	0.0062	fold change	3.03
VEZT	55591	vezatin, adherens junctions transmembrane protein	2 out of 3	68.1723					31.3393	0.0011	fold change	3.13	36.833	0.0084	fold change	-2.59
HECTD2	143279	HECT domain containing E3 ubiquitin protein ligase 2	2 out of 3	68.1383					22.2591	0.0014	fold change	-2.34	45.8791	0.0107	fold change	-3.22
MYO7B	4648	myosin VIIB	2 out of 3	68.0661					34.9182	4.2e-05	fold change	3.48	33.1479	0.0145	fold change	2.37
228562_at	NA		2 out of 3	68.0375					36.5374	0.0011	fold change	-3.66	31.5	0.0065	fold change	-2.28
SIK1	150094	salt-inducible kinase 1	2 out of 3	68.0347					27.9985	0.0199	fold change	-2.8	40.0362	0.0059	fold change	-2.79
C11orf75	56935	chromosome 11 open reading frame 75	2 out of 3	68.0069					23.747	0.0482	fold change	2.45	44.2599	0.0001	fold change	3.07
ETS2	2114	v-ets erythroblastosis virus E26 oncogene homolog 2 (avian)	2 out of 3	67.9507					15.9589	0.0121	fold change	-1.86	51.9918	0.0057	fold change	3.73
PPP2R3A	5523	protein phosphatase 2, regulatory subunit B'', alpha	2 out of 3	67.9492					40.78	0.0007	fold change	-4.2	27.1692	0.0011	fold change	-2.08
LINC00467	84791	long intergenic non-protein coding RNA 467	2 out of 3	67.9167					36.5374	0.0001	fold change	3.66	31.3792	0.0151	fold change	2.27
CCDC58	131076	coiled-coil domain containing 58	2 out of 3	67.9045					32.8468	0.0015	fold change	-3.28	35.0577	0.0134	fold change	2.49
PCGF6	84108	polycomb group ring finger 6	2 out of 3	67.8794					48.677	0.0005	fold change	5.53	19.2025	0.0055	fold change	-1.72
FOXA3	3171	forkhead box A3	2 out of 3	67.8028					12.3138	0.003	fold change	1.58	55.489	0.0029	fold change	4.07
MX1	4599	myxovirus (influenza virus) resistance 1, interferon-inducible protein p78 (mouse)	2 out of 3	67.8001					16.0927	0.0176	fold change	1.87	51.7074	0.0002	fold change	-3.68
LOC100506098	100506098	uncharacterized LOC100506098	2 out of 3	67.7889					20.094	0.0026	fold change	-2.18	47.6949	0.0014	fold change	3.35
ARHGAP27	201176	Rho GTPase activating protein 27	2 out of 3	67.7509					27.3994	0.0021	fold change	2.75	40.3515	0.0058	fold change	2.81
CLCN4	1183	chloride channel, voltage-sensitive 4	2 out of 3	67.7203					34.2564	0.0026	fold change	-3.42	33.4638	0.0093	fold change	-2.39
S100A9	6280	S100 calcium binding protein A9	2 out of 3	67.7147					51.1268	0.0012	fold change	-6.07	16.5878	0.0224	fold change	-1.6
CNGA1	1259	cyclic nucleotide gated channel alpha 1	2 out of 3	67.6435					55.8416	0.0428	fold change	7.25	11.8019	0.0381	fold change	1.35
RAD51C	5889	RAD51 homolog C (S. cerevisiae)	2 out of 3	67.6359					11.5393	0.0058	fold change	-1.52	56.0966	0.0016	fold change	-4.14
PARP11	57097	poly (ADP-ribose) polymerase family, member 11	2 out of 3	67.5568					52.0801	0.0034	fold change	-6.28	15.4767	0.0183	fold change	-1.55
CHSY1	22856	chondroitin sulfate synthase 1	2 out of 3	67.3377					54.5286	0.0266	fold change	-6.88	12.8091	0.022	fold change	1.41
DAB2	1601	disabled homolog 2, mitogen-responsive phosphoprotein (Drosophila)	2 out of 3	67.2611					19.97	0.0039	fold change	2.17	47.2912	0.0068	fold change	-3.32
ETFB	2109	electron-transfer-flavoprotein, beta polypeptide	2 out of 3	67.1988					14.9642	7.3e-05	fold change	1.78	52.2346	0.0009	fold change	3.75
HMGB3	3149	high mobility group box 3	2 out of 3	67.1872					46.2762	0.0003	fold change	-5.09	20.9111	0.0017	fold change	1.8
KSR1	8844	kinase suppressor of ras 1	2 out of 3	67.158					23.0566	0.0012	fold change	2.4	44.1014	0.0048	fold change	-3.06
AGMAT	79814	agmatine ureohydrolase (agmatinase)	2 out of 3	67.1375					12.8493	0.0169	fold change	1.62	54.2882	0.0108	fold change	3.96
APOLD1	81575	apolipoprotein L domain containing 1	2 out of 3	67.1349					45.3877	0.0021	fold change	-4.94	21.7472	0.0013	fold change	-1.83
ZEB1-AS1	220930	ZEB1 antisense RNA 1	2 out of 3	67.0941					47.6763	0.0264	fold change	5.35	19.4179	0.0081	fold change	-1.73
DTX4	23220	deltex homolog 4 (Drosophila)	2 out of 3	67.0722					20.9003	0.0184	fold change	-2.24	46.1719	0.0065	fold change	3.24
FASN	2194	fatty acid synthase	2 out of 3	66.9313					31.703	0.0175	fold change	-3.16	35.2284	0.0252	fold change	-2.5
CXCL16	58191	chemokine (C-X-C motif) ligand 16	2 out of 3	66.9114					19.1427	0.0112	fold change	2.11	47.7687	0.0009	fold change	3.36
CD55	1604	CD55 molecule, decay accelerating factor for complement (Cromer blood group)	2 out of 3	66.8249					54.3839	0.0029	fold change	6.83	12.441	0.0039	fold change	1.39
ELFN2	114794	extracellular leucine-rich repeat and fibronectin type III domain containing 2	2 out of 3	66.7779					44.825	0.0004	fold change	4.86	21.9529	0.0101	fold change	1.84
229147_at	NA		2 out of 3	66.7528					22.919	0.0027	fold change	-2.39	43.8339	0.0117	fold change	3.04
AI127295	NA		2 out of 3	66.751					31.8922	0.0409	fold change	3.18	34.8588	0.0013	fold change	2.48
216568_x_at	NA		2 out of 3	66.7392					42.107	0.0078	fold change	4.42	24.6321	0.0072	fold change	1.96
ATP5S	27109	ATP synthase, H+ transporting, mitochondrial Fo complex, subunit s (factor B)	2 out of 3	66.7315					24.1576	0.0012	fold change	-2.48	42.5738	0.0062	fold change	2.94
229163_at	NA		2 out of 3	66.7091					23.4614	0.0259	fold change	2.43	43.2477	0.0001	fold change	2.99
C20orf194	25943	chromosome 20 open reading frame 194	2 out of 3	66.6903					51.3832	2e-05	fold change	-6.14	15.3071	0.0004	fold change	-1.54
BDH1	622	3-hydroxybutyrate dehydrogenase, type 1	2 out of 3	66.6811					28.6044	0.0189	fold change	2.85	38.0767	0.0026	fold change	2.66
C1orf226	400793	chromosome 1 open reading frame 226	2 out of 3	66.61					52.5028	0.0076	fold change	6.37	14.1072	0.0193	fold change	1.48
215743_at	NA		2 out of 3	66.6068					18.007	0.0109	fold change	2.01	48.5998	0.0023	fold change	-3.43
IFT74	80173	intraflagellar transport 74 homolog (Chlamydomonas)	2 out of 3	66.5723					53.1841	0.0335	fold change	-6.55	13.3881	0.0304	fold change	1.44
CPA4	51200	carboxypeptidase A4	2 out of 3	66.5568					54.4324	0.0002	fold change	-6.84	12.1244	0.0141	fold change	-1.37
BC030757	NA		2 out of 3	66.5548					46.9479	0.0183	fold change	-5.22	19.6068	0.034	fold change	-1.74
NR3C2	4306	nuclear receptor subfamily 3, group C, member 2	2 out of 3	66.5104					45.8106	0.0006	fold change	5.01	20.6997	0.0105	fold change	1.79
WWOX	51741	WW domain containing oxidoreductase	2 out of 3	66.4846					56.1476	7.5e-05	fold change	-7.43	10.337	0.0217	fold change	-1.24
HMGN5	79366	high mobility group nucleosome binding domain 5	2 out of 3	66.4405					18.5785	0.0011	fold change	-2.06	47.862	0.0003	fold change	-3.37
ZNF211	10520	zinc finger protein 211	2 out of 3	66.4216					56.3025	0.0004	fold change	-7.5	10.1191	0.0289	fold change	-1.22
PDE4DIP	9659	phosphodiesterase 4D interacting protein	2 out of 3	66.4174					10.1408	0.0313	fold change	1.41	56.2765	0.006	fold change	4.15
ARHGEF28	64283	Rho guanine nucleotide exchange factor (GEF) 28	2 out of 3	66.3843					28.7853	0.0153	fold change	2.87	37.5991	0.0011	fold change	-2.63
CRYZ	1429	crystallin, zeta (quinone reductase)	2 out of 3	66.3668					34.6719	0.001	fold change	3.46	31.6949	0.002	fold change	2.29
CABYR	26256	calcium binding tyrosine-(Y)-phosphorylation regulated	2 out of 3	66.3374					23.9692	0.0038	fold change	2.47	42.3682	0.0003	fold change	-2.93
PAX6	5080	paired box 6	2 out of 3	66.3226					11.794	0.0121	fold change	1.54	54.5286	0.0086	fold change	-3.98
TBC1D2	55357	TBC1 domain family, member 2	2 out of 3	66.3169					37.9239	0.0048	fold change	-3.84	28.393	0.0014	fold change	-2.14
MEST	4232	mesoderm specific transcript homolog (mouse)	2 out of 3	66.3064					45.6067	0.0141	fold change	-4.98	20.6997	0.0055	fold change	1.79
T89693	NA		2 out of 3	66.2836					45.0548	0.0003	fold change	-4.89	21.2288	0.0046	fold change	1.81
C18orf1	753	chromosome 18 open reading frame 1	2 out of 3	66.2795					55.8416	0.0231	fold change	7.25	10.4379	0.046	fold change	-1.25
NEU1	4758	sialidase 1 (lysosomal sialidase)	2 out of 3	66.2474					53.4382	0.0007	fold change	-6.59	12.8091	0.0096	fold change	-1.41
RHBDL2	54933	rhomboid, veinlet-like 2 (Drosophila)	2 out of 3	66.2227					12.5746	0.0216	fold change	-1.6	53.6481	0.0016	fold change	3.89
TP53I11	9537	tumor protein p53 inducible protein 11	2 out of 3	66.221					12.3138	0.0051	fold change	-1.58	53.9072	0.002	fold change	3.91
AA594609	NA		2 out of 3	66.1139					23.2881	0.0263	fold change	-2.42	42.8258	0.0186	fold change	2.96
AI191905	NA		2 out of 3	66.0511					34.6719	0.002	fold change	-3.46	31.3792	0.0021	fold change	2.27
SERINC2	347735	serine incorporator 2	2 out of 3	66.0352					23.4614	0.0227	fold change	-2.43	42.5738	0.0039	fold change	2.94
PLXNA2	5362	plexin A2	2 out of 3	66.0341					35.7301	0.0161	fold change	-3.58	30.3039	0.0082	fold change	2.22
LMCD1	29995	LIM and cysteine-rich domains 1	2 out of 3	66.0329					38.5907	0.0006	fold change	3.91	27.4422	0.0016	fold change	2.09
SLC39A4	55630	solute carrier family 39 (zinc transporter), member 4	2 out of 3	66.032					33.4638	0.0008	fold change	3.34	32.5682	0.0006	fold change	2.34
IL28RA	163702	interleukin 28 receptor, alpha (interferon, lambda receptor)	2 out of 3	65.9896					46.7871	0.0036	fold change	5.18	19.2025	0.022	fold change	1.72
RTKN	6242	rhotekin	2 out of 3	65.9313					32.9524	0.0034	fold change	3.29	32.9789	0.0277	fold change	2.36
SNRPA1	6627	small nuclear ribonucleoprotein polypeptide A'	2 out of 3	65.8969					48.2188	0.0162	fold change	-5.46	17.6781	0.0045	fold change	1.65
ETFA	2108	electron-transfer-flavoprotein, alpha polypeptide	2 out of 3	65.8363					20.094	0.0244	fold change	-2.18	45.7423	6.2e-05	fold change	3.21
ICA1	3382	islet cell autoantigen 1, 69kDa	2 out of 3	65.8299					32.2013	2.2e-05	fold change	-3.21	33.6286	0.0002	fold change	2.4
TPCN1	53373	two pore segment channel 1	2 out of 3	65.7796					44.276	0.0113	fold change	4.75	21.5036	0.0045	fold change	-1.82
RASA3	22821	RAS p21 protein activator 3	2 out of 3	65.7796					26.6856	0.0002	fold change	2.68	39.094	0.0008	fold change	-2.73
AGK	55750	acylglycerol kinase	2 out of 3	65.7683					54.2882	0.0148	fold change	-6.82	11.4801	0.0155	fold change	1.33
BE672557	NA		2 out of 3	65.7129					28.217	0.0046	fold change	2.82	37.4959	0.0018	fold change	2.62
AA480677	NA		2 out of 3	65.6748					40.5647	0.0127	fold change	4.17	25.1101	0.0124	fold change	1.98
FUT4	2526	fucosyltransferase 4 (alpha (1,3) fucosyltransferase, myeloid-specific)	2 out of 3	65.5549					36.9437	0.04	fold change	-3.71	28.6112	0.0018	fold change	2.15
210387_at	NA		2 out of 3	65.537					40.246	0.0004	fold change	4.12	25.291	0.009	fold change	-1.99
RBM41	55285	RNA binding motif protein 41	2 out of 3	65.4578					27.5221	0.0142	fold change	2.76	37.9357	0.0062	fold change	2.65
FCF1	51077	FCF1 small subunit (SSU) processome component homolog (S. cerevisiae)	2 out of 3	65.41					43.6628	0.0056	fold change	-4.68	21.7472	0.0081	fold change	1.83
SGSH	6448	N-sulfoglucosamine sulfohydrolase	2 out of 3	65.3147					36.14	0.0008	fold change	3.61	29.1748	0.0074	fold change	-2.17
IL7R	3575	interleukin 7 receptor	2 out of 3	65.2367					43.066	0.0234	fold change	-4.6	22.1708	0.0157	fold change	-1.85
HSD17B11	51170	hydroxysteroid (17-beta) dehydrogenase 11	2 out of 3	65.1918					51.0845	0.0007	fold change	6.06	14.1072	0.0069	fold change	1.48
CEP89	84902	centrosomal protein 89kDa	2 out of 3	65.1594					40.0493	0.0082	fold change	-4.09	25.1101	0.037	fold change	-1.98
TMTC3	160418	transmembrane and tetratricopeptide repeat containing 3	2 out of 3	65.1292					41.9203	0.0001	fold change	-4.39	23.209	0.0056	fold change	-1.9
VPS4B	9525	vacuolar protein sorting 4 homolog B (S. cerevisiae)	2 out of 3	65.1124					31.4838	0.0057	fold change	-3.14	33.6286	0.0027	fold change	2.4
AP5M1	55745	adaptor-related protein complex 5, mu 1 subunit	2 out of 3	65.1084					26.9017	0.0128	fold change	-2.7	38.2067	0.0023	fold change	2.67
SCARB1	949	scavenger receptor class B, member 1	2 out of 3	65.0748					25.0386	6.7e-05	fold change	2.55	40.0362	0.0109	fold change	-2.79
PLA2G10	8399	phospholipase A2, group X	2 out of 3	65.0699					16.5276	0.0146	fold change	-1.9	48.5423	0.0022	fold change	3.42
KIAA1244	57221	KIAA1244	2 out of 3	65.0645					37.6223	0.0036	fold change	-3.8	27.4422	0.0268	fold change	2.09
DDIT4	54541	DNA-damage-inducible transcript 4	2 out of 3	64.9803					33.601	0.0086	fold change	-3.35	31.3792	0.0011	fold change	-2.27
PCDHA@	56117	protocadherin alpha cluster, complex locus	2 out of 3	64.8781					40.246	0.0004	fold change	-4.12	24.6321	0.0018	fold change	-1.96
213652_at	NA		2 out of 3	64.8777					46.5567	0.0026	fold change	5.14	18.321	0.0304	fold change	1.68
NFE2L3	9603	nuclear factor (erythroid-derived 2)-like 3	2 out of 3	64.8751					44.42	0.0035	fold change	-4.79	20.4552	0.013	fold change	-1.78
NFATC2	4773	nuclear factor of activated T-cells, cytoplasmic, calcineurin-dependent 2	2 out of 3	64.8254					53.6481	0.0033	fold change	6.62	11.1773	0.0342	fold change	1.31
ARNTL2	56938	aryl hydrocarbon receptor nuclear translocator-like 2	2 out of 3	64.7933					51.6204	0.0003	fold change	-6.19	13.1729	0.0264	fold change	-1.43
MAOA	4128	monoamine oxidase A	2 out of 3	64.7259					11.794	0.0402	fold change	1.54	52.9319	0.0001	fold change	3.8
LETM2	137994	leucine zipper-EF-hand containing transmembrane protein 2	2 out of 3	64.7133					27.2174	0.004	fold change	-2.73	37.4959	0.0004	fold change	-2.62
MEF2A	4205	myocyte enhancer factor 2A	2 out of 3	64.6362					25.0386	0.0252	fold change	-2.55	39.5977	0.0216	fold change	2.76
PROC	5624	protein C (inactivator of coagulation factors Va and VIIIa)	2 out of 3	64.6244					44.825	0.0024	fold change	4.86	19.7995	0.0201	fold change	1.75
IGF1R	3480	insulin-like growth factor 1 receptor	2 out of 3	64.5932					27.0973	0.0015	fold change	-2.72	37.4959	0.0011	fold change	2.62
ZNF226	7769	zinc finger protein 226	2 out of 3	64.5585					53.6481	0.0004	fold change	-6.62	10.9104	0.0465	fold change	1.29
CYB5R2	51700	cytochrome b5 reductase 2	2 out of 3	64.4929					46.1719	0.0002	fold change	5.07	18.321	0.0061	fold change	-1.68
LIF	3976	leukemia inhibitory factor	2 out of 3	64.4174					36.6027	0.0009	fold change	3.67	27.8147	0.0038	fold change	-2.11
C20orf118	140711	chromosome 20 open reading frame 118	2 out of 3	64.382					38.7	0.002	fold change	3.92	25.682	0.0011	fold change	2.01
FAM114A1	92689	family with sequence similarity 114, member A1	2 out of 3	64.3092					34.9182	0.0006	fold change	3.48	29.391	0.0313	fold change	-2.18
DGKA	1606	diacylglycerol kinase, alpha 80kDa	2 out of 3	64.2936					25.3483	0.0118	fold change	-2.58	38.9454	0.0017	fold change	2.72
MSI2	124540	musashi homolog 2 (Drosophila)	2 out of 3	64.293					18.1211	0.0258	fold change	2.02	46.1719	0.008	fold change	3.24
S100A3	6274	S100 calcium binding protein A3	2 out of 3	64.2854					20.9003	0.0186	fold change	-2.24	43.3851	0.0046	fold change	-3
OVOL1	5017	ovo-like 1(Drosophila)	2 out of 3	64.2731					25.6338	0.0332	fold change	-2.6	38.6393	0.0028	fold change	2.7
RND3	390	Rho family GTPase 3	2 out of 3	64.2529					44.646	0.0002	fold change	-4.83	19.6068	0.0137	fold change	-1.74
235227_at	NA		2 out of 3	64.1476					26.9017	0.0023	fold change	-2.7	37.2459	0.0135	fold change	-2.61
SPINT2	10653	serine peptidase inhibitor, Kunitz type, 2	2 out of 3	64.1421					11.1187	0.0245	fold change	-1.49	53.0234	0.0006	fold change	3.81
ENDOD1	23052	endonuclease domain containing 1	2 out of 3	64.0784					20.6164	0.0442	fold change	2.22	43.462	0.0013	fold change	3.01
IRAK1BP1	134728	interleukin-1 receptor-associated kinase 1 binding protein 1	2 out of 3	63.991					38.7	0.0003	fold change	-3.92	25.291	0.0332	fold change	-1.99
TSSC1	7260	tumor suppressing subtransferable candidate 1	2 out of 3	63.9816					38.8715	6.4e-05	fold change	3.95	25.1101	0.0002	fold change	1.98
229794_at	NA		2 out of 3	63.9315					26.6856	0.0052	fold change	-2.68	37.2459	0.0164	fold change	-2.61
1558111_at	NA		2 out of 3	63.9009					28.3669	0.0104	fold change	-2.83	35.5341	0.0073	fold change	2.52
AW296028	NA		2 out of 3	63.848					12.3138	0.0125	fold change	-1.58	51.5342	0.0023	fold change	3.67
NUBPL	80224	nucleotide binding protein-like	2 out of 3	63.8152					19.7138	0.0044	fold change	-2.15	44.1014	0.0069	fold change	3.06
ACBD5	91452	acyl-CoA binding domain containing 5	2 out of 3	63.7969					45.8791	0.001	fold change	5.02	17.9177	0.0108	fold change	-1.66
222824_at	NA		2 out of 3	63.7906					27.3507	0.0014	fold change	2.74	36.44	0.0009	fold change	2.57
BTF3L4	91408	basic transcription factor 3-like 4	2 out of 3	63.7836					44.5812	0.0003	fold change	-4.82	19.2025	0.0006	fold change	-1.72
TMED10	10972	transmembrane emp24-like trafficking protein 10 (yeast)	2 out of 3	63.7691					28.7114	0.0119	fold change	-2.86	35.0577	0.003	fold change	2.49
ARHGAP26	23092	Rho GTPase activating protein 26	2 out of 3	63.7444					29.0919	0.0017	fold change	2.9	34.6524	0.034	fold change	2.46
TMEM55A	55529	transmembrane protein 55A	2 out of 3	63.7352					45.1875	0.0006	fold change	4.91	18.5476	0.019	fold change	-1.69
236007_at	NA		2 out of 3	63.7069					35.5545	0.013	fold change	-3.55	28.1524	0.0236	fold change	-2.13
C9orf91	203197	chromosome 9 open reading frame 91	2 out of 3	63.634					17.8916	0.0427	fold change	-2	45.7423	0.0046	fold change	-3.21
ATRN	8455	attractin	2 out of 3	63.6083					32.6635	0.0011	fold change	-3.26	30.9448	0.0028	fold change	-2.25
HOTTIP	100316868	HOXA distal transcript antisense RNA	2 out of 3	63.5695					29.2651	0.0232	fold change	2.92	34.3044	0.0022	fold change	2.44
BC036508	NA		2 out of 3	63.565					38.9329	0.0105	fold change	-3.96	24.6321	0.0072	fold change	1.96
230992_at	NA		2 out of 3	63.563					16.6688	0.0143	fold change	1.91	46.8942	0.0002	fold change	3.3
SKP2	6502	S-phase kinase-associated protein 2, E3 ubiquitin protein ligase	2 out of 3	63.5582					44.3557	0.0027	fold change	-4.77	19.2025	0.0037	fold change	1.72
C2orf72	257407	chromosome 2 open reading frame 72	2 out of 3	63.5476					19.7138	0.034	fold change	2.15	43.8339	1.6e-05	fold change	3.04
AI042344	NA		2 out of 3	63.5411					38.7	0.0292	fold change	-3.92	24.8411	0.0214	fold change	-1.97
RAB11FIP4	84440	RAB11 family interacting protein 4 (class II)	2 out of 3	63.5209					9.87286	0.0197	fold change	1.39	53.6481	0.0056	fold change	3.89
ETHE1	23474	ethylmalonic encephalopathy 1	2 out of 3	63.5209					9.87286	0.0493	fold change	1.39	53.6481	0.0001	fold change	3.89
NUAK2	81788	NUAK family, SNF1-like kinase, 2	2 out of 3	63.5011					24.4072	0.0011	fold change	-2.5	39.094	0.0135	fold change	-2.73
SYNGR1	9145	synaptogyrin 1	2 out of 3	63.4541					20.2063	0.01	fold change	-2.19	43.2477	0.0008	fold change	-2.99
ZNF286A	57335	zinc finger protein 286A	2 out of 3	63.3642					19.4363	0.0003	fold change	-2.13	43.9279	0.0038	fold change	-3.05
EIF2AK4	440275	eukaryotic translation initiation factor 2 alpha kinase 4	2 out of 3	63.3608					20.3401	0.0042	fold change	-2.2	43.0207	0.0062	fold change	-2.98
NEK1	4750	NIMA (never in mitosis gene a)-related kinase 1	2 out of 3	63.3559					13.9156	0.0047	fold change	1.7	49.4403	0.0074	fold change	-3.5
ZNF585A	199704	zinc finger protein 585A	2 out of 3	63.3346					35.6888	0.0058	fold change	-3.57	27.6458	0.0057	fold change	-2.1
PDXK	8566	pyridoxal (pyridoxine, vitamin B6) kinase	2 out of 3	63.332					26.6856	0.0006	fold change	2.68	36.6464	0.0026	fold change	2.58
DHRS11	79154	dehydrogenase/reductase (SDR family) member 11	2 out of 3	63.3229					28.0945	0.0029	fold change	2.81	35.2284	0.0088	fold change	2.5
AKR7A3	22977	aldo-keto reductase family 7, member A3 (aflatoxin aldehyde reductase)	2 out of 3	63.2431					32.4994	0.001	fold change	3.24	30.7437	0.0026	fold change	2.24
TNIP1	10318	TNFAIP3 interacting protein 1	2 out of 3	63.2207					14.9642	0.0324	fold change	1.78	48.2565	0.0003	fold change	-3.4
HDDC3	374659	HD domain containing 3	2 out of 3	63.22					11.794	0.017	fold change	-1.54	51.426	0.0013	fold change	3.66
213924_at	NA		2 out of 3	63.1297					25.6338	0.0185	fold change	2.6	37.4959	0.0036	fold change	-2.62
PRKCDBP	112464	protein kinase C, delta binding protein	2 out of 3	63.1152					25.0386	0.029	fold change	2.55	38.0767	0.0028	fold change	-2.66
Hs.694508	NA		2 out of 3	63.0876					41.1347	0.0237	fold change	-4.25	21.9529	0.0003	fold change	1.84
IAH1	285148	isoamyl acetate-hydrolyzing esterase 1 homolog (S. cerevisiae)	2 out of 3	63.0871					42.8409	9.9e-05	fold change	4.56	20.2463	0.0078	fold change	-1.77
TTC39A	22996	tetratricopeptide repeat domain 39A	2 out of 3	63.0233					48.3134	0.0203	fold change	5.47	14.7099	0.0308	fold change	1.51
COL27A1	85301	collagen, type XXVII, alpha 1	2 out of 3	62.9847					50.352	0.0003	fold change	-5.85	12.6327	0.0087	fold change	-1.4
CSNK1A1	1452	casein kinase 1, alpha 1	2 out of 3	62.9413					38.1002	0.0151	fold change	-3.86	24.8411	0.003	fold change	1.97
CHRM3	1131	cholinergic receptor, muscarinic 3	2 out of 3	62.9357					10.0038	0.0013	fold change	-1.4	52.9319	7.3e-06	fold change	3.8
WDR76	79968	WD repeat domain 76	2 out of 3	62.7174					41.8064	0.0001	fold change	-4.37	20.9111	0.0336	fold change	-1.8
230413_s_at	NA		2 out of 3	62.6509					27.9985	0.0178	fold change	2.8	34.6524	0.0193	fold change	-2.46
ARPC1B	10095	actin related protein 2/3 complex, subunit 1B, 41kDa	2 out of 3	62.5714					52.3462	1.4e-05	fold change	6.33	10.2252	0.0395	fold change	1.23
ANKS4B	257629	ankyrin repeat and sterile alpha motif domain containing 4B	2 out of 3	62.5475					41.6365	0.0001	fold change	4.35	20.9111	0.0069	fold change	1.8
BMP7	655	bone morphogenetic protein 7	2 out of 3	62.5321					22.6906	0.0451	fold change	2.37	39.8416	0.0057	fold change	2.78
BE672291	NA		2 out of 3	62.5304					47.419	0.0073	fold change	-5.3	15.1114	0.0253	fold change	1.53
RNF141	50862	ring finger protein 141	2 out of 3	62.5266					16.5276	6.3e-05	fold change	1.9	45.999	0.0031	fold change	3.23
225474_at	NA		2 out of 3	62.5174					50.3931	0.0243	fold change	5.87	12.1244	0.0226	fold change	1.37
KIAA1147	57189	KIAA1147	2 out of 3	62.514					21.1996	0.0014	fold change	-2.26	41.3145	0.0034	fold change	2.86
TSHZ1	10194	teashirt zinc finger homeobox 1	2 out of 3	62.506					32.9524	0.0088	fold change	-3.29	29.5536	0.0121	fold change	2.19
GRB10	2887	growth factor receptor-bound protein 10	2 out of 3	62.4493					49.6401	0.0268	fold change	5.7	12.8091	0.0273	fold change	-1.41
AI768826	NA		2 out of 3	62.4482					33.2734	0.0001	fold change	-3.32	29.1748	0.0054	fold change	2.17
AW665279	NA		2 out of 3	62.4037					29.6534	0.0093	fold change	-2.95	32.7504	0.0046	fold change	2.35
NEDD4L	23327	neural precursor cell expressed, developmentally down-regulated 4-like, E3 ubiquitin protein ligase	2 out of 3	62.4027					42.6032	0.0333	fold change	-4.5	19.7995	0.0452	fold change	1.75
C6orf170	221322	chromosome 6 open reading frame 170	2 out of 3	62.393					17.747	0.0081	fold change	-1.99	44.646	0.0092	fold change	-3.1
AA732944	NA		2 out of 3	62.3473					45.7595	0.0042	fold change	5	16.5878	0.0128	fold change	1.6
DIAPH2	1730	diaphanous homolog 2 (Drosophila)	2 out of 3	62.3428					24.4072	0.0008	fold change	2.5	37.9357	0.001	fold change	2.65
RAP1GAP2	23108	RAP1 GTPase activating protein 2	2 out of 3	62.322					23.8761	0.0059	fold change	2.46	38.4459	0.0026	fold change	2.69
ZNF134	7693	zinc finger protein 134	2 out of 3	62.3117					47.9741	1.2e-05	fold change	-5.41	14.3376	0.0052	fold change	-1.49
H15073	NA		2 out of 3	62.2972					38.8715	0.0028	fold change	-3.95	23.4257	0.0227	fold change	-1.91
SLC26A11	284129	solute carrier family 26, member 11	2 out of 3	62.2802					25.6338	0.0076	fold change	2.6	36.6464	0.0044	fold change	-2.58
FOXC1	2296	forkhead box C1	2 out of 3	62.2408					9.3995	0.0479	fold change	-1.35	52.8413	0.0235	fold change	-3.79
AU146983	NA		2 out of 3	62.1516					17.8916	0.0484	fold change	-2	44.2599	0.0042	fold change	-3.07
C10orf47	254427	chromosome 10 open reading frame 47	2 out of 3	62.1391					16.9516	0.0056	fold change	1.93	45.1875	0.0065	fold change	-3.15
SHPRH	257218	SNF2 histone linker PHD RING helicase, E3 ubiquitin protein ligase	2 out of 3	62.1315					36.0129	0.0003	fold change	-3.6	26.1185	0.0228	fold change	-2.03
MNS1	55329	meiosis-specific nuclear structural 1	2 out of 3	62.0968					38.2067	0.0403	fold change	-3.87	23.8901	0.0291	fold change	1.93
ZDHHC3	51304	zinc finger, DHHC-type containing 3	2 out of 3	62.0906					15.3568	0.0018	fold change	-1.81	46.7338	0.0076	fold change	3.29
TAP2	6891	transporter 2, ATP-binding cassette, sub-family B (MDR/TAP)	2 out of 3	62.0246					11.0042	0.0292	fold change	1.48	51.0204	0.0006	fold change	-3.62
AP2B1	163	adaptor-related protein complex 2, beta 1 subunit	2 out of 3	62.0149					12.5746	0.0244	fold change	-1.6	49.4403	8.5e-05	fold change	-3.5
TRIB2	28951	tribbles homolog 2 (Drosophila)	2 out of 3	62.0023					40.0493	0.0005	fold change	4.09	21.9529	0.0032	fold change	-1.84
MBNL2	10150	muscleblind-like splicing regulator 2	2 out of 3	61.9969					9.87286	0.0327	fold change	-1.39	52.1241	0.0011	fold change	-3.74
DEFB1	1672	defensin, beta 1	2 out of 3	61.995					51.0845	0.007	fold change	-6.06	10.9104	0.006	fold change	1.29
SLFN5	162394	schlafen family member 5	2 out of 3	61.988					48.5998	0.0006	fold change	-5.52	13.3881	0.0402	fold change	-1.44
SETD9	133383	SET domain containing 9	2 out of 3	61.9819					44.7596	0.0003	fold change	4.85	17.2223	0.0435	fold change	1.63
FAR2	55711	fatty acyl CoA reductase 2	2 out of 3	61.97					46.8586	0.0451	fold change	5.19	15.1114	0.0224	fold change	-1.53
TBC1D30	23329	TBC1 domain family, member 30	2 out of 3	61.9673					32.4137	0.0315	fold change	-3.23	29.5536	0.0047	fold change	2.19
CEP97	79598	centrosomal protein 97kDa	2 out of 3	61.9582					35.1679	0.0234	fold change	-3.51	26.7903	0.0114	fold change	-2.06
ZXDA	7789	zinc finger, X-linked, duplicated A	2 out of 3	61.9058					30.03	0.0055	fold change	-2.99	31.8758	0.0091	fold change	-2.3
RNF213	57674	ring finger protein 213	2 out of 3	61.8905					10.8757	0.0038	fold change	-1.47	40.5512	0.0035	fold change	-2.82
UGT8	7368	UDP glycosyltransferase 8	2 out of 3	61.8855					16.3801	0.0173	fold change	-1.89	45.5054	0.0048	fold change	3.19
COL17A1	1308	collagen, type XVII, alpha 1	2 out of 3	61.8797					17.6198	0.037	fold change	1.98	44.2599	0.0075	fold change	3.07
IGFN1	91156	immunoglobulin-like and fibronectin type III domain containing 1	2 out of 3	61.8705					11.5393	0.013	fold change	1.52	50.3312	0.0028	fold change	-3.55
SWAP70	23075	SWAP switching B-cell complex 70kDa subunit	2 out of 3	61.8676					9.63302	0.0228	fold change	-1.37	52.2346	0.0006	fold change	-3.75
BF000430	NA		2 out of 3	61.864					51.426	0.0092	fold change	-6.15	10.4379	0.0318	fold change	-1.25
ENY2	56943	enhancer of yellow 2 homolog (Drosophila)	2 out of 3	61.8381					15.9589	0.0012	fold change	1.86	45.8791	0.0038	fold change	-3.22
TCEAL3	85012	transcription elongation factor A (SII)-like 3	2 out of 3	61.7331					16.0927	0.031	fold change	1.87	45.6404	0.0021	fold change	-3.2
KIAA0922	23240	KIAA0922	2 out of 3	61.733					47.7874	0.0018	fold change	-5.37	13.9456	0.0169	fold change	-1.47
WDHD1	11169	WD repeat and HMG-box DNA binding protein 1	2 out of 3	61.7268					40.498	4.5e-05	fold change	-4.16	21.2288	0.0491	fold change	1.81
ZNF140	7699	zinc finger protein 140	2 out of 3	61.6657					17.2296	0.0029	fold change	-1.95	44.4361	0.0088	fold change	-3.08
FGFR1OP2	26127	FGFR1 oncogene partner 2	2 out of 3	61.6631					21.4698	0.0015	fold change	-2.28	40.1932	0.0021	fold change	-2.8
1560019_at	NA		2 out of 3	61.6194					10.7464	0.0453	fold change	1.46	50.873	0.0011	fold change	3.6
LMO7	4008	LIM domain 7	2 out of 3	61.5982					21.047	0.0081	fold change	2.25	40.5512	0.0052	fold change	2.82
OXCT1	5019	3-oxoacid CoA transferase 1	2 out of 3	61.5868					51.3616	3.3e-05	fold change	-6.13	10.2252	0.0156	fold change	1.23
SMS	6611	spermine synthase	2 out of 3	61.581					21.7394	0.0018	fold change	2.3	39.8416	0.0003	fold change	-2.78
SLC4A11	83959	solute carrier family 4, sodium borate transporter, member 11	2 out of 3	61.5747					41.3285	1.1e-05	fold change	-4.31	20.2463	0.0044	fold change	-1.77
223586_at	NA		2 out of 3	61.5736					50.6632	0.0001	fold change	-5.96	10.9104	0.0439	fold change	-1.29
AI382026	NA		2 out of 3	61.5268					45.4046	0.003	fold change	4.95	16.1222	0.0288	fold change	1.58
S100A6	6277	S100 calcium binding protein A6	2 out of 3	61.48					20.4961	0.0048	fold change	2.21	40.9839	0.0009	fold change	2.84
RWDD1	51389	RWD domain containing 1	2 out of 3	61.4798					40.78	0.0007	fold change	-4.2	20.6997	0.0076	fold change	-1.79
CLDN1	9076	claudin 1	2 out of 3	61.4025					45.5054	0.0048	fold change	-4.96	15.897	0.0251	fold change	1.57
PTPRG	5793	protein tyrosine phosphatase, receptor type, G	2 out of 3	61.3921					18.007	0.0017	fold change	-2.01	43.3851	0.0007	fold change	-3
HMGN3	9324	high mobility group nucleosomal binding domain 3	2 out of 3	61.3786					36.5374	4.2e-05	fold change	-3.66	24.8411	0.0075	fold change	-1.97
RAB40B	10966	RAB40B, member RAS oncogene family	2 out of 3	61.3472					24.5143	0.0469	fold change	2.51	36.833	0.0022	fold change	2.59
PYROXD2	84795	pyridine nucleotide-disulphide oxidoreductase domain 2	2 out of 3	61.3472					24.5143	0.0388	fold change	2.51	36.833	0.0011	fold change	2.59
EPHB6	2051	EPH receptor B6	2 out of 3	61.3337					16.801	0.0482	fold change	-1.92	44.5327	0.0041	fold change	3.09
LOC727916	727916	uncharacterized LOC727916	2 out of 3	61.2409					30.937	0.0053	fold change	-3.09	30.3039	0.0072	fold change	2.22
NAPEPLD	222236	N-acyl phosphatidylethanolamine phospholipase D	2 out of 3	61.2151					23.9692	0.0049	fold change	-2.47	37.2459	0.0012	fold change	2.61
HIVEP2	3097	human immunodeficiency virus type I enhancer binding protein 2	2 out of 3	61.0889					25.3483	0.0064	fold change	-2.58	35.7406	0.0022	fold change	-2.53
ZADH2	284273	zinc binding alcohol dehydrogenase domain containing 2	2 out of 3	61.0734					28.0945	0.0132	fold change	-2.81	32.9789	0.0094	fold change	2.36
GID8	54994	GID complex subunit 8 homolog (S. cerevisiae)	2 out of 3	61.0605					23.4614	2.2e-05	fold change	-2.43	37.5991	7.3e-05	fold change	2.63
EEF1A2	1917	eukaryotic translation elongation factor 1 alpha 2	2 out of 3	61.0374					31.4838	0.0016	fold change	3.14	29.5536	0.007	fold change	2.19
SKI	6497	v-ski sarcoma viral oncogene homolog (avian)	2 out of 3	61.0032					37.9942	0.0194	fold change	-3.85	23.009	0.0432	fold change	-1.89
LOXL1	4016	lysyl oxidase-like 1	2 out of 3	60.9608					10.0038	0.0338	fold change	-1.4	50.957	0.0003	fold change	3.61
MFI2	4241	antigen p97 (melanoma associated) identified by monoclonal antibodies 133.2 and 96.5	2 out of 3	60.9524					30.937	0.0238	fold change	3.09	30.0154	0.0205	fold change	2.21
HTR7	3363	5-hydroxytryptamine (serotonin) receptor 7, adenylate cyclase-coupled	2 out of 3	60.9365					20.9003	0.0054	fold change	-2.24	40.0362	0.0132	fold change	-2.79
AMMECR1	9949	Alport syndrome, mental retardation, midface hypoplasia and elliptocytosis chromosomal region gene 1	2 out of 3	60.9351					28.3669	0.0003	fold change	-2.83	32.5682	0.0083	fold change	2.34
FBXO30	84085	F-box protein 30	2 out of 3	60.8986					13.7706	0.0264	fold change	-1.69	47.128	0.0002	fold change	-3.31
PNPLA3	80339	patatin-like phospholipase domain containing 3	2 out of 3	60.8768					10.0038	0.0242	fold change	-1.4	50.873	5.5e-05	fold change	-3.6
AW117383	NA		2 out of 3	60.8507					25.1101	0.002	fold change	2.56	35.7406	0.0024	fold change	2.53
PURB	5814	purine-rich element binding protein B	2 out of 3	60.8338					36.9437	0.0012	fold change	-3.71	23.8901	0.016	fold change	1.93
LOC100506948	100506948	uncharacterized LOC100506948	2 out of 3	60.8334					21.7394	0.0479	fold change	-2.3	39.094	0.014	fold change	2.73
MGAT4B	11282	mannosyl (alpha-1,3-)-glycoprotein beta-1,4-N-acetylglucosaminyltransferase, isozyme B	2 out of 3	60.8022					47.8062	0.01	fold change	5.38	12.996	0.0444	fold change	1.42
PID1	55022	phosphotyrosine interaction domain containing 1	2 out of 3	60.633					33.4638	0.0003	fold change	-3.34	27.1692	0.0087	fold change	2.08
ZDHHC9	51114	zinc finger, DHHC-type containing 9	2 out of 3	60.6248					26.9962	0.0028	fold change	2.71	33.6286	7.6e-05	fold change	2.4
RBPMS2	348093	RNA binding protein with multiple splicing 2	2 out of 3	60.5922					31.0385	0.0196	fold change	3.1	29.5536	0.0174	fold change	-2.19
PHLPP2	23035	PH domain and leucine rich repeat protein phosphatase 2	2 out of 3	60.5454					49.0653	0.0113	fold change	5.62	11.4801	0.0258	fold change	1.33
PARD6G	84552	par-6 partitioning defective 6 homolog gamma (C. elegans)	2 out of 3	60.5367					48.7348	0.0003	fold change	-5.54	11.8019	0.0212	fold change	-1.35
AA705933	NA		2 out of 3	60.4152					45.5054	1.1e-05	fold change	-4.96	14.9098	0.0322	fold change	1.52
MFSD12	126321	major facilitator superfamily domain containing 12	2 out of 3	60.3932					32.0002	0.0028	fold change	-3.19	28.393	0.0177	fold change	-2.14
CA442342	NA		2 out of 3	60.3336					43.1113	0.006	fold change	-4.61	17.2223	0.0336	fold change	1.63
SCHIP1	29970	schwannomin interacting protein 1	2 out of 3	60.3295					42.2083	0.0174	fold change	-4.45	18.1211	0.0427	fold change	-1.67
MVP	9961	major vault protein	2 out of 3	60.269					35.6369	0.0015	fold change	3.56	24.6321	0.0138	fold change	1.96
CAPG	822	capping protein (actin filament), gelsolin-like	2 out of 3	60.2344					48.7543	0.0077	fold change	5.55	11.4801	0.0133	fold change	1.33
PTPN14	5784	protein tyrosine phosphatase, non-receptor type 14	2 out of 3	60.1718					27.7582	0.0092	fold change	-2.78	32.4137	0.003	fold change	-2.33
ASPHD1	253982	aspartate beta-hydroxylase domain containing 1	2 out of 3	60.165					37.1559	0.0023	fold change	3.74	23.009	0.022	fold change	1.89
ZNF84	7637	zinc finger protein 84	2 out of 3	60.1295					17.482	0.0172	fold change	-1.97	42.6476	0.0039	fold change	-2.95
FAM214A	56204	family with sequence similarity 214, member A	2 out of 3	60.0988					41.9777	0.0289	fold change	-4.4	18.1211	0.0198	fold change	1.67
DBN1	1627	drebrin 1	2 out of 3	60.0558					17.482	0.0071	fold change	1.97	42.5738	0.0033	fold change	-2.94
CHML	1122	choroideremia-like (Rab escort protein 2)	2 out of 3	60.0501					46.4861	0.001	fold change	5.13	13.564	0.0418	fold change	1.45
AA362254	NA		2 out of 3	60.0414					41.9203	1e-05	fold change	-4.39	18.1211	0.015	fold change	-1.67
RALB	5899	v-ral simian leukemia viral oncogene homolog B (ras related; GTP binding protein)	2 out of 3	60.0249					40.4181	0.0001	fold change	4.15	19.6068	0.0033	fold change	1.74
PTPRU	10076	protein tyrosine phosphatase, receptor type, U	2 out of 3	59.9684					39.2687	0.0002	fold change	-4	20.6997	0.0085	fold change	1.79
FAM200B	285550	family with sequence similarity 200, member B	2 out of 3	59.9283					17.1025	0.0383	fold change	-1.94	42.8258	0.0172	fold change	-2.96
DUT	1854	deoxyuridine triphosphatase	2 out of 3	59.8806					26.9017	0.0174	fold change	-2.7	32.9789	0.0073	fold change	2.36
AL833553	NA		2 out of 3	59.8806					26.9017	0.0232	fold change	-2.7	32.9789	0.0001	fold change	2.36
BLCAP	10904	bladder cancer associated protein	2 out of 3	59.8743					27.9985	0.0027	fold change	-2.8	31.8758	0.0018	fold change	2.3
211619_s_at	NA		2 out of 3	59.8559					32.4137	0.009	fold change	3.23	27.4422	0.0041	fold change	2.09
SCD	6319	stearoyl-CoA desaturase (delta-9-desaturase)	2 out of 3	59.8356					29.0919	0.0237	fold change	-2.9	30.7437	0.0055	fold change	-2.24
KCTD14	65987	potassium channel tetramerisation domain containing 14	2 out of 3	59.8281					17.6198	0.0076	fold change	1.98	42.2083	0.0015	fold change	-2.92
MIR31HG	554202	MIR31 host gene (non-protein coding)	2 out of 3	59.8164					44.9067	0.0016	fold change	4.87	14.9098	0.0015	fold change	1.52
RUFY2	55680	RUN and FYVE domain containing 2	2 out of 3	59.816					40.78	0.0028	fold change	-4.2	19.0359	0.0382	fold change	-1.71
CCL5	6352	chemokine (C-C motif) ligand 5	2 out of 3	59.8126					48.3325	0.0001	fold change	-5.48	11.4801	0.0087	fold change	-1.33
MSRB2	22921	methionine sulfoxide reductase B2	2 out of 3	59.7835					31.785	0.0008	fold change	3.17	27.9985	0.0083	fold change	2.12
ZNF22	7570	zinc finger protein 22	2 out of 3	59.7387					26.2749	0.0145	fold change	-2.65	33.4638	0.0005	fold change	-2.39
AW770245	NA		2 out of 3	59.703					23.0566	0.0015	fold change	2.4	36.6464	0.0159	fold change	2.58
SLC9B2	133308	solute carrier family 9, subfamily B (NHA2, cation proton antiporter 2), member 2	2 out of 3	59.691					25.0386	0.0002	fold change	-2.55	34.6524	0.0163	fold change	-2.46
FABP4	2167	fatty acid binding protein 4, adipocyte	2 out of 3	59.6837					49.8013	0.0344	fold change	5.75	9.8824	0.0307	fold change	1.2
AI950023	NA		2 out of 3	59.6672					41.7495	0.0258	fold change	-4.36	17.9177	0.0196	fold change	-1.66
TRPM4	54795	transient receptor potential cation channel, subfamily M, member 4	2 out of 3	59.5828					32.4137	0.0022	fold change	-3.23	27.1692	0.0101	fold change	2.08
243109_at	NA		2 out of 3	59.5717					13.3648	0.0438	fold change	-1.66	46.2069	8.1e-05	fold change	3.25
FAM46A	55603	family with sequence similarity 46, member A	2 out of 3	59.5549					14.7135	0.0251	fold change	-1.76	44.8414	0.0065	fold change	3.12
C7orf60	154743	chromosome 7 open reading frame 60	2 out of 3	59.4814					36.4724	0.0025	fold change	-3.65	23.009	0.0155	fold change	-1.89
PHGDH	26227	phosphoglycerate dehydrogenase	2 out of 3	59.4617					34.1707	0.009	fold change	-3.41	25.291	0.0077	fold change	-1.99
CHST3	9469	carbohydrate (chondroitin 6) sulfotransferase 3	2 out of 3	59.4363					48.3896	0.0045	fold change	5.49	11.0467	0.0441	fold change	-1.3
MYADM	91663	myeloid-associated differentiation marker	2 out of 3	59.4283					18.321	0.0224	fold change	-2.04	41.1073	0.0063	fold change	-2.85
FAM228B	375190	family with sequence similarity 228, member B	2 out of 3	59.3746					30.1998	0.0359	fold change	3.01	29.1748	0.0114	fold change	-2.17
LMF1	64788	lipase maturation factor 1	2 out of 3	59.3481					28.6044	0.0181	fold change	2.85	30.7437	0.0187	fold change	2.24
FAM211A	388341	family with sequence similarity 211, member A	2 out of 3	59.3378					31.3393	0.0235	fold change	3.13	27.9985	0.0113	fold change	2.12
WDR20	91833	WD repeat domain 20	2 out of 3	59.2353					21.7394	0.0064	fold change	-2.3	37.4959	0.0004	fold change	2.62
UST	10090	uronyl-2-sulfotransferase	2 out of 3	59.2301					41.5521	0.0336	fold change	-4.34	17.6781	0.0225	fold change	-1.65
LOC389906	389906	zinc finger protein 839 pseudogene	2 out of 3	59.2068					39.4073	0.0292	fold change	-4.01	19.7995	0.0278	fold change	-1.75
ABL2	27	v-abl Abelson murine leukemia viral oncogene homolog 2	2 out of 3	59.2059					16.3801	0.0037	fold change	1.89	42.8258	0.0008	fold change	-2.96
IER3	8870	immediate early response 3	2 out of 3	59.1858					24.8814	0.0146	fold change	2.54	34.3044	0.0253	fold change	-2.44
APLP1	333	amyloid beta (A4) precursor-like protein 1	2 out of 3	59.1567					43.8496	0.0333	fold change	4.69	15.3071	0.0148	fold change	-1.54
Hs.676565	NA		2 out of 3	59.1178					38.8715	0.0268	fold change	-3.95	20.2463	0.0105	fold change	1.77
MOGAT3	346606	monoacylglycerol O-acyltransferase 3	2 out of 3	59.0477					37.8189	0.0004	fold change	3.83	21.2288	0.0017	fold change	1.81
SNAI2	6591	snail homolog 2 (Drosophila)	2 out of 3	59.0428					15.4884	0.0372	fold change	-1.82	43.5544	0.0003	fold change	-3.02
ARSE	415	arylsulfatase E (chondrodysplasia punctata 1)	2 out of 3	59.0177					44.3078	0.0012	fold change	4.76	14.7099	0.0083	fold change	1.51
ATP2C1	27032	ATPase, Ca++ transporting, type 2C, member 1	2 out of 3	58.987					13.3648	0.0184	fold change	-1.66	45.0714	0.0002	fold change	3.14
LINC00662	148189	long intergenic non-protein coding RNA 662	2 out of 3	58.9699					43.6628	0.0074	fold change	-4.68	15.3071	0.0051	fold change	-1.54
CREM	1390	cAMP responsive element modulator	2 out of 3	58.9593					18.7171	0.0164	fold change	-2.07	25.4955	0.0177	fold change	-2
KLK8	11202	kallikrein-related peptidase 8	2 out of 3	58.9061					35.8971	0.0023	fold change	3.59	23.009	0.0038	fold change	1.89
VSIG2	23584	V-set and immunoglobulin domain containing 2	2 out of 3	58.8238					46.5567	0.0004	fold change	-5.14	12.2671	0.0249	fold change	1.38
LOC283278	283278	uncharacterized LOC283278	2 out of 3	58.8212					21.5753	0.0252	fold change	2.29	37.2459	0.0007	fold change	2.61
NFKBIE	4794	nuclear factor of kappa light polypeptide gene enhancer in B-cells inhibitor, epsilon	2 out of 3	58.8117					11.9175	0.0142	fold change	-1.55	46.8942	0.0029	fold change	-3.3
PORCN	64840	porcupine homolog (Drosophila)	2 out of 3	58.8082					45.999	0.0003	fold change	-5.04	12.8091	0.0352	fold change	-1.41
LCOR	84458	ligand dependent nuclear receptor corepressor	2 out of 3	58.7962					18.4447	0.0065	fold change	2.05	40.3515	0.0019	fold change	2.81
AKR1C4	1109	aldo-keto reductase family 1, member C4 (chlordecone reductase; 3-alpha hydroxysteroid dehydrogenase, type I; dihydrodiol dehydrogenase 4)	2 out of 3	58.778					32.8468	0.0013	fold change	3.28	25.9312	0.0008	fold change	2.02
DYRK2	8445	dual-specificity tyrosine-(Y)-phosphorylation regulated kinase 2	2 out of 3	58.7635					35.5545	0.0032	fold change	3.55	23.209	0.0339	fold change	1.9
KDELC1	79070	KDEL (Lys-Asp-Glu-Leu) containing 1	2 out of 3	58.7377					10.8757	0.0363	fold change	-1.47	47.862	0.005	fold change	-3.37
RMI2	116028	RMI2, RecQ mediated genome instability 2, homolog (S. cerevisiae)	2 out of 3	58.7157					21.4698	0.0049	fold change	-2.28	37.2459	0.0017	fold change	2.61
PYGB	5834	phosphorylase, glycogen; brain	2 out of 3	58.6932					42.7961	0.0006	fold change	4.55	15.897	0.0151	fold change	1.57
MRPS6	64968	mitochondrial ribosomal protein S6	2 out of 3	58.6932					42.7961	0.0023	fold change	4.55	15.897	0.0092	fold change	1.57
FAM176B	55194	family with sequence similarity 176, member B	2 out of 3	58.643					13.6377	0.0427	fold change	1.68	45.0053	0.0035	fold change	-3.13
PIAS2	9063	protein inhibitor of activated STAT, 2	2 out of 3	58.6199					28.6044	0.0012	fold change	-2.85	30.0154	0.0082	fold change	-2.21
C11orf80	79703	chromosome 11 open reading frame 80	2 out of 3	58.588					16.9516	0.03	fold change	1.93	41.6365	0.0044	fold change	2.88
LOC100129550	100129550	uncharacterized LOC100129550	2 out of 3	58.572					41.1347	0.0449	fold change	-4.25	17.4373	0.0206	fold change	1.64
PTPN1	5770	protein tyrosine phosphatase, non-receptor type 1	2 out of 3	58.4829					29.0919	0.009	fold change	-2.9	29.391	0.005	fold change	-2.18
NPEPL1	79716	aminopeptidase-like 1	2 out of 3	58.4629					22.2591	0.002	fold change	-2.34	36.2038	0.0064	fold change	2.56
RNF157	114804	ring finger protein 157	2 out of 3	58.4468					33.3367	0.0147	fold change	3.33	25.1101	0.012	fold change	1.98
ZNF268	10795	zinc finger protein 268	2 out of 3	58.4306					32.4994	0.0034	fold change	-3.24	25.9312	0.0007	fold change	-2.02
SYNJ2	8871	synaptojanin 2	2 out of 3	58.4162					26.416	0.008	fold change	-2.66	32.0002	0.001	fold change	-2.31
C16orf53	79447	chromosome 16 open reading frame 53	2 out of 3	58.4135					17.6198	0.0004	fold change	1.98	40.7937	4e-05	fold change	2.83
PLRG1	5356	pleiotropic regulator 1	2 out of 3	58.3962					20.9003	0.0005	fold change	-2.24	37.4959	0.0004	fold change	-2.62
KLHL13	90293	kelch-like 13 (Drosophila)	2 out of 3	58.3891					24.4072	0.005	fold change	-2.5	33.9819	0.0344	fold change	-2.42
UPP1	7378	uridine phosphorylase 1	2 out of 3	58.3858					21.7394	2.2e-06	fold change	2.3	36.6464	0.0027	fold change	-2.58
KIF3C	3797	kinesin family member 3C	2 out of 3	58.3856					34.2564	0.0001	fold change	3.42	24.1292	0.0002	fold change	-1.94
RALA	5898	v-ral simian leukemia viral oncogene homolog A (ras related)	2 out of 3	58.2248					37.3137	0.0472	fold change	3.77	20.9111	0.0045	fold change	1.8
GAL	51083	galanin prepropeptide	2 out of 3	58.1506					26.2749	0.0107	fold change	2.65	31.8758	0.0175	fold change	-2.3
LINC00673	100499467	long intergenic non-protein coding RNA 673	2 out of 3	58.1348					14.3009	0.0287	fold change	-1.73	43.8339	0.0001	fold change	3.04
ISG20	3669	interferon stimulated exonuclease gene 20kDa	2 out of 3	58.1155					47.5656	0.0223	fold change	5.32	10.5499	0.0345	fold change	-1.26
AMOTL2	51421	angiomotin like 2	2 out of 3	58.1034					14.1756	0.0072	fold change	-1.72	43.9279	0.0004	fold change	-3.05
PDLIM5	10611	PDZ and LIM domain 5	2 out of 3	58.0943					27.3507	0.0305	fold change	2.74	30.7437	0.0331	fold change	2.24
SLC31A2	1318	solute carrier family 31 (copper transporters), member 2	2 out of 3	58.0849					17.8916	0.0029	fold change	-2	40.1932	0.0075	fold change	-2.8
PRKAR1A	5573	protein kinase, cAMP-dependent, regulatory, type I, alpha	2 out of 3	58.0625					32.9524	0.0132	fold change	-3.29	25.1101	0.0129	fold change	-1.98
1556007_s_at	NA		2 out of 3	58.017					31.0385	0.0434	fold change	-3.1	26.9785	0.0025	fold change	2.07
GCHFR	2644	GTP cyclohydrolase I feedback regulator	2 out of 3	58.0108					31.8922	0.0008	fold change	3.18	26.1185	0.0053	fold change	2.03
PAM	5066	peptidylglycine alpha-amidating monooxygenase	2 out of 3	57.9689					47.419	0.0002	fold change	5.3	10.5499	0.007	fold change	-1.26
C18orf54	162681	chromosome 18 open reading frame 54	2 out of 3	57.9635					25.7789	0.008	fold change	-2.61	32.1846	0.0013	fold change	-2.32
MUC3B	57876	mucin 3B, cell surface associated	2 out of 3	57.955					39.4073	0.0061	fold change	4.01	18.5476	0.0109	fold change	1.69
FUBP1	8880	far upstream element (FUSE) binding protein 1	2 out of 3	57.9534					45.3206	0.0124	fold change	-4.93	12.6327	0.02	fold change	-1.4
TM4SF1	4071	transmembrane 4 L six family member 1	2 out of 3	57.8717					41.7495	0.0002	fold change	4.36	16.1222	0.0201	fold change	1.58
STS	412	steroid sulfatase (microsomal), isozyme S	2 out of 3	57.8553					14.3009	0.002	fold change	1.73	43.5544	0.0051	fold change	3.02
1569362_at	NA		2 out of 3	57.8287					45.3877	0.0015	fold change	-4.94	12.441	0.0002	fold change	-1.39
COL18A1	80781	collagen, type XVIII, alpha 1	2 out of 3	57.7935					32.9524	0.0354	fold change	3.29	24.8411	0.015	fold change	-1.97
LGR6	59352	leucine-rich repeat containing G protein-coupled receptor 6	2 out of 3	57.7736					32.6635	1.3e-05	fold change	3.26	25.1101	0.0227	fold change	1.98
AA744622	NA		2 out of 3	57.7509					19.305	0.0463	fold change	-2.12	38.4459	0.0164	fold change	2.69
TAGLN	6876	transgelin	2 out of 3	57.7022					20.2063	0.0002	fold change	-2.19	37.4959	0.0015	fold change	-2.62
MCOLN2	255231	mucolipin 2	2 out of 3	57.6927					15.1188	0.0029	fold change	-1.79	42.5738	0.0003	fold change	-2.94
HPS5	11234	Hermansky-Pudlak syndrome 5	2 out of 3	57.6305					19.5538	0.0016	fold change	2.14	38.0767	0.0006	fold change	-2.66
MOK	5891	MOK protein kinase	2 out of 3	57.5214					27.2174	0.0013	fold change	2.73	30.3039	0.0211	fold change	-2.22
NIN	51199	ninein (GSK3B interacting protein)	2 out of 3	57.5144					14.0524	0.013	fold change	-1.71	43.462	0.0018	fold change	-3.01
BE383308	NA		2 out of 3	57.5038					41.1347	0.0006	fold change	-4.25	16.3691	0.015	fold change	-1.59
CPQ	10404	carboxypeptidase Q	2 out of 3	57.4893					17.8916	0.0472	fold change	-2	39.5977	0.0051	fold change	-2.76
E2F5	1875	E2F transcription factor 5, p130-binding	2 out of 3	57.4818					38.4459	0.0065	fold change	3.9	19.0359	0.0107	fold change	-1.71
BF509267	NA		2 out of 3	57.4807					30.3115	0.0041	fold change	3.02	27.1692	0.0122	fold change	2.08
AK000119	NA		2 out of 3	57.4723					30.03	0.0134	fold change	-2.99	27.4422	0.0018	fold change	2.09
GSTK1	373156	glutathione S-transferase kappa 1	2 out of 3	57.39					18.4447	0.0264	fold change	2.05	38.9454	0.0039	fold change	2.72
TLE1	7088	transducin-like enhancer of split 1 (E(sp1) homolog, Drosophila)	2 out of 3	57.39					18.4447	0.0415	fold change	-2.05	38.9454	0.0313	fold change	-2.72
ABHD5	51099	abhydrolase domain containing 5	2 out of 3	57.3256					44.5165	0.0085	fold change	-4.81	12.8091	0.0106	fold change	-1.41
Hs.631395	NA		2 out of 3	57.3251					39.4073	0.0152	fold change	-4.01	17.9177	0.0411	fold change	-1.66
CDCP1	64866	CUB domain containing protein 1	2 out of 3	57.3192					12.3138	0.0326	fold change	1.58	45.0053	0.0012	fold change	-3.13
GLB1L2	89944	galactosidase, beta 1-like 2	2 out of 3	57.3168					22.2591	0.0036	fold change	2.34	35.0577	0.0046	fold change	2.49
TMEM136	219902	transmembrane protein 136	2 out of 3	57.2805					15.4884	0.0068	fold change	1.82	41.792	0.0071	fold change	-2.89
AL122039	NA		2 out of 3	57.2738					30.937	0.028	fold change	-3.09	26.3369	0.0093	fold change	2.04
PNPLA6	10908	patatin-like phospholipase domain containing 6	2 out of 3	57.2354					22.5242	0.0181	fold change	2.36	34.7111	0.015	fold change	-2.47
REPS1	85021	RALBP1 associated Eps domain containing 1	2 out of 3	57.1985					31.703	0.0097	fold change	-3.16	25.4955	0.0026	fold change	-2
LOC100506922	100506922	uncharacterized LOC100506922	2 out of 3	57.1732					43.066	0.0057	fold change	4.6	14.1072	0.0028	fold change	1.48
TRIM7	81786	tripartite motif containing 7	2 out of 3	57.1726					14.9642	0.0318	fold change	-1.78	42.2083	0.0007	fold change	2.92
ZIC2	7546	Zic family member 2	2 out of 3	57.163					18.7171	0.008	fold change	-2.07	38.4459	0.0009	fold change	-2.69
TMEM63A	9725	transmembrane protein 63A	2 out of 3	57.1319					10.0038	0.0375	fold change	1.4	47.128	0.0129	fold change	3.31
FAM216A	29902	family with sequence similarity 216, member A	2 out of 3	57.1267					14.3009	0.0027	fold change	1.73	42.8258	0.0313	fold change	-2.96
IQCE	23288	IQ motif containing E	2 out of 3	57.0969					40.1407	0.0299	fold change	4.1	16.9562	0.0059	fold change	1.62
MYL6B	140465	myosin, light chain 6B, alkali, smooth muscle and non-muscle	2 out of 3	57.0949					19.0183	0.0008	fold change	-2.1	38.0767	0.0007	fold change	-2.66
OIP5-AS1	729082	OIP5 antisense RNA 1	2 out of 3	57.0085					30.03	0.0076	fold change	-2.99	26.9785	0.0004	fold change	-2.07
KDELR3	11015	KDEL (Lys-Asp-Glu-Leu) endoplasmic reticulum protein retention receptor 3	2 out of 3	56.9578					11.3928	0.0395	fold change	-1.51	23.8901	0.0013	fold change	1.93
AI798680	NA		2 out of 3	56.9481					37.5302	0.0127	fold change	-3.79	19.4179	0.025	fold change	1.73
CAAP1	79886	caspase activity and apoptosis inhibitor 1	2 out of 3	56.9113					42.3977	0.0011	fold change	-4.47	14.5137	0.036	fold change	-1.5
TCF7L2	6934	transcription factor 7-like 2 (T-cell specific, HMG-box)	2 out of 3	56.8794					23.0566	0.0039	fold change	2.4	33.8229	0.001	fold change	2.41
CDK17	5128	cyclin-dependent kinase 17	2 out of 3	56.7869					10.2653	0.0118	fold change	1.42	46.5216	0.0044	fold change	-3.27
242844_at	NA		2 out of 3	56.7538					39.9712	0.0289	fold change	4.08	16.7826	0.0447	fold change	1.61
ABHD13	84945	abhydrolase domain containing 13	2 out of 3	56.7237					25.7789	0.0087	fold change	-2.61	30.9448	0.026	fold change	-2.25
CPEB4	80315	cytoplasmic polyadenylation element binding protein 4	2 out of 3	56.705					16.6688	0.0203	fold change	1.91	40.0362	0.0028	fold change	-2.79
FNIP2	57600	folliculin interacting protein 2	2 out of 3	56.6713					15.3568	0.0188	fold change	1.81	41.3145	0.0114	fold change	2.86
TP53TG1	11257	TP53 target 1 (non-protein coding)	2 out of 3	56.6501					13.0957	0.0483	fold change	-1.64	43.5544	0.0003	fold change	3.02
N62827	NA		2 out of 3	56.6442					28.4918	0.005	fold change	-2.84	28.1524	0.0383	fold change	-2.13
LPHN1	22859	latrophilin 1	2 out of 3	56.6097					27.9985	4e-05	fold change	2.8	28.6112	0.0015	fold change	2.15
JHDM1D	80853	jumonji C domain containing histone demethylase 1 homolog D (S. cerevisiae)	2 out of 3	56.5536					32.6635	0.0007	fold change	-3.26	23.8901	0.0057	fold change	1.93
PLAA	9373	phospholipase A2-activating protein	2 out of 3	56.5341					29.0919	0.0437	fold change	-2.9	27.4422	0.0051	fold change	-2.09
Hs.674068	NA		2 out of 3	56.5308					19.5538	0.012	fold change	-2.14	36.9771	0.0055	fold change	2.6
TTBK2	146057	tau tubulin kinase 2	2 out of 3	56.5161					10.8757	0.0025	fold change	-1.47	45.6404	0.0086	fold change	-3.2
ZFAND6	54469	zinc finger, AN1-type domain 6	2 out of 3	56.397					21.3393	0.0283	fold change	-2.27	35.0577	0.001	fold change	2.49
228583_at	NA		2 out of 3	56.3915					41.4817	0.0007	fold change	-4.33	14.9098	0.0026	fold change	1.52
CSRP1	1465	cysteine and glycine-rich protein 1	2 out of 3	56.3779					10.3789	0.0225	fold change	-1.43	45.999	0.0011	fold change	3.23
XRCC4	7518	X-ray repair complementing defective repair in Chinese hamster cells 4	2 out of 3	56.3367					40.6587	0.0054	fold change	4.19	15.6781	0.0184	fold change	1.56
EEPD1	80820	endonuclease/exonuclease/phosphatase family domain containing 1	2 out of 3	56.3347					33.9254	0.0326	fold change	3.38	22.4093	0.0352	fold change	1.86
USP46	64854	ubiquitin specific peptidase 46	2 out of 3	56.3249					31.4838	0.0015	fold change	-3.14	24.8411	0.0054	fold change	-1.97
PDE9A	5152	phosphodiesterase 9A	2 out of 3	56.3165					35.0877	0.0027	fold change	3.5	21.2288	0.0054	fold change	1.81
PCSK6	5046	proprotein convertase subtilisin/kexin type 6	2 out of 3	56.2829					11.5393	0.0061	fold change	-1.52	44.7435	0.0032	fold change	3.11
VAT1	10493	vesicle amine transport protein 1 homolog (T. californica)	2 out of 3	56.2709					42.7069	0.0036	fold change	4.53	13.564	0.0304	fold change	-1.45
SLC12A6	9990	solute carrier family 12 (potassium/chloride transporters), member 6	2 out of 3	56.2631					41.7495	0.0133	fold change	-4.36	14.5137	0.0012	fold change	-1.5
KIAA1161	57462	KIAA1161	2 out of 3	56.2616					12.7072	0.0071	fold change	-1.61	43.5544	3.1e-05	fold change	3.02
FANCM	57697	Fanconi anemia, complementation group M	2 out of 3	56.2568					40.78	0.0007	fold change	-4.2	15.4767	0.0029	fold change	1.55
JUND	3727	jun D proto-oncogene	2 out of 3	56.2261					15.1188	0.0288	fold change	1.79	41.1073	0.0286	fold change	-2.85
ROR1	4919	receptor tyrosine kinase-like orphan receptor 1	2 out of 3	56.2052					34.458	0.0298	fold change	3.44	21.7472	0.0018	fold change	-1.83
CEP63	80254	centrosomal protein 63kDa	2 out of 3	56.2022					32.7766	0.0069	fold change	-3.27	23.4257	0.0017	fold change	1.91
AW299775	NA		2 out of 3	56.1698					46.0507	0.0016	fold change	-5.05	10.1191	0.012	fold change	-1.22
ZNF92	168374	zinc finger protein 92	2 out of 3	56.1675					32.2774	0.0004	fold change	-3.22	23.8901	0.0363	fold change	1.93
STK39	27347	serine threonine kinase 39	2 out of 3	56.1606					23.747	0.037	fold change	2.45	32.4137	0.0009	fold change	2.33
AHR	196	aryl hydrocarbon receptor	2 out of 3	56.1398					15.5886	0.0322	fold change	-1.83	40.5512	0.0042	fold change	2.82
ARHGEF9	23229	Cdc42 guanine nucleotide exchange factor (GEF) 9	2 out of 3	56.0802					35.3804	0.0007	fold change	3.53	20.6997	0.0368	fold change	1.79
PCDHA12	56137	protocadherin alpha 12	2 out of 3	56.045					37.9239	0.0021	fold change	-3.84	18.1211	0.0038	fold change	-1.67
FAM82A1	151393	family with sequence similarity 82, member A1	2 out of 3	56.0059					11.2623	0.0405	fold change	1.5	44.7435	0.0025	fold change	3.11
ALAS1	211	aminolevulinate, delta-, synthase 1	2 out of 3	55.9914					42.6032	0.0008	fold change	4.5	13.3881	0.0085	fold change	-1.44
STX3	6809	syntaxin 3	2 out of 3	55.9339					10.7464	0.0082	fold change	1.46	45.1875	0.0018	fold change	3.15
TMC6	11322	transmembrane channel-like 6	2 out of 3	55.8817					21.7394	0.0022	fold change	-2.3	34.1423	0.0007	fold change	2.43
NPL	80896	N-acetylneuraminate pyruvate lyase (dihydrodipicolinate synthase)	2 out of 3	55.8705					45.3206	0.0112	fold change	-4.93	10.5499	0.0451	fold change	1.26
CASK	8573	calcium/calmodulin-dependent serine protein kinase (MAGUK family)	2 out of 3	55.8244					18.5785	0.0004	fold change	-2.06	37.2459	0.003	fold change	2.61
SEMA6A	57556	sema domain, transmembrane domain (TM), and cytoplasmic domain, (semaphorin) 6A	2 out of 3	55.7804					9.3995	0.0233	fold change	1.35	46.3809	0.0059	fold change	3.26
STXBP1	6812	syntaxin binding protein 1	2 out of 3	55.7626					25.4586	0.0184	fold change	2.59	30.3039	0.0068	fold change	-2.22
RAB27A	5873	RAB27A, member RAS oncogene family	2 out of 3	55.7227					40.246	0.0014	fold change	-4.12	15.4767	0.0065	fold change	1.55
ADI1	55256	acireductone dioxygenase 1	2 out of 3	55.6723					37.9942	0.0011	fold change	3.85	17.6781	7.2e-05	fold change	1.65
METAP2	10988	methionyl aminopeptidase 2	2 out of 3	55.6624					13.7706	0.0226	fold change	1.69	41.8918	0.0014	fold change	-2.9
SH3KBP1	30011	SH3-domain kinase binding protein 1	2 out of 3	55.6441					38.2067	0.0013	fold change	3.87	17.4373	0.0054	fold change	-1.64
SPAG4	6676	sperm associated antigen 4	2 out of 3	55.533					12.7072	0.0285	fold change	-1.61	42.8258	0.0007	fold change	-2.96
MRPS12	6183	mitochondrial ribosomal protein S12	2 out of 3	55.5167					31.1725	0.0128	fold change	-3.12	24.3443	0.0074	fold change	-1.95
DDX58	23586	DEAD (Asp-Glu-Ala-Asp) box polypeptide 58	2 out of 3	55.5071					14.7135	0.037	fold change	1.76	40.7937	0.007	fold change	-2.83
EID2	163126	EP300 interacting inhibitor of differentiation 2	2 out of 3	55.497					37.8189	9e-05	fold change	-3.83	17.6781	0.0208	fold change	-1.65
PTPRK	5796	protein tyrosine phosphatase, receptor type, K	2 out of 3	55.4914					36.9437	0.0132	fold change	-3.71	18.5476	0.0193	fold change	1.69
PDCD4	27250	programmed cell death 4 (neoplastic transformation inhibitor)	2 out of 3	55.4704					15.1188	0.0357	fold change	1.79	40.3515	0.0075	fold change	2.81
235412_at	NA		2 out of 3	55.4702					23.0566	0.0147	fold change	-2.4	32.4137	0.0174	fold change	-2.33
SH3PXD2A	9644	SH3 and PX domains 2A	2 out of 3	55.4291					33.9254	0.0016	fold change	-3.38	21.5036	0.0142	fold change	1.82
ARFGAP3	26286	ADP-ribosylation factor GTPase activating protein 3	2 out of 3	55.4178					31.785	0.0006	fold change	3.17	23.6328	0.0387	fold change	-1.92
BTG2	7832	BTG family, member 2	2 out of 3	55.4164					39.7384	0.0175	fold change	-4.05	15.6781	0.0007	fold change	1.56
CLMN	79789	calmin (calponin-like, transmembrane)	2 out of 3	55.4084					10.8757	0.0171	fold change	1.47	44.5327	0.0227	fold change	3.09
VANGL1	81839	vang-like 1 (van gogh, Drosophila)	2 out of 3	55.4021					38.4459	0.0001	fold change	-3.9	16.9562	0.0056	fold change	-1.62
AK024921	NA		2 out of 3	55.4021					40.8884	0.0233	fold change	-4.22	14.5137	0.0063	fold change	1.5
TMX3	54495	thioredoxin-related transmembrane protein 3	2 out of 3	55.3578					44.1805	0.005	fold change	-4.74	11.1773	0.0455	fold change	-1.31
TMEM131	23505	transmembrane protein 131	2 out of 3	55.3505					29.855	0.0017	fold change	2.97	25.4955	0.0003	fold change	-2
KDM1B	221656	lysine (K)-specific demethylase 1B	2 out of 3	55.3431					32.1341	0.0016	fold change	3.2	23.209	0.0216	fold change	1.9
MCEE	84693	methylmalonyl CoA epimerase	2 out of 3	55.3092					17.1025	0.0182	fold change	1.94	38.2067	0.0006	fold change	2.67
SKA1	220134	spindle and kinetochore associated complex subunit 1	2 out of 3	55.3038					28.7853	0.0374	fold change	-2.87	26.5186	0.0145	fold change	-2.05
CAMK4	814	calcium/calmodulin-dependent protein kinase IV	2 out of 3	55.2536					34.3425	0.0088	fold change	-3.43	20.9111	0.0465	fold change	-1.8
SLC6A8	6535	solute carrier family 6 (neurotransmitter transporter, creatine), member 8	2 out of 3	55.2453					9.75688	0.0033	fold change	1.38	45.4885	0.0052	fold change	-3.18
NFIC	4782	nuclear factor I/C (CCAAT-binding transcription factor)	2 out of 3	55.2201					11.1187	0.0029	fold change	1.49	44.1014	0.007	fold change	-3.06
NXN	64359	nucleoredoxin	2 out of 3	55.2033					21.7394	0.0046	fold change	-2.3	33.4638	0.0011	fold change	-2.39
MAP1LC3A	84557	microtubule-associated protein 1 light chain 3 alpha	2 out of 3	55.1652					17.2296	0.0256	fold change	-1.95	37.9357	0.0371	fold change	-2.65
NFU1	27247	NFU1 iron-sulfur cluster scaffold homolog (S. cerevisiae)	2 out of 3	55.1508					24.4072	0.0042	fold change	2.5	30.7437	0.0037	fold change	-2.24
KLHL8	57563	kelch-like 8 (Drosophila)	2 out of 3	55.1376					41.7495	0.0051	fold change	-4.36	13.3881	0.008	fold change	-1.44
ADAP1	11033	ArfGAP with dual PH domains 1	2 out of 3	55.0982					18.1211	0.0014	fold change	2.02	36.9771	0.0027	fold change	2.6
HIST1H2AC	8334	histone cluster 1, H2ac	2 out of 3	55.0847					38.3021	0.0045	fold change	-3.88	16.7826	0.0284	fold change	1.61
GALK2	2585	galactokinase 2	2 out of 3	55.0382					17.1025	5.3e-07	fold change	1.94	37.9357	0.0001	fold change	2.65
STRADB	55437	STE20-related kinase adaptor beta	2 out of 3	54.9816					44.9891	0.0006	fold change	4.88	9.99245	0.0333	fold change	-1.21
LTBP2	4053	latent transforming growth factor beta binding protein 2	2 out of 3	54.9654					30.6211	0.0012	fold change	-3.06	24.3443	0.0186	fold change	-1.95
LOC441528	441528	uncharacterized LOC441528	2 out of 3	54.9486					44.0381	0.0059	fold change	-4.72	10.9104	0.0345	fold change	-1.29
AI734111	NA		2 out of 3	54.933					35.8971	0.0022	fold change	-3.59	19.0359	0.0052	fold change	-1.71
ANKRD10	55608	ankyrin repeat domain 10	2 out of 3	54.9311					43.2934	0.0164	fold change	-4.63	11.6377	0.0436	fold change	-1.34
205525_at	NA		2 out of 3	54.9019					25.3483	0.0066	fold change	-2.58	29.5536	0.0008	fold change	-2.19
HIST1H2BF	8343	histone cluster 1, H2bf	2 out of 3	54.8416					27.3994	0.0341	fold change	-2.75	27.4422	0.0165	fold change	2.09
RBP1	5947	retinol binding protein 1, cellular	2 out of 3	54.8222					38.7	0.0063	fold change	-3.92	16.1222	0.0035	fold change	-1.58
SDC3	9672	syndecan 3	2 out of 3	54.815					10.3789	0.0341	fold change	1.43	44.4361	0.0097	fold change	-3.08
TPBG	7162	trophoblast glycoprotein	2 out of 3	54.7304					44.1805	0.001	fold change	-4.74	10.5499	0.0434	fold change	-1.26
RALGPS2	55103	Ral GEF with PH domain and SH3 binding motif 2	2 out of 3	54.6851					39.007	0.0003	fold change	3.97	15.6781	0.0445	fold change	1.56
F2R	2149	coagulation factor II (thrombin) receptor	2 out of 3	54.6218					36.9437	0.0078	fold change	3.71	17.6781	0.0272	fold change	-1.65
NTN4	59277	netrin 4	2 out of 3	54.599					34.7996	0.0022	fold change	-3.47	19.7995	0.0118	fold change	-1.75
ACOT8	10005	acyl-CoA thioesterase 8	2 out of 3	54.582					37.9942	8e-05	fold change	3.85	16.5878	0.0055	fold change	1.6
RAB2A	5862	RAB2A, member RAS oncogene family	2 out of 3	54.5481					41.5521	0.0016	fold change	4.34	12.996	0.0195	fold change	-1.42
ZBTB20	26137	zinc finger and BTB domain containing 20	2 out of 3	54.4945					29.6534	0.0169	fold change	2.95	24.8411	0.0203	fold change	-1.97
EPM2A	7957	epilepsy, progressive myoclonus type 2A, Lafora disease (laforin)	2 out of 3	54.491					37.2687	0.0008	fold change	-3.76	17.2223	0.0462	fold change	-1.63
NR2F2-AS1	644192	NR2F2 antisense RNA 1	2 out of 3	54.4564					42.4856	0.0061	fold change	-4.48	11.9709	0.0306	fold change	-1.36
LINS	55180	lines homolog (Drosophila)	2 out of 3	54.456					32.9524	0.0296	fold change	-3.29	21.5036	0.0158	fold change	1.82
LOC100132999	100132999	uncharacterized LOC100132999	2 out of 3	54.4355					35.0177	0.001	fold change	-3.49	19.4179	0.0009	fold change	-1.73
PGRMC1	10857	progesterone receptor membrane component 1	2 out of 3	54.4307					16.0927	0.0046	fold change	1.87	38.338	0.0006	fold change	2.68
LOC729839	729839	DTW domain containing 2 pseudogene	2 out of 3	54.4001					18.1962	0.0084	fold change	-2.03	36.2038	0.0006	fold change	-2.56
AIDA	64853	axin interactor, dorsalization associated	2 out of 3	54.3775					27.8589	0.0107	fold change	2.79	26.5186	0.0161	fold change	-2.05
LOC400657	400657	uncharacterized LOC400657	2 out of 3	54.3626					30.937	0.0013	fold change	-3.09	23.4257	0.0095	fold change	1.91
MID2	11043	midline 2	2 out of 3	54.3422					44.117	0.0006	fold change	-4.73	10.2252	0.0084	fold change	-1.23
CDK18	5129	cyclin-dependent kinase 18	2 out of 3	54.3356					24.3201	0.0003	fold change	2.49	30.0154	0.0008	fold change	2.21
LPAR6	10161	lysophosphatidic acid receptor 6	2 out of 3	54.335					25.9421	0.0302	fold change	-2.62	28.393	0.0022	fold change	2.14
WAC	51322	WW domain containing adaptor with coiled-coil	2 out of 3	54.3183					21.3393	0.0041	fold change	2.27	32.9789	0.0299	fold change	-2.36
RHOF	54509	ras homolog family member F (in filopodia)	2 out of 3	54.218					39.8804	0.0074	fold change	4.07	14.3376	0.0194	fold change	-1.49
CALHM2	51063	calcium homeostasis modulator 2	2 out of 3	54.1566					40.0493	0.0095	fold change	4.09	14.1072	0.0047	fold change	1.48
TMEM106B	54664	transmembrane protein 106B	2 out of 3	54.076					39.7384	3.1e-05	fold change	4.05	14.3376	0.0024	fold change	1.49
ST7	7982	suppression of tumorigenicity 7	2 out of 3	54.0704					12.5746	0.0066	fold change	-1.6	41.4958	0.0004	fold change	2.87
FGD6	55785	FYVE, RhoGEF and PH domain containing 6	2 out of 3	54.0675					22.3726	0.0174	fold change	2.35	31.6949	0.0058	fold change	-2.29
RCAN1	1827	regulator of calcineurin 1	2 out of 3	54.0625					17.2296	0.0189	fold change	1.95	36.833	0.0003	fold change	-2.59
GPSM1	26086	G-protein signaling modulator 1	2 out of 3	54.0616					18.321	0.0033	fold change	2.04	35.7406	0.0017	fold change	-2.53
GNPNAT1	64841	glucosamine-phosphate N-acetyltransferase 1	2 out of 3	54.0014					23.0566	0.037	fold change	-2.4	30.9448	0.0025	fold change	2.25
DYNLT3	6990	dynein, light chain, Tctex-type 3	2 out of 3	53.9951					17.3487	0.0053	fold change	1.96	36.6464	0.0024	fold change	2.58
KHDRBS3	10656	KH domain containing, RNA binding, signal transduction associated 3	2 out of 3	53.9765					12.1845	0.0213	fold change	-1.57	41.792	0.05	fold change	-2.89
FNTB	2342	farnesyltransferase, CAAX box, beta	2 out of 3	53.9687					20.3401	0.0308	fold change	-2.2	33.6286	0.0421	fold change	2.4
CAV2	858	caveolin 2	2 out of 3	53.9519					19.97	0.0153	fold change	-2.17	33.9819	0.0006	fold change	-2.42
HIF1A	3091	hypoxia inducible factor 1, alpha subunit (basic helix-loop-helix transcription factor)	2 out of 3	53.9443					30.3115	0.0034	fold change	-3.02	23.6328	0.0019	fold change	-1.92
LINC00675	100289255	long intergenic non-protein coding RNA 675	2 out of 3	53.9331					29.0919	0.0154	fold change	2.9	24.8411	0.0462	fold change	1.97
PLA2R1	22925	phospholipase A2 receptor 1, 180kDa	2 out of 3	53.9226					38.4459	0.0268	fold change	3.9	15.4767	0.0197	fold change	1.55
C11orf54	28970	chromosome 11 open reading frame 54	2 out of 3	53.8192					41.5521	0.0045	fold change	4.34	12.2671	0.0196	fold change	1.38
BF055491	NA		2 out of 3	53.7867					14.8414	0.0172	fold change	-1.77	38.9454	0.0114	fold change	2.72
FOXL1	2300	forkhead box L1	2 out of 3	53.7775					18.9188	0.0177	fold change	2.09	34.8588	0.0046	fold change	2.48
SIX1	6495	SIX homeobox 1	2 out of 3	53.7407					19.4363	0.0047	fold change	-2.13	34.3044	0.0029	fold change	-2.44
ANG	283	angiogenin, ribonuclease, RNase A family, 5	2 out of 3	53.7221					26.5529	0.0002	fold change	2.67	27.1692	0.0006	fold change	2.08
RAB32	10981	RAB32, member RAS oncogene family	2 out of 3	53.7067					9.87286	0.0444	fold change	-1.39	43.8339	0.0013	fold change	-3.04
PRPSAP2	5636	phosphoribosyl pyrophosphate synthetase-associated protein 2	2 out of 3	53.6413					13.9156	0.0003	fold change	-1.7	39.7257	0.0014	fold change	-2.77
ORAI2	80228	ORAI calcium release-activated calcium modulator 2	2 out of 3	53.6299					36.4076	0.0293	fold change	3.64	17.2223	0.0391	fold change	-1.63
MBD2	8932	methyl-CpG binding domain protein 2	2 out of 3	53.6152					21.047	0.0006	fold change	-2.25	32.5682	0.0082	fold change	2.34
IQCK	124152	IQ motif containing K	2 out of 3	53.5825					34.7996	0.0221	fold change	-3.47	18.7829	0.0113	fold change	1.7
2013-09-06	23157	septin 6	2 out of 3	53.5647					15.1188	0.0396	fold change	1.79	38.4459	0.005	fold change	-2.69
E2F7	144455	E2F transcription factor 7	2 out of 3	53.5525					28.7114	0.0083	fold change	-2.86	24.8411	0.0152	fold change	-1.97
NABP1	64859	nucleic acid binding protein 1	2 out of 3	53.5486					24.1576	0.0027	fold change	2.48	29.391	0.0012	fold change	-2.18
TLR6	10333	toll-like receptor 6	2 out of 3	53.4528					41.3285	0.0109	fold change	4.31	12.1244	0.0205	fold change	-1.37
BAG5	9529	BCL2-associated athanogene 5	2 out of 3	53.3866					21.8865	0.0229	fold change	-2.31	31.5	0.0038	fold change	2.28
PDCD5	9141	programmed cell death 5	2 out of 3	53.3843					25.9421	0.0245	fold change	-2.62	27.4422	0.019	fold change	-2.09
HTRA1	5654	HtrA serine peptidase 1	2 out of 3	53.3696					18.7171	0.0059	fold change	-2.07	34.6524	0.0017	fold change	2.46
VSIG10	54621	V-set and immunoglobulin domain containing 10	2 out of 3	53.3468					25.3483	0.0033	fold change	2.58	27.9985	0.0046	fold change	2.12
JARID2	3720	jumonji, AT rich interactive domain 2	2 out of 3	53.3387					35.0177	8e-05	fold change	-3.49	18.321	0.0486	fold change	-1.68
IRF2BPL	64207	interferon regulatory factor 2 binding protein-like	2 out of 3	53.3291					41.8491	0.004	fold change	-4.38	11.4801	0.019	fold change	-1.33
TMEM164	84187	transmembrane protein 164	2 out of 3	53.314					33.0677	0.0027	fold change	3.3	20.2463	0.0148	fold change	1.77
TRAM2	9697	translocation associated membrane protein 2	2 out of 3	53.314					20.9003	0.0037	fold change	-2.24	32.4137	0.0022	fold change	-2.33
SRSF4	6429	serine/arginine-rich splicing factor 4	2 out of 3	53.3014					42.7515	0.0424	fold change	-4.54	10.5499	0.0066	fold change	-1.26
FANCI	55215	Fanconi anemia, complementation group I	2 out of 3	53.2807					29.855	6.4e-05	fold change	-2.97	23.4257	0.0092	fold change	1.91
MAGEF1	64110	melanoma antigen family F, 1	2 out of 3	53.2676					37.3706	6.2e-06	fold change	-3.78	15.897	0.0474	fold change	1.57
B3GNT3	10331	UDP-GlcNAc:betaGal beta-1,3-N-acetylglucosaminyltransferase 3	2 out of 3	53.2463					14.3009	0.001	fold change	1.73	38.9454	0.005	fold change	2.72
MAP3K13	9175	mitogen-activated protein kinase kinase kinase 13	2 out of 3	53.2439					10.8757	0.0375	fold change	1.47	42.3682	0.0004	fold change	2.93
KCTD15	79047	potassium channel tetramerisation domain containing 15	2 out of 3	53.2304					43.1113	0.0003	fold change	-4.61	10.1191	0.0056	fold change	-1.22
LOC100505519	100505519	uncharacterized LOC100505519	2 out of 3	53.1318					34.5841	0.0059	fold change	-3.45	18.5476	0.0284	fold change	-1.69
SHH	6469	sonic hedgehog	2 out of 3	53.1307					40.498	0.005	fold change	4.16	12.6327	0.0104	fold change	1.4
SLC43A3	29015	solute carrier family 43, member 3	2 out of 3	53.1056					37.9942	0.0051	fold change	-3.85	15.1114	0.0146	fold change	-1.53
GNAS	2778	GNAS complex locus	2 out of 3	53.0944					15.3568	0.0307	fold change	-1.81	37.7376	0.0027	fold change	2.64
DAGLB	221955	diacylglycerol lipase, beta	2 out of 3	53.0912					10.2653	0.0059	fold change	1.42	42.8258	0.0014	fold change	-2.96
ZSWIM5	57643	zinc finger, SWIM-type containing 5	2 out of 3	53.0659					36.9437	0.0307	fold change	3.71	16.1222	0.0016	fold change	1.58
ST3GAL5	8869	ST3 beta-galactoside alpha-2,3-sialyltransferase 5	2 out of 3	53.0545					15.1188	0.0003	fold change	1.79	37.9357	0.0022	fold change	-2.65
PTPRB	5787	protein tyrosine phosphatase, receptor type, B	2 out of 3	53.0509					23.8761	0.0136	fold change	-2.46	29.1748	0.0028	fold change	2.17
AA173465	NA		2 out of 3	53.0301					20.6164	0.0417	fold change	-2.22	32.4137	0.0039	fold change	2.33
GID4	79018	GID complex subunit 4, VID24 homolog (S. cerevisiae)	2 out of 3	53.0287					12.0448	0.0177	fold change	1.56	40.9839	0.0097	fold change	-2.84
AKAP1	8165	A kinase (PRKA) anchor protein 1	2 out of 3	53.0265					16.3801	0.0173	fold change	1.89	36.6464	0.0028	fold change	2.58
MAN1A2	10905	mannosidase, alpha, class 1A, member 2	2 out of 3	52.9537					34.1707	0.0141	fold change	-3.41	18.7829	0.0296	fold change	-1.7
CCDC64	92558	coiled-coil domain containing 64	2 out of 3	52.9402					14.3009	0.0184	fold change	1.73	38.6393	0.0003	fold change	2.7
SEC22C	9117	SEC22 vesicle trafficking protein homolog C (S. cerevisiae)	2 out of 3	52.8855					12.8493	0.0216	fold change	1.62	40.0362	0.0001	fold change	-2.79
THRB	7068	thyroid hormone receptor, beta	2 out of 3	52.8297					10.0038	0.0055	fold change	1.4	42.8258	0.0018	fold change	2.96
236561_at	NA		2 out of 3	52.8131					27.5221	0.0432	fold change	-2.76	25.291	0.0021	fold change	-1.99
AW301241	NA		2 out of 3	52.8101					38.1002	0.0267	fold change	3.86	14.7099	0.0178	fold change	1.51
LEPREL1	55214	leprecan-like 1	2 out of 3	52.7835					38.4459	0.0125	fold change	-3.9	14.3376	0.0202	fold change	-1.49
SNX18	112574	sorting nexin 18	2 out of 3	52.7767					36.4076	0.0029	fold change	-3.64	16.3691	0.007	fold change	-1.59
UHRF1BP1L	23074	UHRF1 binding protein 1-like	2 out of 3	52.7337					37.6223	0.0009	fold change	3.8	15.1114	0.0368	fold change	-1.53
YME1L1	10730	YME1-like 1 (S. cerevisiae)	2 out of 3	52.6943					10.486	0.0096	fold change	1.44	42.2083	0.0003	fold change	-2.92
C1orf43	25912	chromosome 1 open reading frame 43	2 out of 3	52.6921					13.3648	0.0143	fold change	-1.66	35.7406	0.0098	fold change	-2.53
BTBD3	22903	BTB (POZ) domain containing 3	2 out of 3	52.6416					37.5302	0.0011	fold change	-3.79	15.1114	0.0262	fold change	1.53
ALPPL2	251	alkaline phosphatase, placental-like 2	2 out of 3	52.6071					29.3981	0.0026	fold change	2.93	23.209	0.0032	fold change	1.9
KIF16B	55614	kinesin family member 16B	2 out of 3	52.5896					34.6719	0.0214	fold change	3.46	17.9177	0.0086	fold change	1.66
USB1	79650	U6 snRNA biogenesis 1	2 out of 3	52.5843					19.4363	0.0086	fold change	-2.13	33.1479	0.014	fold change	-2.37
EPHA4	2043	EPH receptor A4	2 out of 3	52.5734					41.2592	0.002	fold change	-4.3	11.3141	0.0106	fold change	1.32
SEC24D	9871	SEC24 family, member D (S. cerevisiae)	2 out of 3	52.5471					21.047	0.0097	fold change	-2.25	31.5	0.0089	fold change	-2.28
AF003738	NA		2 out of 3	52.4998					33.4638	0.0204	fold change	-3.34	19.0359	0.0434	fold change	-1.71
GADD45A	1647	growth arrest and DNA-damage-inducible, alpha	2 out of 3	52.496					28.3669	0.0012	fold change	-2.83	24.1292	0.0011	fold change	-1.94
CHURC1	91612	churchill domain containing 1	2 out of 3	52.4449					29.6534	0.0104	fold change	-2.95	22.7915	0.0074	fold change	1.88
TBC1D2B	23102	TBC1 domain family, member 2B	2 out of 3	52.4183					29.2094	0.0262	fold change	-2.91	23.209	0.0024	fold change	1.9
S1PR5	53637	sphingosine-1-phosphate receptor 5	2 out of 3	52.3752					41.3285	3.4e-06	fold change	-4.31	11.0467	0.013	fold change	-1.3
COMMD2	51122	COMM domain containing 2	2 out of 3	52.3676					26.6856	0.0044	fold change	-2.68	25.682	0.0049	fold change	2.01
TRIM15	89870	tripartite motif containing 15	2 out of 3	52.3669					26.03	0.0002	fold change	2.63	26.3369	0.0044	fold change	2.04
PPARG	5468	peroxisome proliferator-activated receptor gamma	2 out of 3	52.269					12.8493	0.0086	fold change	1.62	39.4197	0.0028	fold change	2.75
VAPB	9217	VAMP (vesicle-associated membrane protein)-associated protein B and C	2 out of 3	52.2662					35.8971	0.0007	fold change	-3.59	16.3691	0.0182	fold change	1.59
PRSS23	11098	protease, serine, 23	2 out of 3	52.2557					20.7557	0.0019	fold change	2.23	31.5	0.0092	fold change	-2.28
LOC100506161	100506161	uncharacterized LOC100506161	2 out of 3	52.2373					28.6044	0.009	fold change	2.85	23.6328	0.0181	fold change	1.92
ZAK	51776	sterile alpha motif and leucine zipper containing kinase AZK	2 out of 3	52.2029					16.6688	0.0297	fold change	1.91	35.5341	0.0216	fold change	-2.52
EIF2S3	1968	eukaryotic translation initiation factor 2, subunit 3 gamma, 52kDa	2 out of 3	52.2011					38.4459	0.0034	fold change	-3.9	13.7552	0.0152	fold change	-1.46
IVNS1ABP	10625	influenza virus NS1A binding protein	2 out of 3	52.1433					28.9343	0.0359	fold change	2.88	23.209	0.0012	fold change	1.9
CA11	770	carbonic anhydrase XI	2 out of 3	52.1336					30.3865	0.0265	fold change	3.03	21.7472	0.013	fold change	1.83
PAQR8	85315	progestin and adipoQ receptor family member VIII	2 out of 3	52.1158					25.7789	0.0038	fold change	2.61	26.3369	0.0156	fold change	2.04
SCRN1	9805	secernin 1	2 out of 3	52.0886					25.1101	0.0337	fold change	2.56	26.9785	0.0185	fold change	-2.07
ANKMY2	57037	ankyrin repeat and MYND domain containing 2	2 out of 3	52.0485					26.5529	0.0053	fold change	2.67	25.4955	0.0049	fold change	2
BG036618	NA		2 out of 3	52.0311					37.9239	0.0006	fold change	-3.84	14.1072	0.0007	fold change	1.48
NUDT16P1	152195	nudix (nucleoside diphosphate linked moiety X)-type motif 16 pseudogene 1	2 out of 3	52.0032					15.3568	0.0115	fold change	-1.81	36.6464	0.0009	fold change	2.58
C11orf63	79864	chromosome 11 open reading frame 63	2 out of 3	51.944					18.1211	0.0145	fold change	-2.02	33.8229	0.0288	fold change	-2.41
202970_at	NA		2 out of 3	51.9399					33.1569	0.0022	fold change	3.31	18.7829	0.0013	fold change	1.7
SCPEP1	59342	serine carboxypeptidase 1	2 out of 3	51.9085					18.4447	0.002	fold change	-2.05	33.4638	0.0169	fold change	-2.39
ARHGAP23	57636	Rho GTPase activating protein 23	2 out of 3	51.8974					25.7789	0.005	fold change	-2.61	26.1185	0.0049	fold change	2.03
SERPINI1	5274	serpin peptidase inhibitor, clade I (neuroserpin), member 1	2 out of 3	51.8569					12.4372	0.0159	fold change	-1.59	39.4197	0.036	fold change	-2.75
DSG2	1829	desmoglein 2	2 out of 3	51.8513					13.9156	0.0001	fold change	1.7	37.9357	0.0014	fold change	2.65
AI791820	NA		2 out of 3	51.8302					11.794	0.0072	fold change	-1.54	40.0362	0.0017	fold change	-2.79
SNX9	51429	sorting nexin 9	2 out of 3	51.8268					40.78	0.0023	fold change	4.2	11.0467	0.01	fold change	-1.3
LFNG	3955	LFNG O-fucosylpeptide 3-beta-N-acetylglucosaminyltransferase	2 out of 3	51.8135					11.2623	0.0417	fold change	1.5	40.5512	0.0016	fold change	2.82
CDC73	79577	cell division cycle 73, Paf1/RNA polymerase II complex component, homolog (S. cerevisiae)	2 out of 3	51.8035					24.1576	0.0207	fold change	2.48	27.6458	0.0004	fold change	-2.1
HIST1H2BH	8345	histone cluster 1, H2bh	2 out of 3	51.7907					21.047	0.0283	fold change	-2.25	30.7437	0.0054	fold change	2.24
POLD4	57804	polymerase (DNA-directed), delta 4, accessory subunit	2 out of 3	51.7489					27.8589	0.0009	fold change	2.79	23.8901	0.0028	fold change	1.93
BATF	10538	basic leucine zipper transcription factor, ATF-like	2 out of 3	51.7443					11.3928	0.0096	fold change	1.51	40.3515	0.0022	fold change	2.81
DNAJC3-AS1	100289274	DNAJC3 antisense RNA 1	2 out of 3	51.6791					37.9239	0.0069	fold change	-3.84	13.7552	0.0205	fold change	-1.46
CPLX1	10815	complexin 1	2 out of 3	51.6744					29.2651	0.0043	fold change	2.92	22.4093	0.0209	fold change	1.86
ISM1	140862	isthmin 1 homolog (zebrafish)	2 out of 3	51.6694					10.8757	0.0048	fold change	1.47	40.7937	0.0127	fold change	-2.83
TMF1	7110	TATA element modulatory factor 1	2 out of 3	51.6367					10.1408	0.0397	fold change	-1.41	41.4958	0.0059	fold change	-2.87
AU147194	NA		2 out of 3	51.6153					30.3865	0.0389	fold change	-3.03	21.2288	0.0234	fold change	-1.81
MAP4K4	9448	mitogen-activated protein kinase kinase kinase kinase 4	2 out of 3	51.5677					13.491	0.0274	fold change	1.67	38.0767	0.02	fold change	-2.66
WFS1	7466	Wolfram syndrome 1 (wolframin)	2 out of 3	51.4932					21.7394	0.0113	fold change	2.3	29.7538	0.005	fold change	-2.2
Hs.666341	NA		2 out of 3	51.4286					30.1998	0.0335	fold change	-3.01	21.2288	0.0143	fold change	-1.81
SHROOM1	134549	shroom family member 1	2 out of 3	51.3874					34.7996	0.0007	fold change	3.47	16.5878	0.0077	fold change	1.6
FBLIM1	54751	filamin binding LIM protein 1	2 out of 3	51.3177					26.6856	0.0323	fold change	2.68	24.6321	0.0047	fold change	1.96
AHNAK	79026	AHNAK nucleoprotein	2 out of 3	51.2813					36.9437	0.0165	fold change	-3.71	14.3376	0.0147	fold change	1.49
CEBPD	1052	CCAAT/enhancer binding protein (C/EBP), delta	2 out of 3	51.2592					12.3138	0.0064	fold change	-1.58	38.9454	0.0026	fold change	-2.72
TMEM8A	58986	transmembrane protein 8A	2 out of 3	51.2407					27.3507	0.0002	fold change	2.74	23.8901	0.0372	fold change	1.93
LOC254057	254057	uncharacterized LOC254057	2 out of 3	51.2236					21.4698	0.0034	fold change	-2.28	29.7538	0.0101	fold change	2.2
OSBPL7	114881	oxysterol binding protein-like 7	2 out of 3	51.2109					16.801	0.0016	fold change	-1.92	34.4099	0.0071	fold change	2.45
213931_at	NA		2 out of 3	51.1974					11.0042	0.0454	fold change	1.48	40.1932	0.0232	fold change	2.8
CCDC6	8030	coiled-coil domain containing 6	2 out of 3	51.1832					30.937	0.0353	fold change	3.09	20.2463	0.0071	fold change	1.77
TGFBR1	7046	transforming growth factor, beta receptor 1	2 out of 3	51.1824					28.6044	0.009	fold change	-2.85	22.578	0.019	fold change	-1.87
ARSB	411	arylsulfatase B	2 out of 3	51.1615					13.9156	0.0032	fold change	1.7	37.2459	0.0467	fold change	-2.61
243904_at	NA		2 out of 3	51.157					29.6534	0.0038	fold change	-2.95	21.5036	0.0005	fold change	-1.82
KBTBD11	9920	kelch repeat and BTB (POZ) domain containing 11	2 out of 3	51.1257					37.7376	9.9e-05	fold change	3.82	13.3881	0.0283	fold change	1.44
GPR64	10149	G protein-coupled receptor 64	2 out of 3	51.059					10.2653	0.0002	fold change	-1.42	40.7937	0.0006	fold change	2.83
DNAJC15	29103	DnaJ (Hsp40) homolog, subfamily C, member 15	2 out of 3	51.056					12.8493	0.0448	fold change	1.62	38.2067	0.005	fold change	2.67
STK40	83931	serine/threonine kinase 40	2 out of 3	51.047					32.4994	0.0063	fold change	-3.24	18.5476	0.0201	fold change	-1.69
BF679700	NA		2 out of 3	51.0316					38.5907	0.0176	fold change	-3.91	12.441	0.0086	fold change	-1.39
PHYH	5264	phytanoyl-CoA 2-hydroxylase	2 out of 3	50.9515					33.2734	0.0008	fold change	3.32	17.6781	0.0017	fold change	1.65
WWC1	23286	WW and C2 domain containing 1	2 out of 3	50.9448					28.3669	0.0031	fold change	2.83	22.578	0.002	fold change	1.87
LATS1	9113	LATS, large tumor suppressor, homolog 1 (Drosophila)	2 out of 3	50.9339					23.2881	0.0003	fold change	-2.42	27.6458	0.0044	fold change	-2.1
TAB3	257397	TGF-beta activated kinase 1/MAP3K7 binding protein 3	2 out of 3	50.933					19.5538	0.0017	fold change	-2.14	31.3792	0.0146	fold change	-2.27
GPR176	11245	G protein-coupled receptor 176	2 out of 3	50.9054					31.703	0.0132	fold change	-3.16	19.2025	0.0049	fold change	-1.72
NREP	9315	neuronal regeneration related protein homolog (rat)	2 out of 3	50.9012					33.4638	0.0067	fold change	3.34	17.4373	0.0168	fold change	-1.64
BU789637	NA		2 out of 3	50.8572					35.3804	0.0202	fold change	-3.53	15.4767	0.003	fold change	-1.55
DICER1	23405	dicer 1, ribonuclease type III	2 out of 3	50.79					27.9985	0.0008	fold change	-2.8	22.7915	0.0189	fold change	1.88
PPP1R12B	4660	protein phosphatase 1, regulatory subunit 12B	2 out of 3	50.7255					23.747	0.017	fold change	-2.45	26.9785	0.0067	fold change	2.07
AU146646	NA		2 out of 3	50.6891					22.6906	0.0403	fold change	-2.37	27.9985	0.0054	fold change	2.12
FIS1	51024	fission 1 (mitochondrial outer membrane) homolog (S. cerevisiae)	2 out of 3	50.642					17.8916	0.0103	fold change	2	32.7504	0.0016	fold change	2.35
N36762	NA		2 out of 3	50.6007					21.047	0.0152	fold change	2.25	29.5536	0.0043	fold change	2.19
TMEM168	64418	transmembrane protein 168	2 out of 3	50.5987					17.6198	0.0227	fold change	-1.98	32.9789	0.0294	fold change	2.36
LONP2	83752	lon peptidase 2, peroxisomal	2 out of 3	50.5751					38.7732	0.0356	fold change	-3.93	11.8019	0.0427	fold change	1.35
ZDHHC20	253832	zinc finger, DHHC-type containing 20	2 out of 3	50.5568					11.9175	0.0245	fold change	-1.55	38.6393	0.0026	fold change	2.7
CALM1	801	calmodulin 1 (phosphorylase kinase, delta)	2 out of 3	50.5223					16.3801	0.0039	fold change	-1.89	34.1423	0.0031	fold change	2.43
MIPEP	4285	mitochondrial intermediate peptidase	2 out of 3	50.5103					20.2063	0.0099	fold change	2.19	30.3039	0.0121	fold change	2.22
SRGAP2B	647135	SLIT-ROBO Rho GTPase activating protein 2B (pseudogene)	2 out of 3	50.4775					32.5597	0.0357	fold change	-3.25	17.9177	0.0046	fold change	-1.66
SLC25A13	10165	solute carrier family 25 (aspartate/glutamate carrier), member 13	2 out of 3	50.4358					34.0667	0.0056	fold change	3.4	16.3691	0.0171	fold change	1.59
EPHA1	2041	EPH receptor A1	2 out of 3	50.4219					29.5109	0.0005	fold change	-2.94	20.9111	0.0223	fold change	1.8
PGAP1	80055	post-GPI attachment to proteins 1	2 out of 3	50.362					16.3801	0.02	fold change	1.89	33.9819	0.0296	fold change	2.42
C6orf132	647024	chromosome 6 open reading frame 132	2 out of 3	50.2975					19.5538	0.0054	fold change	-2.14	30.7437	0.0019	fold change	2.24
ATXN1	6310	ataxin 1	2 out of 3	50.2946					33.9254	0.0117	fold change	3.38	16.3691	0.0224	fold change	1.59
AI422414	NA		2 out of 3	50.2793					35.1679	0.0061	fold change	-3.51	15.1114	0.0021	fold change	1.53
SLC37A1	54020	solute carrier family 37 (glycerol-3-phosphate transporter), member 1	2 out of 3	50.2515					12.0448	0.0258	fold change	1.56	38.2067	0.0091	fold change	2.67
ENOSF1	55556	enolase superfamily member 1	2 out of 3	50.2052					26.9962	0.0006	fold change	2.71	23.209	0.0003	fold change	1.9
CHID1	66005	chitinase domain containing 1	2 out of 3	50.1858					26.5529	0.0021	fold change	2.67	23.6328	0.0083	fold change	1.92
TFF3	7033	trefoil factor 3 (intestinal)	2 out of 3	50.1809					40.2985	0.0102	fold change	4.13	9.8824	0.0118	fold change	1.2
BCAN	63827	brevican	2 out of 3	50.1766					15.1188	0.0052	fold change	1.79	35.0577	0.0041	fold change	2.49
C1R	715	complement component 1, r subcomponent	2 out of 3	50.1511					34.0289	0.0005	fold change	-3.39	16.1222	0.0065	fold change	-1.58
LOC100506392	100506392	uncharacterized LOC100506392	2 out of 3	50.1201					14.586	0.0096	fold change	-1.75	35.5341	0.0005	fold change	-2.52
HERC6	55008	HECT and RLD domain containing E3 ubiquitin protein ligase family member 6	2 out of 3	50.0838					23.747	0.0324	fold change	-2.45	26.3369	0.0123	fold change	-2.04
HTATSF1P2	401233	HIV-1 Tat specific factor 1 pseudogene 2	2 out of 3	50.056					33.2734	0.0193	fold change	-3.32	16.7826	0.0185	fold change	-1.61
SCCPDH	51097	saccharopine dehydrogenase (putative)	2 out of 3	49.9985					15.5886	0.0224	fold change	1.83	34.4099	0.0003	fold change	2.45
SLC7A2	6542	solute carrier family 7 (cationic amino acid transporter, y+ system), member 2	2 out of 3	49.9985					15.5886	0.0115	fold change	-1.83	34.4099	0.0005	fold change	2.45
FDFT1	2222	farnesyl-diphosphate farnesyltransferase 1	2 out of 3	49.9729					30.937	0.0271	fold change	-3.09	19.0359	0.0041	fold change	-1.71
FAM173A	65990	family with sequence similarity 173, member A	2 out of 3	49.9601					20.2063	0.0061	fold change	2.19	29.7538	0.0115	fold change	2.2
BE466160	NA		2 out of 3	49.9515					23.6146	0.0394	fold change	-2.44	26.3369	0.0223	fold change	-2.04
FBXW2	26190	F-box and WD repeat domain containing 2	2 out of 3	49.9505					38.7732	0.0019	fold change	-3.93	11.1773	0.0206	fold change	1.31
CYLD	1540	cylindromatosis (turban tumor syndrome)	2 out of 3	49.9315					17.747	0.0209	fold change	-1.99	32.1846	0.0066	fold change	-2.32
VAMP5	10791	vesicle-associated membrane protein 5 (myobrevin)	2 out of 3	49.8937					20.3401	0.0031	fold change	2.2	29.5536	0.0033	fold change	-2.19
BCKDHB	594	branched chain keto acid dehydrogenase E1, beta polypeptide	2 out of 3	49.8935					24.6025	0.0004	fold change	2.52	25.291	0.0057	fold change	1.99
Hs.621480	NA		2 out of 3	49.8858					32.6635	0.0317	fold change	-3.26	17.2223	0.0114	fold change	1.63
HSPA4L	22824	heat shock 70kDa protein 4-like	2 out of 3	49.8613					33.2734	0.001	fold change	-3.32	16.5878	0.0179	fold change	-1.6
SREBF1	6720	sterol regulatory element binding transcription factor 1	2 out of 3	49.8513					24.7412	0.0165	fold change	-2.53	25.1101	0.018	fold change	-1.98
C5	727	complement component 5	2 out of 3	49.8118					10.6183	0.0272	fold change	1.45	39.1936	0.0026	fold change	2.74
GOLGA8A	23015	golgin A8 family, member A	2 out of 3	49.8107					21.1996	0.0448	fold change	-2.26	28.6112	0.0094	fold change	-2.15
VLDLR	7436	very low density lipoprotein receptor	2 out of 3	49.8073					23.8761	0.011	fold change	-2.46	25.9312	0.0239	fold change	-2.02
RAC2	5880	ras-related C3 botulinum toxin substrate 2 (rho family, small GTP binding protein Rac2)	2 out of 3	49.7974					37.5302	0.0116	fold change	-3.79	12.2671	0.0241	fold change	-1.38
ZC3HAV1L	92092	zinc finger CCCH-type, antiviral 1-like	2 out of 3	49.7931					9.75688	0.0272	fold change	1.38	40.0362	0.0034	fold change	-2.79
BE674269	NA		2 out of 3	49.7848					36.7888	0.0074	fold change	-3.7	12.996	0.0004	fold change	1.42
BQ184262	NA		2 out of 3	49.7226					24.8814	0.0061	fold change	-2.54	24.8411	0.0019	fold change	1.97
ZXDC	79364	ZXD family zinc finger C	2 out of 3	49.6963					28.7853	0.015	fold change	-2.87	20.9111	0.0059	fold change	1.8
ALDH18A1	5832	aldehyde dehydrogenase 18 family, member A1	2 out of 3	49.6707					25.0386	0.0238	fold change	2.55	24.6321	0.0059	fold change	1.96
FAM103A1	83640	family with sequence similarity 103, member A1	2 out of 3	49.6578					22.012	0.0012	fold change	-2.32	27.6458	0.0089	fold change	2.1
SASH1	23328	SAM and SH3 domain containing 1	2 out of 3	49.6578					22.012	0.0112	fold change	-2.32	27.6458	0.0071	fold change	-2.1
ZBTB42	100128927	zinc finger and BTB domain containing 42	2 out of 3	49.6562					13.9156	0.011	fold change	-1.7	35.7406	0.0001	fold change	2.53
KLHL7	55975	kelch-like 7 (Drosophila)	2 out of 3	49.6444					29.3981	6.4e-05	fold change	2.93	20.2463	0.0123	fold change	-1.77
AGL	178	amylo-alpha-1, 6-glucosidase, 4-alpha-glucanotransferase	2 out of 3	49.582					19.8282	8.6e-05	fold change	-2.16	29.7538	0.0237	fold change	2.2
CTSB	1508	cathepsin B	2 out of 3	49.5434					34.0667	0.0252	fold change	3.4	15.4767	0.0035	fold change	-1.55
1564630_at	NA		2 out of 3	49.501					39.5085	0.0088	fold change	4.03	9.99245	0.0213	fold change	1.21
ZNF818P	390963	zinc finger protein 818, pseudogene	2 out of 3	49.4621					36.2892	0.0011	fold change	-3.63	13.1729	0.0253	fold change	1.43
BAIAP2L2	80115	BAI1-associated protein 2-like 2	2 out of 3	49.4539					34.3425	0.0131	fold change	3.43	15.1114	0.0365	fold change	1.53
PADI2	11240	peptidyl arginine deiminase, type II	2 out of 3	49.44					21.047	0.0218	fold change	2.25	28.393	0.0104	fold change	2.14
MYO6	4646	myosin VI	2 out of 3	49.4133					11.9175	0.0122	fold change	1.55	37.4959	0.0028	fold change	2.62
SMPDL3B	27293	sphingomyelin phosphodiesterase, acid-like 3B	2 out of 3	49.3733					24.7412	0.0074	fold change	2.53	24.6321	0.0028	fold change	1.96
FUT1	2523	fucosyltransferase 1 (galactoside 2-alpha-L-fucosyltransferase, H blood group)	2 out of 3	49.3683					30.8206	0.0006	fold change	-3.08	18.5476	0.0052	fold change	1.69
MTHFD1L	25902	methylenetetrahydrofolate dehydrogenase (NADP+ dependent) 1-like	2 out of 3	49.359					16.3801	0.0046	fold change	-1.89	32.9789	0.0003	fold change	-2.36
PSME4	23198	proteasome (prosome, macropain) activator subunit 4	2 out of 3	49.3474					30.3115	0.0103	fold change	-3.02	19.0359	0.0016	fold change	-1.71
KCNJ2	3759	potassium inwardly-rectifying channel, subfamily J, member 2	2 out of 3	49.2808					14.0524	0.0055	fold change	-1.71	35.2284	0.0047	fold change	-2.5
GCOM1	145781	GRINL1A complex locus 1	2 out of 3	49.2699					18.1211	0.0141	fold change	2.02	31.1488	0.005	fold change	2.26
PSD4	23550	pleckstrin and Sec7 domain containing 4	2 out of 3	49.254					20.3401	0.014	fold change	2.2	28.9139	0.0102	fold change	2.16
CEBPB	1051	CCAAT/enhancer binding protein (C/EBP), beta	2 out of 3	49.221					12.5746	0.0105	fold change	-1.6	36.6464	0.002	fold change	-2.58
MTF2	22823	metal response element binding transcription factor 2	2 out of 3	49.2111					38.7732	0.0084	fold change	-3.93	10.4379	0.0178	fold change	-1.25
PTK7	5754	PTK7 protein tyrosine kinase 7	2 out of 3	49.198					11.2623	0.0125	fold change	-1.5	37.9357	0.0068	fold change	-2.65
EMB	133418	embigin	2 out of 3	49.1864					18.7171	0.0176	fold change	-2.07	30.4692	7.8e-05	fold change	2.23
PTPRM	5797	protein tyrosine phosphatase, receptor type, M	2 out of 3	49.1665					28.7114	0.0045	fold change	-2.86	20.4552	0.0195	fold change	-1.78
PTPRH	5794	protein tyrosine phosphatase, receptor type, H	2 out of 3	49.1457					32.7766	0.0106	fold change	3.27	16.3691	0.0389	fold change	1.59
GNL3L	54552	guanine nucleotide binding protein-like 3 (nucleolar)-like	2 out of 3	49.1448					29.9423	0.0059	fold change	-2.98	19.2025	0.0151	fold change	-1.72
CHMP2A	27243	charged multivesicular body protein 2A	2 out of 3	49.1304					16.3801	0.0015	fold change	-1.89	32.7504	0.0006	fold change	2.35
ZBTB11	27107	zinc finger and BTB domain containing 11	2 out of 3	49.0494					22.2591	0.0126	fold change	-2.34	26.7903	0.0066	fold change	2.06
ZFP90	146198	zinc finger protein 90 homolog (mouse)	2 out of 3	49.0366					39.0442	0.0006	fold change	-3.98	9.99245	0.0279	fold change	-1.21
RUNX1	861	runt-related transcription factor 1	2 out of 3	49.0286					38.5907	0.0005	fold change	-3.91	10.4379	0.0291	fold change	-1.25
AI681888	NA		2 out of 3	48.9523					15.4884	0.022	fold change	-1.82	33.4638	0.0023	fold change	-2.39
GFM1	85476	G elongation factor, mitochondrial 1	2 out of 3	48.9267					26.1352	0.0188	fold change	-2.64	22.7915	0.0225	fold change	1.88
TATDN3	128387	TatD DNase domain containing 3	2 out of 3	48.9249					33.8135	0.0022	fold change	3.37	15.1114	0.0454	fold change	1.53
GCAT	23464	glycine C-acetyltransferase	2 out of 3	48.8931					35.8971	0.0016	fold change	3.59	12.996	0.0093	fold change	-1.42
AI921844	NA		2 out of 3	48.8807					34.1707	8e-05	fold change	3.41	14.7099	0.0272	fold change	-1.51
TPST1	8460	tyrosylprotein sulfotransferase 1	2 out of 3	48.8528					26.2749	0.0181	fold change	-2.65	22.578	0.029	fold change	-1.87
SH3TC2	79628	SH3 domain and tetratricopeptide repeats 2	2 out of 3	48.8445					27.0973	0.0172	fold change	2.72	21.7472	0.0033	fold change	1.83
WWC2	80014	WW and C2 domain containing 2	2 out of 3	48.8363					13.0957	0.0371	fold change	1.64	35.7406	0.0016	fold change	-2.53
ITGA3	3675	integrin, alpha 3 (antigen CD49C, alpha 3 subunit of VLA-3 receptor)	2 out of 3	48.8233					14.8414	0.0009	fold change	-1.77	33.9819	0.0044	fold change	-2.42
SLC45A3	85414	solute carrier family 45, member 3	2 out of 3	48.7474					15.1188	0.0109	fold change	1.79	33.6286	0.0125	fold change	2.4
CLDN23	137075	claudin 23	2 out of 3	48.7418					11.0042	0.0478	fold change	1.48	37.7376	0.0019	fold change	2.64
SAMD13	148418	sterile alpha motif domain containing 13	2 out of 3	48.7283					14.586	0.0366	fold change	1.75	34.1423	0.011	fold change	2.43
KCTD20	222658	potassium channel tetramerisation domain containing 20	2 out of 3	48.6488					26.9017	0.001	fold change	-2.7	21.7472	0.0107	fold change	-1.83
TMX4	56255	thioredoxin-related transmembrane protein 4	2 out of 3	48.6434					24.5143	0.0005	fold change	-2.51	24.1292	0.0041	fold change	-1.94
Hs.650712	NA		2 out of 3	48.615					30.937	0.0318	fold change	-3.09	17.6781	0.0138	fold change	1.65
ALKBH7	84266	alkB, alkylation repair homolog 7 (E. coli)	2 out of 3	48.5816					35.0177	0.0098	fold change	3.49	13.564	0.0119	fold change	-1.45
HIST1H1C	3006	histone cluster 1, H1c	2 out of 3	48.5795					27.3507	0.025	fold change	-2.74	21.2288	0.0071	fold change	1.81
KPNA1	3836	karyopherin alpha 1 (importin alpha 5)	2 out of 3	48.5791					23.2881	0.0237	fold change	-2.42	25.291	0.0066	fold change	1.99
STRBP	55342	spermatid perinuclear RNA binding protein	2 out of 3	48.5632					38.338	0.0206	fold change	-3.89	10.2252	0.012	fold change	1.23
PPP6C	5537	protein phosphatase 6, catalytic subunit	2 out of 3	48.5521					23.0566	0.0005	fold change	-2.4	25.4955	0.0039	fold change	-2
AI199398	NA		2 out of 3	48.5319					36.4076	0.0027	fold change	-3.64	12.1244	0.0238	fold change	1.37
CIB1	10519	calcium and integrin binding 1 (calmyrin)	2 out of 3	48.5177					12.3138	0.0004	fold change	1.58	36.2038	0.0006	fold change	2.56
CPSF3	51692	cleavage and polyadenylation specific factor 3, 73kDa	2 out of 3	48.4855					31.703	0.0004	fold change	3.16	16.7826	0.0273	fold change	1.61
S100A10	6281	S100 calcium binding protein A10	2 out of 3	48.4788					10.1408	0.0052	fold change	1.41	38.338	0.0029	fold change	2.68
MRPL23	6150	mitochondrial ribosomal protein L23	2 out of 3	48.4363					29.6534	0.0025	fold change	2.95	18.7829	0.0061	fold change	1.7
DENND3	22898	DENN/MADD domain containing 3	2 out of 3	48.4323					30.5146	0.0026	fold change	3.05	17.9177	0.0132	fold change	-1.66
HNRNPU	3192	heterogeneous nuclear ribonucleoprotein U (scaffold attachment factor A)	2 out of 3	48.3982					23.2881	0.0044	fold change	2.42	25.1101	0.0065	fold change	1.98
AP1S1	1174	adaptor-related protein complex 1, sigma 1 subunit	2 out of 3	48.3783					17.2296	0.0424	fold change	1.95	31.1488	0.006	fold change	2.26
MYO1E	4643	myosin IE	2 out of 3	48.3723					11.5393	0.0008	fold change	1.52	36.833	5.2e-05	fold change	2.59
C1orf172	126695	chromosome 1 open reading frame 172	2 out of 3	48.3568					14.0524	0.0022	fold change	-1.71	34.3044	0.0235	fold change	2.44
DLG3	1741	discs, large homolog 3 (Drosophila)	2 out of 3	48.3109					18.007	0.0062	fold change	2.01	30.3039	0.0011	fold change	2.22
AGTPBP1	23287	ATP/GTP binding protein 1	2 out of 3	48.3109					18.007	0.0142	fold change	2.01	30.3039	0.0063	fold change	-2.22
NPDC1	56654	neural proliferation, differentiation and control, 1	2 out of 3	48.3099					12.97	0.005	fold change	1.63	35.3399	0.0455	fold change	2.51
L2HGDH	79944	L-2-hydroxyglutarate dehydrogenase	2 out of 3	48.3063					34.9182	0.0008	fold change	-3.48	13.3881	0.0387	fold change	1.44
MAPK12	6300	mitogen-activated protein kinase 12	2 out of 3	48.2423					10.7464	0.0007	fold change	1.46	37.4959	0.007	fold change	-2.62
ABLIM1	3983	actin binding LIM protein 1	2 out of 3	48.1903					22.2591	0.0099	fold change	-2.34	25.9312	0.0032	fold change	2.02
EGFR	1956	epidermal growth factor receptor	2 out of 3	48.1892					26.6856	0.0009	fold change	2.68	21.5036	0.0024	fold change	-1.82
C6orf225	619208	chromosome 6 open reading frame 225	2 out of 3	48.0953					11.2623	0.0055	fold change	1.5	36.833	0.0016	fold change	-2.59
TMEM2	23670	transmembrane protein 2	2 out of 3	48.0939					21.5753	0.0143	fold change	2.29	26.5186	0.0031	fold change	2.05
SFXN3	81855	sideroflexin 3	2 out of 3	48.0911					36.2892	0.0032	fold change	3.63	11.8019	0.0125	fold change	-1.35
MCCC1	56922	methylcrotonoyl-CoA carboxylase 1 (alpha)	2 out of 3	48.0837					35.0877	0.0002	fold change	-3.5	12.996	0.0079	fold change	1.42
ACSL3	2181	acyl-CoA synthetase long-chain family member 3	2 out of 3	48.0721					31.703	0.0417	fold change	-3.16	16.3691	0.0086	fold change	-1.59
HMGA1	3159	high mobility group AT-hook 1	2 out of 3	48.0473					17.1025	0.0032	fold change	1.94	30.9448	0.0465	fold change	-2.25
PHC1	1911	polyhomeotic homolog 1 (Drosophila)	2 out of 3	48.036					30.1183	0.0439	fold change	-3	17.9177	3.6e-06	fold change	-1.66
MLF1IP	79682	MLF1 interacting protein	2 out of 3	48.0198					22.5242	0.0104	fold change	-2.36	25.4955	0.0015	fold change	-2
SMAD2	4087	SMAD family member 2	2 out of 3	48.0107					27.9985	0.0008	fold change	-2.8	20.0122	0.0007	fold change	-1.76
PTPN18	26469	protein tyrosine phosphatase, non-receptor type 18 (brain-derived)	2 out of 3	47.953					24.3201	0.0089	fold change	2.49	23.6328	0.0025	fold change	1.92
CCDC53	51019	coiled-coil domain containing 53	2 out of 3	47.9197					26.416	0.0056	fold change	2.66	21.5036	0.0017	fold change	-1.82
DHFRL1	200895	dihydrofolate reductase-like 1	2 out of 3	47.9162					19.305	0.0174	fold change	-2.12	28.6112	0.0235	fold change	2.15
DNAH1	25981	dynein, axonemal, heavy chain 1	2 out of 3	47.8964					16.9516	0.0241	fold change	1.93	30.9448	0.0072	fold change	2.25
GOLIM4	27333	golgi integral membrane protein 4	2 out of 3	47.8762					23.747	0.0422	fold change	2.45	24.1292	0.0185	fold change	1.94
C8orf37	157657	chromosome 8 open reading frame 37	2 out of 3	47.8753					14.0524	0.0094	fold change	1.71	33.8229	0.0078	fold change	-2.41
AK3	50808	adenylate kinase 3	2 out of 3	47.868					35.8971	0.0037	fold change	-3.59	11.9709	0.0324	fold change	-1.36
GIT2	9815	G protein-coupled receptor kinase interacting ArfGAP 2	2 out of 3	47.8661					19.7138	0.0209	fold change	2.15	28.1524	0.001	fold change	-2.13
CYB5B	80777	cytochrome b5 type B (outer mitochondrial membrane)	2 out of 3	47.8579					21.3393	0.0081	fold change	2.27	26.5186	0.0021	fold change	2.05
GLYCTK	132158	glycerate kinase	2 out of 3	47.8252					31.703	3.8e-05	fold change	3.16	16.1222	0.045	fold change	1.58
PHF11	51131	PHD finger protein 11	2 out of 3	47.8239					28.217	0.0125	fold change	-2.82	19.6068	0.0008	fold change	-1.74
ITPR1	3708	inositol 1,4,5-trisphosphate receptor, type 1	2 out of 3	47.8152					22.5242	0.0331	fold change	-2.36	25.291	0.0049	fold change	-1.99
LOC729852	729852	uncharacterized LOC729852	2 out of 3	47.7876					16.0927	0.0006	fold change	1.87	31.6949	0.0124	fold change	2.29
ZNF618	114991	zinc finger protein 618	2 out of 3	47.759					33.8135	0.0003	fold change	-3.37	13.9456	0.0203	fold change	-1.47
AI521765	NA		2 out of 3	47.757					29.2094	0.0409	fold change	2.91	18.5476	0.016	fold change	1.69
PHF20	51230	PHD finger protein 20	2 out of 3	47.7533					18.5785	0.0047	fold change	-2.06	29.1748	0.0173	fold change	-2.17
PARVB	29780	parvin, beta	2 out of 3	47.7277					15.8519	0.0033	fold change	1.85	31.8758	0.0141	fold change	-2.3
C1GALT1	56913	core 1 synthase, glycoprotein-N-acetylgalactosamine 3-beta-galactosyltransferase, 1	2 out of 3	47.6943					28.4918	0.0034	fold change	2.84	19.2025	0.0133	fold change	1.72
CSGALNACT1	55790	chondroitin sulfate N-acetylgalactosaminyltransferase 1	2 out of 3	47.6029					10.0038	0.0024	fold change	1.4	37.5991	0.01	fold change	-2.63
SEZ6L2	26470	seizure related 6 homolog (mouse)-like 2	2 out of 3	47.5338					30.3115	0.0112	fold change	3.02	17.2223	0.048	fold change	1.63
SLC35A1	10559	solute carrier family 35 (CMP-sialic acid transporter), member A1	2 out of 3	47.5251					32.4137	1.5e-06	fold change	3.23	15.1114	0.0198	fold change	1.53
DDB2	1643	damage-specific DNA binding protein 2, 48kDa	2 out of 3	47.509					23.8761	0.0496	fold change	-2.46	23.6328	0.0004	fold change	1.92
Hs.573994	NA		2 out of 3	47.4943					28.7114	0.0062	fold change	2.86	18.7829	0.0182	fold change	-1.7
USP3	9960	ubiquitin specific peptidase 3	2 out of 3	47.4925					18.5785	0.0102	fold change	-2.06	28.9139	0.0002	fold change	2.16
CPNE2	221184	copine II	2 out of 3	47.4638					14.7135	0.0179	fold change	1.76	32.7504	0.0012	fold change	-2.35
ZNF438	220929	zinc finger protein 438	2 out of 3	47.4388					35.6369	0.0004	fold change	3.56	11.8019	0.004	fold change	-1.35
AW665321	NA		2 out of 3	47.417					34.0289	0.0121	fold change	-3.39	13.3881	0.0214	fold change	-1.44
RHOBTB3	22836	Rho-related BTB domain containing 3	2 out of 3	47.4094					33.4638	0.0037	fold change	-3.34	13.9456	0.0288	fold change	1.47
CEP170P1	645455	centrosomal protein 170kDa pseudogene 1	2 out of 3	47.401					21.4698	0.0004	fold change	2.28	25.9312	0.0364	fold change	-2.02
CBR3	874	carbonyl reductase 3	2 out of 3	47.4001					13.0957	0.0087	fold change	-1.64	34.3044	0.0014	fold change	-2.44
GGT1	2678	gamma-glutamyltransferase 1	2 out of 3	47.3799					12.97	0.0192	fold change	1.63	34.4099	0.0062	fold change	2.45
ZNF789	285989	zinc finger protein 789	2 out of 3	47.3591					34.9182	0.0064	fold change	-3.48	12.441	0.0221	fold change	1.39
ACADSB	36	acyl-CoA dehydrogenase, short/branched chain	2 out of 3	47.3586					18.4447	0.0411	fold change	-2.05	28.9139	0.0002	fold change	-2.16
SLC39A10	57181	solute carrier family 39 (zinc transporter), member 10	2 out of 3	47.3387					36.7888	0.0003	fold change	3.7	10.5499	0.0481	fold change	-1.26
FAM84B	157638	family with sequence similarity 84, member B	2 out of 3	47.2907					24.8814	0.0245	fold change	2.54	22.4093	0.0037	fold change	-1.86
SOX9	6662	SRY (sex determining region Y)-box 9	2 out of 3	47.2755					33.7116	0.0002	fold change	3.36	13.564	0.0305	fold change	1.45
RRAGC	64121	Ras-related GTP binding C	2 out of 3	47.2713					16.5276	0.0025	fold change	-1.9	30.7437	0.0072	fold change	-2.24
C14orf132	56967	chromosome 14 open reading frame 132	2 out of 3	47.2497					10.0038	0.0061	fold change	1.4	37.2459	0.0008	fold change	-2.61
PLOD3	8985	procollagen-lysine, 2-oxoglutarate 5-dioxygenase 3	2 out of 3	47.2364					31.3393	0.0025	fold change	3.13	15.897	0.0323	fold change	1.57
TPST2	8459	tyrosylprotein sulfotransferase 2	2 out of 3	47.2312					15.8519	0.0417	fold change	-1.85	31.3792	0.0075	fold change	-2.27
C12orf45	121053	chromosome 12 open reading frame 45	2 out of 3	47.2169					34.5841	0.0002	fold change	3.45	12.6327	0.0367	fold change	-1.4
STARD5	80765	StAR-related lipid transfer (START) domain containing 5	2 out of 3	47.1902					36.0129	0.0047	fold change	-3.6	11.1773	0.0006	fold change	1.31
1556006_s_at	NA		2 out of 3	47.189					29.5109	0.0044	fold change	-2.94	17.6781	0.0285	fold change	1.65
SVIP	258010	small VCP/p97-interacting protein	2 out of 3	47.1859					26.2749	0.017	fold change	-2.65	20.9111	0.0066	fold change	1.8
BCL9L	283149	B-cell CLL/lymphoma 9-like	2 out of 3	47.1775					21.8865	0.0022	fold change	2.31	25.291	0.0047	fold change	-1.99
GINS2	51659	GINS complex subunit 2 (Psf2 homolog)	2 out of 3	47.176					27.7582	0.0185	fold change	-2.78	19.4179	0.003	fold change	1.73
COL9A3	1299	collagen, type IX, alpha 3	2 out of 3	47.176					27.7582	0.0024	fold change	-2.78	19.4179	0.0381	fold change	-1.73
WTAP	9589	Wilms tumor 1 associated protein	2 out of 3	47.156					19.7138	0.0096	fold change	-2.15	27.4422	0.0084	fold change	-2.09
TPMT	7172	thiopurine S-methyltransferase	2 out of 3	47.1521					28.6044	0.0264	fold change	2.85	18.5476	0.0022	fold change	1.69
KLHL15	80311	kelch-like 15 (Drosophila)	2 out of 3	47.1187					9.87286	0.0021	fold change	-1.39	37.2459	0.0062	fold change	-2.61
211042_x_at	NA		2 out of 3	47.1142					32.7766	0.0064	fold change	-3.27	14.3376	0.0085	fold change	1.49
KIAA0368	23392	KIAA0368	2 out of 3	47.0664					17.8916	0.009	fold change	-2	29.1748	0.0054	fold change	-2.17
TGIF2	60436	TGFB-induced factor homeobox 2	2 out of 3	47.0555					28.9343	0.002	fold change	-2.88	18.1211	0.0032	fold change	-1.67
SGCE	8910	sarcoglycan, epsilon	2 out of 3	46.9753					34.3425	0.0109	fold change	-3.43	12.6327	0.0072	fold change	1.4
BE503070	NA		2 out of 3	46.9575					36.4076	0.0404	fold change	-3.64	10.5499	0.0078	fold change	-1.26
TBC1D16	125058	TBC1 domain family, member 16	2 out of 3	46.926					10.486	0.0016	fold change	1.44	36.44	0.0022	fold change	-2.57
C1orf21	81563	chromosome 1 open reading frame 21	2 out of 3	46.9235					24.5143	0.013	fold change	-2.51	22.4093	0.0039	fold change	1.86
FKBP5	2289	FK506 binding protein 5	2 out of 3	46.9215					33.9254	0.0008	fold change	3.38	12.996	0.0397	fold change	1.42
NAA50	80218	N(alpha)-acetyltransferase 50, NatE catalytic subunit	2 out of 3	46.8829					19.7138	0.0325	fold change	-2.15	27.1692	0.011	fold change	2.08
PRTG	283659	protogenin	2 out of 3	46.8793					11.5393	8.6e-05	fold change	1.52	35.3399	0.0223	fold change	-2.51
LRIG1	26018	leucine-rich repeats and immunoglobulin-like domains 1	2 out of 3	46.8789					9.63302	0.01	fold change	1.37	37.2459	0.0029	fold change	-2.61
AF339768	NA		2 out of 3	46.8757					29.6534	0.0209	fold change	-2.95	17.2223	0.0069	fold change	-1.63
TRA2A	29896	transformer 2 alpha homolog (Drosophila)	2 out of 3	46.8707					36.9883	0.023	fold change	-3.72	9.8824	0.03	fold change	-1.2
PCNXL4	64430	pecanex-like 4 (Drosophila)	2 out of 3	46.8421					14.4285	0.0172	fold change	-1.74	32.4137	0.0056	fold change	-2.33
SSR1	6745	signal sequence receptor, alpha	2 out of 3	46.8344					24.8814	1.3e-05	fold change	-2.54	12.2671	0.0014	fold change	-1.38
RAB15	376267	RAB15, member RAS oncogene family	2 out of 3	46.8329					20.4961	0.0064	fold change	2.21	26.3369	0.0038	fold change	2.04
ZNF189	7743	zinc finger protein 189	2 out of 3	46.8315					20.9003	0.001	fold change	-2.24	25.9312	0.0284	fold change	-2.02
C6orf141	135398	chromosome 6 open reading frame 141	2 out of 3	46.8164					16.801	0.0049	fold change	1.92	30.0154	0.0004	fold change	2.21
MCL1	4170	myeloid cell leukemia sequence 1 (BCL2-related)	2 out of 3	46.8138					15.1188	0.0154	fold change	-1.79	31.6949	0.0018	fold change	-2.29
C12orf23	90488	chromosome 12 open reading frame 23	2 out of 3	46.8028					14.0524	0.0001	fold change	1.71	32.7504	0.0036	fold change	-2.35
ZC3H12A	80149	zinc finger CCCH-type containing 12A	2 out of 3	46.7886					19.1427	0.0291	fold change	-2.11	27.6458	0.0008	fold change	-2.1
ZNRF2	223082	zinc and ring finger 2	2 out of 3	46.7872					10.1408	0.0207	fold change	1.41	36.6464	0.0086	fold change	2.58
EVI5	7813	ecotropic viral integration site 5	2 out of 3	46.7814					27.9985	0.0003	fold change	-2.8	18.7829	0.0214	fold change	-1.7
FUCA1	2517	fucosidase, alpha-L- 1, tissue	2 out of 3	46.7768					35.7301	2.4e-05	fold change	-3.58	11.0467	0.0138	fold change	-1.3
TMEM167A	153339	transmembrane protein 167A	2 out of 3	46.7351					22.103	0.0028	fold change	2.33	24.6321	0.0005	fold change	1.96
HIST1H2BE	8344	histone cluster 1, H2be	2 out of 3	46.729					21.047	0.0453	fold change	-2.25	25.682	0.0123	fold change	2.01
PPM1A	5494	protein phosphatase, Mg2+/Mn2+ dependent, 1A	2 out of 3	46.7252					34.458	0.0007	fold change	-3.44	12.2671	0.0044	fold change	1.38
CLDND1	56650	claudin domain containing 1	2 out of 3	46.7166					31.0385	4.4e-05	fold change	-3.1	15.6781	0.0142	fold change	-1.56
CDRT4	284040	CMT1A duplicated region transcript 4	2 out of 3	46.7156					18.7171	0.0412	fold change	-2.07	27.9985	0.0121	fold change	-2.12
MLLT3	4300	myeloid/lymphoid or mixed-lineage leukemia (trithorax homolog, Drosophila); translocated to, 3	2 out of 3	46.6879					28.3669	0.0007	fold change	-2.83	18.321	0.0179	fold change	1.68
TTC12	54970	tetratricopeptide repeat domain 12	2 out of 3	46.6807					29.0027	0.0163	fold change	2.89	17.6781	0.0082	fold change	1.65
PEX3	8504	peroxisomal biogenesis factor 3	2 out of 3	46.6181					18.007	0.0218	fold change	-2.01	28.6112	0.0043	fold change	-2.15
PPAP2C	8612	phosphatidic acid phosphatase type 2C	2 out of 3	46.6031					26.9962	0.0143	fold change	2.71	19.6068	0.0155	fold change	1.74
RNF146	81847	ring finger protein 146	2 out of 3	46.5565					12.5746	0.012	fold change	-1.6	33.9819	0.0051	fold change	-2.42
WLS	79971	wntless homolog (Drosophila)	2 out of 3	46.4935					17.1025	0.0244	fold change	-1.94	29.391	0.0014	fold change	2.18
SMTN	6525	smoothelin	2 out of 3	46.4905					21.1996	0.0128	fold change	-2.26	25.291	0.0204	fold change	-1.99
RPS16P5	647190	ribosomal protein S16 pseudogene 5	2 out of 3	46.4786					25.7789	0.0023	fold change	-2.61	20.6997	0.0114	fold change	-1.79
NELL2	4753	NEL-like 2 (chicken)	2 out of 3	46.4353					27.3994	0.0001	fold change	-2.75	19.0359	0.003	fold change	-1.71
RAB4A	5867	RAB4A, member RAS oncogene family	2 out of 3	46.4332					15.4884	0.0094	fold change	1.82	30.9448	0.0048	fold change	2.25
NDFIP2	54602	Nedd4 family interacting protein 2	2 out of 3	46.3981					11.5393	0.0194	fold change	-1.52	34.8588	0.0028	fold change	2.48
MRPS16	51021	mitochondrial ribosomal protein S16	2 out of 3	46.3415					35.5545	4.4e-05	fold change	3.55	10.7869	0.001	fold change	1.28
MANEA	79694	mannosidase, endo-alpha	2 out of 3	46.3128					9.87286	0.0272	fold change	-1.39	36.44	0.0085	fold change	-2.57
CSNK1E	1454	casein kinase 1, epsilon	2 out of 3	46.3016					15.3568	0.0233	fold change	-1.81	30.9448	0.0008	fold change	-2.25
LOC201651	201651	arylacetamide deacetylase (esterase) pseudogene	2 out of 3	46.2835					30.3865	0.0098	fold change	-3.03	15.897	0.045	fold change	1.57
244779_at	NA		2 out of 3	46.265					35.0877	0.0013	fold change	3.5	11.1773	0.0297	fold change	-1.31
AI300571	NA		2 out of 3	46.2381					36.0129	0.0061	fold change	-3.6	10.2252	0.0432	fold change	-1.23
PI4K2A	55361	phosphatidylinositol 4-kinase type 2 alpha	2 out of 3	46.2341					25.7789	0.0002	fold change	-2.61	20.4552	0.0089	fold change	-1.78
PHTF1	10745	putative homeodomain transcription factor 1	2 out of 3	46.2218					11.9175	0.0423	fold change	-1.55	34.3044	0.0065	fold change	-2.44
SLC15A2	6565	solute carrier family 15 (H+/peptide transporter), member 2	2 out of 3	46.1914					15.7222	0.0123	fold change	-1.84	30.4692	0.0016	fold change	2.23
AA046241	NA		2 out of 3	46.1647					32.7766	0.0023	fold change	-3.27	13.3881	0.0477	fold change	-1.44
ACAT1	38	acetyl-CoA acetyltransferase 1	2 out of 3	46.0822					31.1725	0.001	fold change	3.12	14.9098	0.0097	fold change	-1.52
FOSL2	2355	FOS-like antigen 2	2 out of 3	46.0724					19.5538	0.013	fold change	-2.14	26.5186	0.0289	fold change	-2.05
RCC2	55920	regulator of chromosome condensation 2	2 out of 3	46.0642					34.5841	6.3e-05	fold change	-3.45	11.4801	0.0155	fold change	1.33
222380_s_at	NA		2 out of 3	46.0599					16.6688	0.0254	fold change	-1.91	29.391	0.0106	fold change	2.18
MGST3	4259	microsomal glutathione S-transferase 3	2 out of 3	46.0484					30.937	0.0001	fold change	3.09	15.1114	0.0029	fold change	1.53
FUT2	2524	fucosyltransferase 2 (secretor status included)	2 out of 3	46.0127					17.6198	0.0069	fold change	1.98	28.393	0.0039	fold change	2.14
KLHL21	9903	kelch-like 21 (Drosophila)	2 out of 3	46.0104					20.9003	0.0238	fold change	-2.24	25.1101	0.0064	fold change	-1.98
ACADVL	37	acyl-CoA dehydrogenase, very long chain	2 out of 3	45.9916					20.4961	0.0215	fold change	2.21	25.4955	0.0043	fold change	2
SGCB	6443	sarcoglycan, beta (43kDa dystrophin-associated glycoprotein)	2 out of 3	45.9552					13.7706	0.044	fold change	1.69	32.1846	0.0179	fold change	-2.32
[truncated: 3,006 more rows]
